# Supplementary material for: Hybrid QSPR models for the prediction of the free energy of solvation of organic solute/solvent pairs
Source: Royal Society of Chemistry journal article supplement (doi:10.1039/c8cp07562j), 2019-01-01
Supplement: c8cp07562j1.xlsx [file c8cp07562j1.xlsx]

## Sheet: S1
Solute	Solvent	Solute CAS	Solvent CAS	Experimental ΔG (kcal/mol)	Status	Predicted ΔG (PLS) (kcal/mol)	Predicted ΔG (MLR) (kcal/mol)
1,1,1,3,3,3-hexafluoropropane	octanol	920-66-1	111-87-5	-5.76	Train	-5.78812	-5.22515
1,1,1-trichloroethane	1,1,1-trichloroethane	71-55-6	71-55-6	-5.65727	Train	-5.63488	-5.12128
1,1,1-trichloroethane	cyclohexane	71-55-6	110-82-7	-4.08	Train	-4.95559	-4.72856
1,1,1-trichloroethane	hexadecane	71-55-6	544-76-3	-3.73	Train	-4.42602	-4.20312
1,1,1-trichloroethane	undecane	71-55-6	1120-21-4	-3.82	Train	-4.38698	-4.4716
1,1,1-trifluoropropan-2-ol	octanol	374-01-6	111-87-5	-5.12	Test	-4.9699	-5.33741
1,1,2,2-tetrachloroethane	1,1,2,2-tetrachloroethane	79-34-5	79-34-5	-6.12333	Test	-6.53458	-6.48248
1,1,2-trichloro-1,2,2-trifluoroethane	hexadecane	76-13-1	544-76-3	-2.89	Train	-3.11187	-2.67326
1,1,2-trichloroethane	hexadecane	79-00-5	544-76-3	-4.49	Train	-4.86885	-3.90372
1,1-Difluorethane	methanol	75-37-6	67-56-1	-1.9	Train	-2.44781	-2.57649
1,1-Difluorethane	octanol	75-37-6	111-87-5	-1.13	Train	-1.54798	-2.04897
trimethylbenzene	trimethylbenzene	526-73-8	526-73-8	-6.47	Train	-6.26048	-7.51611
1,2,4-trichlorobenzene	1,2,4-trichlorobenzene	120-82-1	120-82-1	-7.57171	Train	-7.53729	-7.2378
1,2-diaminoethane	1,2-diaminoethane	107-15-3	107-15-3	-5.92257	Train	-5.58078	-5.62394
1,2-dichlorobenzene	heptane	95-50-1	142-82-5	-6.01	Train	-5.59613	-6.87228
1,2-dichlorobenzene	hexadecane	95-50-1	544-76-3	-6.16	Train	-5.37531	-6.09957
1,2-dichlorobenzene	octanol	95-50-1	111-87-5	-6.01	Train	-6.71586	-6.37207
1,2-dichlorobenzene	1,2-dichlorobenzene	95-50-1	95-50-1	-6.89	Train	-6.57183	-6.3302
1,2-dichlorobenzene	undecane	95-50-1	1120-21-4	-6.11	Train	-5.33628	-5.00837
1,2-dichloroethane	1,2-dichloroethane	107-06-2	107-06-2	-4.69647	Test	-5.23916	-4.39893
1,2-dichloroethene	hexadecane	156-59-2	544-76-3	-3.33	Test	-3.61924	-3.30836
1,2-dichloroethene	hexadecane	156-59-2	544-76-3	-3.11	Train	-3.61924	-3.30836
1,2-dichloroethene	undecane	156-59-2	1120-21-4	-3.6	Train	-3.5802	-3.21655
1,2-dimehtoxybenzene	1,2-dimehtoxybenzene	91-16-7	91-16-7	-7.48806	Train	-6.58477	-6.90211
1,2-dimethoxyethane	octanol	110-71-4	111-87-5	-4.55	Train	-3.85803	-5.98285
1,2-ethanediol	hexadecane	107-21-1	544-76-3	-2.81	Test	-3.1106	-2.014
1,4-dichlorobenzene	carbon tetrachloride	106-46-7	56-23-5	-6.28	Train	-6.01541	-6.41931
1,4-dichlorobenzene	chloroform	106-46-7	67-66-3	-6.32	Train	-6.5001	-7.28726
1,4-dichlorobenzene	cyclohexane	106-46-7	110-82-7	-5.89	Test	-5.88911	-6.26077
1,4-dichlorobenzene	diethylether	106-46-7	60-29-7	-6.18	Test	-6.45813	-6.61133
1,4-dichlorobenzene	heptane	106-46-7	142-82-5	-5.81	Train	-5.58035	-5.57453
1,4-dichlorobenzene	hexadecane	106-46-7	544-76-3	-6.02	Train	-5.35954	-6.96445
1,4-dichlorobenzene	hexane	106-46-7	110-54-3	-5.69	Train	-5.64191	-5.76611
1,4-dichlorobenzene	octanol	106-46-7	111-87-5	-5.67	Train	-6.70009	-6.95437
1,4-dioxane	dimethylacetamide	123-91-1	127-19-5	-5.01	Train	-4.20127	-4.50202
1,4-dioxane	dimethylformamide	123-91-1	68-12-2	-5.03	Train	-4.29321	-4.36879
1,4-dioxane	DMSO	123-91-1	67-68-5	-4.9	Train	-4.55497	-4.44132
1,4-dioxane	ethanol	123-91-1	64-17-5	-4.68	Test	-3.95855	-4.19001
1,4-dioxane	isopropanol	123-91-1	67-63-0	-4.49	Train	-3.75854	-4.49828
1,4-dioxane	methoxyethanol	123-91-1	109-86-4	-4.91	Train	-4.18639	-4.37066
1,4-dioxane	methylformamide	123-91-1	123-39-7	-4.86	Train	-3.96526	-4.55663
1,4-dioxane	propanol	123-91-1	71-23-8	-4.61	Train	-3.80366	-3.94433
1,8-cineole	1,8-cineole	470-82-6	470-82-6	-6.51291	Train	-6.41392	-6.66336
butanol	butanol	71-36-3	71-36-3	-6.15918	Train	-5.60927	-5.61742
butanol	1,2-Dibromoethane	71-36-3	106-93-4	-4.65	Test	-5.10571	-4.43683
butanol	1,2-Dichlorethane	71-36-3	107-06-2	-4.92	Test	-5.21524	-5.00189
butanol	benzene	71-36-3	71-43-2	-4.45	Train	-4.69241	-3.80737
butanol	bromobenzene	71-36-3	108-86-1	-4.08	Test	-4.91186	-4.08749
butanol	bromoform	71-36-3	75-25-2	-4.72	Train	-4.77963	-5.15185
butanol	butanol	71-36-3	71-36-3	-6.03	Test	-5.53424	-5.61742
butanol	butylacetate	71-36-3	123-86-4	-5.23	Train	-5.08874	-5.10947
butanol	carbon tetrachloride	71-36-3	56-23-5	-4.2	Test	-4.50566	-3.79902
butanol	chlorobenzene	71-36-3	108-90-7	-4.31	Train	-4.93244	-4.06809
butanol	chloroform	71-36-3	67-66-3	-5.28	Train	-4.99035	-6.4374
butanol	cyclohexane	71-36-3	110-82-7	-3.52	Train	-4.37936	-4.09198
butanol	decane	71-36-3	124-18-5	-3.77	Train	-4.08525	-4.20026
butanol	diethylether	71-36-3	60-29-7	-5.69	Train	-4.94838	-5.05599
butanol	dodecane	71-36-3	112-40-3	-3.47	Train	-3.88195	-3.8154
butanol	ethylacetate	71-36-3	141-78-6	-5.77	Train	-5.28047	-5.29156
butanol	ethylbenzene	71-36-3	100-41-4	-3.77	Test	-4.56492	-4.1822
butanol	heptane	71-36-3	142-82-5	-3.66	Train	-4.0706	-4.05073
butanol	hexadecane	71-36-3	544-76-3	-3.55	Test	-3.84979	-3.64665
butanol	hexane	71-36-3	110-54-3	-3.77	Train	-4.13216	-4.10777
butanol	iodobenzene	71-36-3	591-50-4	-4.05	Train	-4.82786	-4.70665
butanol	isooctane	71-36-3	540-84-1	-3.56	Train	-3.76509	-3.57448
butanol	methanol	71-36-3	67-56-1	-5.31	Test	-6.09017	-5.50497
butanol	nonane	71-36-3	111-84-2	-3.77	Train	-3.94148	-3.88145
butanol	octane	71-36-3	111-65-9	-3.69	Train	-3.9883	-3.62486
butanol	octanol	71-36-3	111-87-5	-5.71	Train	-5.19034	-5.29602
butanol	pentane	71-36-3	109-66-0	-3.77	Train	-4.21354	-4.23379
butanol	toluene	71-36-3	108-88-3	-4.31	Train	-4.60027	-4.07071
butanol	tributylphosphate	71-36-3	126-73-8	-6.28	Train	-4.98886	-4.75569
butanol	xylene (mixed isomers)	71-36-3	1330-20-7	-4.17	Train	-4.509	-4.51536
1-butene	carbon tetrachloride	106-98-9	56-23-5	-2.48	Train	-2.99839	-2.67791
1-butene	hexadecane	106-98-9	544-76-3	-2.03	Train	-2.34251	-2.48749
1-butene	isooctane	106-98-9	540-84-1	-2.26	Train	-2.25782	-2.30357
1-butyne	hexadecane	107-00-6	544-76-3	-2.07	Train	-2.24822	-2.39313
1-chlorobutane	1-chlorobutane	109-69-3	109-69-3	-4.34991	Train	-4.84596	-4.42288
1-chloropropane	hexadecane	540-54-5	544-76-3	-2.86	Train	-2.8609	-3.27374
1-decanol	decanol	112-30-1	112-30-1	-9.58	Train	-8.98236	-8.70384
1-decanol	hexadecane	112-30-1	544-76-3	-7.68	Train	-7.86539	-7.51089
1-decanol	octanol	112-30-1	111-87-5	-9.88	Train	-9.20594	-9.04851
1-fluorooctane	hexadecane	463-11-6	544-76-3	-5.25	Train	-4.2887	-5.2726
1-Heptanol	1-Heptanol	111-70-6	111-70-6	-7.84	Test	-7.32361	-8.52379
1-heptanol	1,2-Dibromoethane	111-70-6	106-93-4	-6.64	Train	-7.11098	-6.28564
1-heptanol	1,2-Dichlorethane	111-70-6	107-06-2	-6.79	Train	-7.22051	-6.84813
1-heptanol	benzene	111-70-6	71-43-2	-6.85	Train	-6.69768	-5.93161
1-heptanol	bromobenzene	111-70-6	108-86-1	-6.68	Test	-6.91713	-6.59577
1-heptanol	bromoform	111-70-6	75-25-2	-7.1	Test	-6.7849	-6.86866
1-heptanol	butylacetate	111-70-6	123-86-4	-7.14	Train	-7.09401	-6.97668
1-heptanol	carbon tetrachloride	111-70-6	56-23-5	-6.49	Train	-6.51093	-6.00624
1-heptanol	chlorobenzene	111-70-6	108-90-7	-6.78	Train	-6.93771	-5.4905
1-heptanol	chloroform	111-70-6	67-66-3	-7.53	Train	-6.99562	-6.66037
1-heptanol	cyclohexane	111-70-6	110-82-7	-6.02	Train	-6.38463	-6.19299
1-heptanol	decane	111-70-6	124-18-5	-5.62	Train	-6.09052	-6.06746
1-heptanol	diethylether	111-70-6	60-29-7	-7.51	Train	-6.95365	-6.9232
1-heptanol	dodecane	111-70-6	112-40-3	-5.41	Train	-5.88723	-5.2257
1-heptanol	ethylacetate	111-70-6	141-78-6	-7.56	Train	-7.28574	-7.15877
1-heptanol	ethylbenzene	111-70-6	100-41-4	-6.7	Train	-6.57019	-6.49264
1-heptanol	heptane	111-70-6	142-82-5	-5.6	Train	-6.07587	-5.91794
1-heptanol	heptanol	111-70-6	111-70-6	-7.84	Train	-7.25975	-7.20158
1-heptanol	hexadecane	111-70-6	544-76-3	-5.62	Train	-5.85506	-5.48692
1-heptanol	hexane	111-70-6	110-54-3	-5.75	Train	-6.13743	-5.97498
1-heptanol	iodobenzene	111-70-6	591-50-4	-6.53	Test	-6.83313	-6.08988
1-heptanol	nonane	111-70-6	111-84-2	-5.62	Train	-5.94675	-5.74866
1-heptanol	octane	111-70-6	111-65-9	-5.56	Test	-5.99357	-6.44189
1-heptanol	octanol	111-70-6	111-87-5	-7.75	Train	-7.19561	-8.23608
1-heptanol	1,2-dichlorobenzene	111-70-6	95-50-1	-6.5	Train	-7.05157	-6.62116
1-heptanol	pentane	111-70-6	109-66-0	-5.62	Train	-6.21882	-5.53543
1-heptanol	toluene	111-70-6	108-88-3	-6.75	Train	-6.60554	-6.54107
1-heptanol	tributylphosphate	111-70-6	126-73-8	-7.98	Train	-6.99414	-6.6229
1-heptanol	xylene (mixed isomers)	111-70-6	1330-20-7	-6.74	Train	-6.51427	-6.38256
1-hexanol	1,2-Dibromoethane	111-27-3	106-93-4	-6.08	Train	-6.44299	-6.12698
1-hexanol	1,2-Dichlorethane	111-27-3	107-06-2	-6.02	Train	-6.55252	-5.41674
1-hexanol	benzene	111-27-3	71-43-2	-6.13	Train	-6.02969	-6.85524
1-hexanol	bromobenzene	111-27-3	108-86-1	-5.92	Train	-6.24914	-5.97205
1-hexanol	bromoform	111-27-3	75-25-2	-6.2	Test	-6.11691	-6.52012
1-hexanol	butylacetate	111-27-3	123-86-4	-6.62	Train	-6.42602	-6.47118
1-hexanol	carbon tetrachloride	111-27-3	56-23-5	-5.04	Train	-5.84294	-4.89278
1-hexanol	chlorobenzene	111-27-3	108-90-7	-5.98	Train	-6.26972	-5.58131
1-hexanol	chloroform	111-27-3	67-66-3	-6.67	Train	-6.32763	-6.03665
1-hexanol	cyclohexane	111-27-3	110-82-7	-5.31	Train	-5.71664	-5.56927
1-hexanol	decane	111-27-3	124-18-5	-4.97	Train	-5.42253	-5.49557
1-hexanol	diethylether	111-27-3	60-29-7	-6.82	Train	-6.28566	-6.29948
1-hexanol	dodecane	111-27-3	112-40-3	-4.28	Test	-5.21923	-4.18411
1-hexanol	ethylacetate	111-27-3	141-78-6	-6.92	Test	-6.61775	-6.73242
1-hexanol	ethylbenzene	111-27-3	100-41-4	-5.68	Train	-5.9022	-5.86892
1-hexanol	heptane	111-27-3	142-82-5	-4.89	Train	-5.40788	-5.29422
1-hexanol	hexadecane	111-27-3	544-76-3	-4.92	Train	-5.18707	-4.98092
1-hexanol	hexane	111-27-3	110-54-3	-5.14	Train	-5.46944	-4.84289
1-hexanol	hexanol	111-27-3	111-27-3	-7.05	Test	-6.64853	-5.77806
1-hexanol	iodobenzene	111-27-3	591-50-4	-5.71	Train	-6.16514	-5.95014
1-hexanol	isooctane	111-27-3	540-84-1	-5.1	Test	-5.10237	-4.85258
1-hexanol	nonane	111-27-3	111-84-2	-4.97	Train	-5.27876	-5.42569
1-hexanol	octane	111-27-3	111-65-9	-4.86	Train	-5.32558	-5.17733
1-hexanol	octanol	111-27-3	111-87-5	-7.06	Train	-6.52762	-6.53952
1-hexanol	1,2-dichlorobenzene	111-27-3	95-50-1	-5.7	Train	-6.38358	-5.99744
1-hexanol	pentane	111-27-3	109-66-0	-4.97	Train	-5.55082	-5.12494
1-hexanol	toluene	111-27-3	108-88-3	-6.12	Train	-5.93755	-5.90289
1-hexanol	xylene (mixed isomers)	111-27-3	1330-20-7	-5.85	Train	-5.84628	-5.75885
1-hexene	hexadecane	592-41-6	544-76-3	-3.51	Train	-3.64763	-3.65022
1-hexyne	hexadecane	693-02-7	544-76-3	-3.42	Train	-3.59065	-3.50559
1-nitrobutane	hexadecane	627-05-4	544-76-3	-4.66	Train	-4.95545	-4.05948
1-nitrobutane	hexane	627-05-4	110-54-3	-4.64	Train	-5.23782	-5.15214
1-nitropropane	1-nitropropane	108-03-2	108-03-2	-5.87716	Test	-5.91436	-5.60831
1-nitropropane	carbondisulfide	108-03-2	75-15-0	-4.5	Train	-4.78058	-4.60864
1-nitropropane	carbon tetrachloride	108-03-2	56-23-5	-4.49	Test	-4.37604	-4.55084
1-nitropropane	cyclohexane	108-03-2	110-82-7	-4.06	Train	-4.24974	-4.40723
1-nitropropane	hexadecane	108-03-2	544-76-3	-3.95	Train	-3.72017	-3.77976
1-nitropropane	isooctane	108-03-2	540-84-1	-3.94	Train	-3.63548	-4.52535
1-nitropropane	octane	108-03-2	111-65-9	-3.95	Train	-3.85868	-3.21906
1-nitropropane	octanol	108-03-2	111-87-5	-4.44	Train	-5.06072	-5.25984
1-nitropropane	toluene	108-03-2	108-88-3	-5.25	Train	-4.47066	-4.26743
1-Nonanol	1-Nonanol	143-08-8	143-08-8	-9.05	Train	-8.49075	-8.1962
1-nonanol	nonanol	143-08-8	143-08-8	-9.05	Test	-8.39917	-8.1962
1-octanol	benzene	111-87-5	71-43-2	-8.06	Test	-7.36527	-7.27494
1-octanol	butylacetate	111-87-5	123-86-4	-8.17	Train	-7.7616	-7.08107
1-octanol	diethylether	111-87-5	60-29-7	-7.25	Test	-7.62123	-7.54577
1-octanol	ethylacetate	111-87-5	141-78-6	-8.41	Test	-7.95332	-7.78134
1-octanol	hexadecane	111-87-5	544-76-3	-6.3	Train	-6.52264	-6.82934
1-octanol	octanol	111-87-5	111-87-5	-8.13	Test	-7.86319	-7.7858
1-pentanol	1-pentanol	71-41-0	71-41-0	-6.63481	Train	-6.15269	-6.11585
1-pentanol	1,2-Dibromoethane	71-41-0	106-93-4	-5.44	Train	-5.77449	-5.70795
1-pentanol	1,2-Dichlorethane	71-41-0	107-06-2	-5.45	Train	-5.88402	-5.50682
1-pentanol	benzene	71-41-0	71-43-2	-5.1	Train	-5.36119	-4.81797
1-pentanol	bromobenzene	71-41-0	108-86-1	-5.06	Train	-5.58063	-6.10839
1-pentanol	bromoform	71-41-0	75-25-2	-5.34	Train	-5.44841	-4.99481
1-pentanol	butylacetate	71-41-0	123-86-4	-5.78	Train	-5.75752	-5.83565
1-pentanol	carbon tetrachloride	71-41-0	56-23-5	-4.73	Train	-5.17444	-4.83514
1-pentanol	chlorobenzene	71-41-0	108-90-7	-5.25	Train	-5.60122	-4.63768
1-pentanol	chloroform	71-41-0	67-66-3	-5.9	Train	-5.65913	-5.41485
1-pentanol	decane	71-41-0	124-18-5	-3.92	Test	-4.75403	-4.50314
1-pentanol	diethylether	71-41-0	60-29-7	-6.11	Train	-5.61715	-6.14624
1-pentanol	dodecane	71-41-0	112-40-3	-4.09	Train	-4.55073	-4.43708
1-pentanol	ethylacetate	71-41-0	141-78-6	-6.13	Train	-5.94924	-6.02865
1-pentanol	ethylbenzene	71-41-0	100-41-4	-4.72	Test	-5.23369	-4.87185
1-pentanol	heptane	71-41-0	142-82-5	-4.09	Train	-4.73938	-4.94352
1-pentanol	hexadecane	71-41-0	544-76-3	-4.24	Train	-4.51856	-4.65191
1-pentanol	hexane	71-41-0	110-54-3	-4.38	Train	-4.80094	-4.72946
1-pentanol	iodobenzene	71-41-0	591-50-4	-5.02	Test	-5.49664	-4.7316
1-pentanol	isooctane	71-41-0	540-84-1	-4.17	Test	-4.43387	-4.19617
1-pentanol	nonane	71-41-0	111-84-2	-3.92	Train	-4.61025	-4.80389
1-pentanol	octane	71-41-0	111-65-9	-4.1	Train	-4.65708	-4.16922
1-pentanol	octanol	71-41-0	111-87-5	-6.4	Train	-5.85911	-6.62019
1-pentanol	1,2-dichlorobenzene	71-41-0	95-50-1	-4.93	Train	-5.71508	-4.91391
1-pentanol	pentane	71-41-0	109-66-0	-3.92	Test	-4.88232	-4.82194
1-pentanol	toluene	71-41-0	108-88-3	-5.17	Train	-5.26905	-5.29555
1-pentanol	tributylphosphate	71-41-0	126-73-8	-6.69	Train	-5.65764	-5.37738
1-pentanol	xylene (mixed isomers)	71-41-0	1330-20-7	-4.72	Train	-5.17778	-4.37312
1-pentene	hexadecane	109-67-1	544-76-3	-2.79	Train	-2.98028	-2.61241
1-pentene	isooctane	109-67-1	540-84-1	-2.36	Train	-2.89558	-2.89359
1-pentyne	hexadecane	627-19-0	544-76-3	-2.74	Train	-2.91792	-3.02278
1-propanethiol	cyclohexane	107-03-9	110-82-7	-3.12	Train	-3.7868	-2.94779
1-propanethiol	hexadecane	107-03-9	544-76-3	-3.66	Train	-3.25723	-3.11061
1-propanethiol	isooctane	107-03-9	540-84-1	-3.78	Test	-3.17253	-4.36022
1-propanol	1-propanol	71-23-8	71-23-8	-5.55928	Train	-5.06947	-5.09426
1-propanol	1,2-Dibromoethane	71-23-8	106-93-4	-3.82	Test	-4.43764	-4.81745
1-propanol	1,2-Dichlorethane	71-23-8	107-06-2	-3.85	Train	-4.54717	-4.0813
1-Propanol	acetonitrile	71-23-8	75-05-8	-4.65	Train	-4.72798	-4.49212
1-propanol	benzene	71-23-8	71-43-2	-3.87	Train	-4.02434	-4.17049
1-propanol	bromobenzene	71-23-8	108-86-1	-3.74	Test	-4.24379	-3.46545
1-propanol	bromoform	71-23-8	75-25-2	-4.03	Train	-4.11156	-3.75845
1-propanol	butylacetate	71-23-8	123-86-4	-4.52	Train	-4.42067	-4.4948
1-propanol	carbon tetrachloride	71-23-8	56-23-5	-3.64	Train	-3.83759	-4.54571
1-propanol	chlorobenzene	71-23-8	108-90-7	-3.82	Test	-4.26437	-3.65163
1-propanol	chloroform	71-23-8	67-66-3	-4.41	Train	-4.32228	-3.84909
1-propanol	cyclohexane	71-23-8	110-82-7	-2.73	Train	-3.71129	-3.08628
1-propanol	decane	71-23-8	124-18-5	-2.76	Train	-3.41718	-2.14824
1-propanol	diethylether	71-23-8	60-29-7	-4.9	Train	-4.28031	-6.07921
1-Propanol	DMSO	71-23-8	67-68-5	-5.68	Train	-5.03355	-4.87667
1-propanol	dodecane	71-23-8	112-40-3	-2.74	Train	-3.21389	-3.20073
1-propanol	ethylacetate	71-23-8	141-78-6	-4.9	Test	-4.6124	-5.01261
1-propanol	ethylbenzene	71-23-8	100-41-4	-3.71	Train	-3.89685	-3.67953
1-propanol	heptane	71-23-8	142-82-5	-3.01	Train	-3.40253	-2.89499
1-propanol	hexadecane	71-23-8	544-76-3	-2.77	Train	-3.18172	-3.14373
1-propanol	hexane	71-23-8	110-54-3	-2.81	Train	-3.46409	-3.4931
1-propanol	iodobenzene	71-23-8	591-50-4	-3.52	Test	-4.15979	-4.32578
1-propanol	isooctane	71-23-8	540-84-1	-3	Train	-3.09702	-2.91571
1-Propanol	methanol	71-23-8	67-56-1	-4.75	Test	-5.4221	-4.88997
1-propanol	nonane	71-23-8	111-84-2	-2.76	Test	-3.27341	-3.26678
1-propanol	octane	71-23-8	111-65-9	-2.76	Test	-3.32023	-3.56753
1-propanol	octanol	71-23-8	111-87-5	-5.02	Train	-4.52227	-4.41052
1-propanol	1,2-dichlorobenzene	71-23-8	95-50-1	-3.47	Train	-4.37823	-4.13928
1-propanol	pentane	71-23-8	109-66-0	-2.76	Train	-3.54548	-3.05856
1-propanol	propanol	71-23-8	71-23-8	-5.29	Train	-4.99867	-5.09426
1-propanol	toluene	71-23-8	108-88-3	-3.71	Train	-3.9322	-4.01076
1-propanol	tributylphosphate	71-23-8	126-73-8	-5.42	Test	-4.3208	-5.35545
1-propanol	xylene (mixed isomers)	71-23-8	1330-20-7	-3.57	Train	-3.84093	-3.2598
2,2,2-trifluoroethanol	2,2,2-trifluoroethanol	75-89-8	75-89-8	-4.81597	Test	-4.88947	-4.5932
2,2,2-trifluoroethanol	octanol	75-89-8	111-87-5	-4.81	Train	-4.41665	-4.30853
isooctane	isooctane	540-84-1	540-84-1	-4.57935	Train	-4.09401	-4.30847
isooctane	hexadecane	540-84-1	544-76-3	-4.24	Train	-4.15447	-4.38009
2,2'-dichlorobiphenyl	heptane	13029-08-8	142-82-5	-9.22	Train	-8.80905	-9.19219
2,2'-dichlorobiphenyl	octanol	13029-08-8	111-87-5	-9.41	Train	-9.92878	-10.4375
2,2-dichloroethenyl dimethyl phosphate	benzene	62-73-7	71-43-2	-9.09	Train	-8.13001	-7.07613
2,2-dichloroethenyl dimethyl phosphate	octanol	62-73-7	111-87-5	-8.59	Train	-8.62793	-7.58699
2,2-dimethylpropane	hexadecane	463-82-1	544-76-3	-2.48	Train	-1.96188	-3.31612
2,3-butanediol	2,3-butanediol	5341-95-7	5341-95-7	-7.81072	Train	-6.9939	-6.70144
2,3-dichlorobiphenyl	octanol	16605-91-7	111-87-5	-9.23	Train	-9.93118	-10.5423
2,4,6-trimethylpyridine	2,4,6-trimethylpyridine	108-75-8	108-75-8	-6.92161	Test	-7.26626	-7.41362
2,4-dimethylpentane	hexadecane	108-08-7	544-76-3	-3.87	Train	-3.49228	-4.14919
2,4-dimethylphenol	2,4-dimethylphenol	105-67-9	105-67-9	-8.14771	Train	-8.53018	-8.7957
2,4-dimethylpyridine	2,4-dimethylpyridine	108-47-4	108-47-4	-6.45555	Train	-6.69234	-6.66823
2,4-dimethylpyridine	hexadecane	108-47-4	544-76-3	-5.52	Train	-5.07808	-5.45223
2,5-dimethylpyridine	hexadecane	589-93-5	544-76-3	-5.52	Test	-4.94649	-5.22004
2,6-dichlorobenzonitrile	octanol	1194-65-6	111-87-5	-9.18	Train	-8.36643	-8.54023
2,6-dimethylpyridine	2,6-dimethylpyridine	108-48-5	108-48-5	-6.07792	Train	-6.18605	-6.51223
2,6-dimethylpyridine	benzene	108-48-5	71-43-2	-6.39	Train	-5.63723	-5.77724
2,6-dimethylpyridine	cyclohexane	108-48-5	110-82-7	-5.51	Train	-5.32418	-5.23183
2,6-dimethylpyridine	dimethylpyridine	108-48-5	108-48-5	-6.04	Train	-6.07995	-6.31855
2,6-dimethylpyridine	hexadecane	108-48-5	544-76-3	-5.27	Train	-4.79461	-5.11492
2-butanol	2-butanol	78-92-2	78-92-2	-5.51387	Train	-5.59905	-5.70356
butanone	2methylpyridine	78-93-3	109-06-8	-4.52	Train	-4.91447	-4.77616
butanone	aceticacid	78-93-3	64-19-7	-4.8	Train	-5.14601	-5.40562
butanone	acetonitrile	78-93-3	75-05-8	-4.73	Train	-5.37418	-3.76952
butanone	acetophenone	78-93-3	98-86-2	-4.39	Train	-5.05449	-4.82885
butanone	aniline	78-93-3	62-53-3	-4.87	Train	-5.13494	-4.00454
butanone	anisole	78-93-3	100-66-3	-4.43	Train	-4.5137	-4.22135
butanone	benzene	78-93-3	71-43-2	-4.46	Train	-4.22043	-4.73422
butanone	benzonitrile	78-93-3	100-47-0	-4.58	Train	-5.32901	-4.85827
butanone	benzylalcohol	78-93-3	100-51-6	-4.57	Train	-5.07682	-5.95067
butanone	bromobenzene	78-93-3	108-86-1	-4.37	Train	-4.43987	-4.16503
butanone	bromoethane	78-93-3	106-93-4	-5.13	Train	-4.63372	-5.41539
butanone	butanol	78-93-3	71-36-3	-4.12	Train	-5.06226	-4.0619
butanone	butanone	78-93-3	78-93-3	-4.5	Train	-5.06287	-4.32135
butanone	carbondisulfide	78-93-3	75-15-0	-3.85	Train	-4.43821	-3.9755
butanone	carbon tetrachloride	78-93-3	56-23-5	-4.09	Test	-4.03367	-4.67242
butanone	chlorobenzene	78-93-3	108-90-7	-4.47	Train	-4.46045	-4.13799
butanone	chloroform	78-93-3	67-66-3	-5.43	Train	-4.51837	-4.22963
butanone	chlorohexane	78-93-3	544-10-5	-4.1	Train	-3.85115	-3.66335
butanone	cyclohexane	78-93-3	110-82-7	-3.48	Train	-3.90737	-3.76225
butanone	cyclohexanone	78-93-3	108-94-1	-4.42	Train	-5.15334	-5.09273
butanone	decane	78-93-3	124-18-5	-3.3	Train	-3.61326	-3.49462
butanone	dibutylether	78-93-3	142-96-1	-3.78	Test	-4.12459	-4.52858
butanone	diethylether	78-93-3	60-29-7	-4.09	Train	-4.47639	-4.49246
butanone	diisopropylether	78-93-3	108-20-3	-3.96	Test	-4.30573	-4.39882
butanone	dimethylpyridine	78-93-3	108-48-5	-4.34	Test	-4.66314	-4.64791
butanone	Diphenylether	78-93-3	101-84-8	-4.08	Train	-4.26468	-4.24044
butanone	ethanol	78-93-3	64-17-5	-4.32	Train	-5.34964	-5.21853
butanone	ethoxybenzene	78-93-3	103-73-1	-4.28	Train	-4.18794	-3.847
butanone	ethylbenzene	78-93-3	100-41-4	-4.12	Train	-4.09293	-4.18548
butanone	fluorobenzene	78-93-3	462-06-6	-4.6	Train	-4.50218	-4.71277
butanone	heptane	78-93-3	142-82-5	-3.36	Train	-3.59861	-3.45155
butanone	hexadecane	78-93-3	544-76-3	-3.12	Train	-3.3778	-4.22896
butanone	hexane	78-93-3	110-54-3	-3.48	Train	-3.66017	-3.38202
butanone	iodobenzene	78-93-3	591-50-4	-4.22	Train	-4.35588	-4.14311
butanone	isooctane	78-93-3	540-84-1	-3.4	Train	-3.29311	-3.01095
butanone	isopropylbenzene	78-93-3	98-82-8	-4.02	Train	-3.93386	-3.46275
butanone	mcresol	78-93-3	108-39-4	-5.98	Train	-4.9101	-5.94502
butanone	mesitylene	78-93-3	108-67-8	-3.95	Train	-3.20518	-3.72221
butanone	nitroethane	78-93-3	79-24-3	-4.73	Train	-5.49269	-5.03521
butanone	nitromethane	78-93-3	75-52-5	-4.72	Train	-5.69924	-5.18609
butanone	nonane	78-93-3	111-84-2	-3.2	Train	-3.46949	-3.31792
butanone	octane	78-93-3	111-65-9	-3.24	Train	-3.51631	-3.37583
butanone	octanol	78-93-3	111-87-5	-3.78	Train	-4.71835	-4.73249
butanone	propanol	78-93-3	71-23-8	-4.15	Train	-5.19475	-5.14539
butanone	pyridine	78-93-3	110-86-1	-4.61	Train	-5.13387	-4.85349
butanone	tbutylbenzene	78-93-3	98-06-6	-3.94	Train	-3.8593	-3.58626
butanone	tetrahydrofuran	78-93-3	109-99-9	-4.54	Train	-4.92457	-4.44523
butanone	tetrahydrothiophenedioxide	78-93-3	126-33-0	-4.09	Train	-4.69656	-6.18048
butanone	tetralin	78-93-3	119-64-2	-3.12	Train	-4.1063	-3.19487
butanone	toluene	78-93-3	108-88-3	-4.27	Train	-4.12829	-3.87379
butanone	triethylamine	78-93-3	121-44-8	-3.86	Train	-4.27159	-4.50173
butanone	trimethylbenzene	78-93-3	526-73-8	-3.97	Test	-4.07792	-3.71247
butanone	xylene (mixed isomers)	78-93-3	1330-20-7	-4.23	Test	-4.03702	-7.43084
2-chloroethanol	2-chloroethanol	107-07-3	107-07-3	-6.011	Test	-6.05932	-6.54825
2-chloropropane	hexadecane	75-29-6	544-76-3	-2.69	Train	-2.9378	-3.00605
2-ethoxyethanol	2-ethoxyethanol	110-80-5	110-80-5	-6.21416	Train	-6.36285	-6.15322
2-ethylpyrazine	dibutylether	13925-00-3	142-96-1	-5.87	Train	-5.6638	-5.97604
2-ethylpyrazine	octane	13925-00-3	111-65-9	-5.51	Train	-5.05552	-5.30461
2-ethylpyrazine	octanol	13925-00-3	111-87-5	-6.4	Train	-6.25756	-6.00351
2-heptanone	2-heptanone	110-43-0	110-43-0	-6.18548	Test	-7.00323	-6.44102
2-heptanone	benzene	110-43-0	71-43-2	-6.36	Train	-6.3051	-6.25979
2-heptanone	butylbenzene	110-43-0	104-51-8	-5.93	Train	-5.94958	-5.75468
2-heptanone	carbon tetrachloride	110-43-0	56-23-5	-6.12	Test	-6.11835	-5.91736
2-heptanone	chlorobenzene	110-43-0	108-90-7	-6.46	Train	-6.54513	-6.01739
2-heptanone	cyclohexane	110-43-0	110-82-7	-5.47	Train	-5.99205	-5.92591
2-heptanone	decane	110-43-0	124-18-5	-5.18	Train	-5.69794	-5.38835
2-heptanone	ethylbenzene	110-43-0	100-41-4	-6.1	Train	-6.1776	-6.64525
2-heptanone	heptane	110-43-0	142-82-5	-5.22	Test	-5.68329	-4.95807
2-heptanone	hexadecane	110-43-0	544-76-3	-5.13	Train	-5.46248	-5.07427
2-heptanone	hexane	110-43-0	110-54-3	-5.36	Train	-5.74485	-5.42364
2-heptanone	isopropylbenzene	110-43-0	98-82-8	-5.99	Train	-6.01854	-5.83309
2-heptanone	mesitylene	110-43-0	108-67-8	-5.99	Train	-5.28985	-5.09846
2-heptanone	nonane	110-43-0	111-84-2	-5.24	Test	-5.55416	-5.64312
2-heptanone	octane	110-43-0	111-65-9	-5.25	Train	-5.60099	-5.46848
2-heptanone	pentane	110-43-0	109-66-0	-5.4	Train	-5.82623	-5.49807
2-heptanone	perfluorobenzene	110-43-0	392-56-3	-6.15	Train	-6.18521	-6.11072
2-heptanone	tbutylbenzene	110-43-0	98-06-6	-5.88	Train	-5.94397	-5.73566
2-heptanone	tetralin	110-43-0	119-64-2	-5.33	Train	-6.19098	-5.13454
2-heptanone	toluene	110-43-0	108-88-3	-6.3	Train	-6.21296	-6.24818
2-heptanone	trimethylbenzene	110-43-0	526-73-8	-6.01	Train	-6.16259	-5.62698
2-heptanone	xylene (mixed isomers)	110-43-0	1330-20-7	-6.15	Train	-6.12169	-5.83122
2-hexanone	benzene	591-78-6	71-43-2	-5.76	Test	-5.63686	-5.33777
2-hexanone	butylbenzene	591-78-6	104-51-8	-5.31	Test	-5.28133	-5.82355
2-hexanone	carbon tetrachloride	591-78-6	56-23-5	-5.47	Test	-5.4501	-5.32198
2-hexanone	chlorobenzene	591-78-6	108-90-7	-5.84	Train	-5.87688	-5.96295
2-hexanone	chlorohexane	591-78-6	544-10-5	-5.42	Train	-5.26758	-4.14102
2-hexanone	cyclohexane	591-78-6	110-82-7	-4.77	Train	-5.3238	-5.02091
2-hexanone	decane	591-78-6	124-18-5	-4.61	Train	-5.02969	-4.89539
2-hexanone	ethylbenzene	591-78-6	100-41-4	-5.49	Train	-5.50936	-5.32057
2-hexanone	heptane	591-78-6	142-82-5	-4.55	Train	-5.01504	-5.35747
2-hexanone	hexadecane	591-78-6	544-76-3	-4.45	Train	-4.79423	-6.09687
2-hexanone	hexane	591-78-6	110-54-3	-4.68	Test	-5.0766	-4.40488
2-hexanone	isooctane	591-78-6	540-84-1	-4.72	Train	-4.70954	-4.47752
2-hexanone	isopropylbenzene	591-78-6	98-82-8	-5.39	Train	-5.35029	-4.98679
2-hexanone	mesitylene	591-78-6	108-67-8	-5.34	Train	-4.62161	-4.47772
2-hexanone	nonane	591-78-6	111-84-2	-4.59	Train	-4.88592	-3.9277
2-hexanone	octane	591-78-6	111-65-9	-4.6	Train	-4.93274	-4.19055
2-hexanone	pentane	591-78-6	109-66-0	-4.79	Train	-5.15799	-4.87734
2-hexanone	perfluorobenzene	591-78-6	392-56-3	-5.55	Train	-5.51697	-5.7731
2-hexanone	tbutylbenzene	591-78-6	98-06-6	-5.27	Train	-5.27573	-5.43929
2-hexanone	tetralin	591-78-6	119-64-2	-4.64	Train	-5.52273	-3.60443
2-hexanone	toluene	591-78-6	108-88-3	-5.6	Train	-5.54472	-5.369
2-hexanone	trimethylbenzene	591-78-6	526-73-8	-5.39	Train	-5.49435	-5.33166
2-hexanone	xylene (mixed isomers)	591-78-6	1330-20-7	-5.49	Train	-5.45344	-5.21049
2-methoxyethanol	2-methoxyethanol	109-86-4	109-86-4	-5.97754	Train	-6.03366	-5.86837
2-methoxyethanol	decanol	109-86-4	112-30-1	-5.41	Train	-4.87273	-5.07441
2-methoxyethanol	diethylether	109-86-4	60-29-7	-5.12	Train	-4.85435	-4.81559
2-methoxyethanol	nonanol	109-86-4	143-08-8	-5.61	Train	-4.966	-5.08236
2-methoxyethanol	octanol	109-86-4	111-87-5	-5.83	Train	-5.09631	-5.35216
2-methoxyethanol	tributylphosphate	109-86-4	126-73-8	-6.14	Test	-4.89483	-6.19613
2-methoxyphenol	2-methoxyphenol	90-05-1	90-05-1	-8.13576	Train	-8.81798	-8.54853
2-methyl tetrahydrofuran	2-methyl tetrahydrofuran	96-47-9	96-47-9	-4.48853	Train	-3.69284	-3.53398
2-nitrotoluene	carbon tetrachloride	88-72-2	56-23-5	-7.49	Test	-7.067	-7.52698
2-nitrotoluene	chloroform	88-72-2	67-66-3	-8.3	Train	-7.55169	-7.73312
2-nitrotoluene	cyclohexane	88-72-2	110-82-7	-6.71	Test	-6.9407	-7.01728
2-nitrotoluene	diethylether	88-72-2	60-29-7	-7.21	Train	-7.50972	-7.99595
2-nitrotoluene	hexadecane	88-72-2	544-76-3	-6.52	Test	-6.41113	-6.69836
2-nitrotoluene	2-nitrotoluene	88-72-2	88-72-2	-8.04	Train	-8.00725	-8.04385
isobutanol	isobutanol	78-83-1	78-83-1	-5.85565	Train	-5.54536	-5.6714
2-methylaniline	benzene	95-53-4	71-43-2	-7.37	Train	-6.98293	-7.15374
2-methylaniline	carbon tetrachloride	95-53-4	56-23-5	-7.16	Train	-6.79618	-6.9556
2-methylaniline	chloroform	95-53-4	67-66-3	-8.23	Train	-7.28087	-7.16174
2-methylaniline	cyclohexane	95-53-4	110-82-7	-6.44	Train	-6.66988	-6.69436
2-methylaniline	heptane	95-53-4	142-82-5	-6.28	Test	-6.36112	-6.24537
2-methylaniline	hexadecane	95-53-4	544-76-3	-6.08	Train	-6.14031	-6.6152
2-methylaniline	octane	95-53-4	111-65-9	-6.06	Train	-6.27882	-5.43373
2-methylaniline	octanol	95-53-4	111-87-5	-7.36	Test	-7.48086	-7.6646
2-methylbutane	2-methylbutane	78-78-4	78-78-4	-3.2218	Train	-2.46359	-3.09168
2-methylpentane	hexadecane	107-83-5	544-76-3	-3.48	Train	-2.63786	-3.04154
o-cresol	o-cresol	95-48-7	95-48-7	-7.8633	Train	-8.01865	-8.13496
2-methylpropane	hexadecane	75-28-5	544-76-3	-1.92	Train	-1.2291	-2.57989
2-methylpropane	octanol	75-28-5	111-87-5	-1.45	Train	-2.56965	-3.32467
2-methylpropene	carbon tetrachloride	115-11-7	56-23-5	-2.63	Train	-3.08476	-2.45706
2-methylpyrazine	dibutylether	109-08-0	142-96-1	-5.12	Train	-5.04489	-4.7891
2-methylpyrazine	octane	109-08-0	111-65-9	-4.7	Train	-4.43661	-4.73347
2-methylpyrazine	octanol	109-08-0	111-87-5	-5.87	Test	-5.63865	-6.07853
2-methylpyridine	2-methylpyridine	109-06-8	109-06-8	-5.71	Train	-5.67051	-5.6305
2-methylpyridine	benzene	109-06-8	71-43-2	-5.86	Train	-4.97647	-6.80801
2-methylpyridine	cyclohexane	109-06-8	110-82-7	-5.05	Test	-4.66342	-5.97839
2-methylpyridine	dibutylether	109-06-8	142-96-1	-5.2	Test	-4.88064	-5.06312
2-methylpyridine	hexadecane	109-06-8	544-76-3	-4.68	Test	-4.13385	-4.89321
2-methylpyridine	octanol	109-06-8	111-87-5	-6.14	Train	-5.4744	-4.4888
2-nitropropane	2-nitropropane	79-46-9	79-46-9	-5.53538	Train	-6.12261	-5.58106
2-nitropropane	hexadecane	79-46-9	544-76-3	-3.47	Train	-4.05313	-3.97034
2-nitrotoluene	2-nitrotoluene	88-72-2	88-72-2	-8.04	Train	-8.4259	-8.04385
2-octanone	heptane	111-13-7	142-82-5	-5.68	Train	-6.2625	-6.21315
2-octanone	hexadecane	111-13-7	544-76-3	-5.81	Train	-6.04169	-5.70907
2-octanone	octanol	111-13-7	111-87-5	-6.38	Train	-7.38224	-7.21589
2-pentanone	2-pentanone	107-87-9	107-87-9	-5.04064	Train	-5.84166	-5.45241
2-pentanone	benzene	107-87-9	71-43-2	-5.14	Test	-4.88529	-5.74495
2-pentanone	butylbenzene	107-87-9	104-51-8	-4.74	Test	-4.52977	-4.58248
2-pentanone	carbon tetrachloride	107-87-9	56-23-5	-4.81	Train	-4.69854	-4.64476
2-pentanone	chlorobenzene	107-87-9	108-90-7	-5.29	Train	-5.12532	-4.75925
2-pentanone	chlorohexane	107-87-9	544-10-5	-4.84	Train	-4.51602	-4.52441
2-pentanone	cyclohexane	107-87-9	110-82-7	-4.19	Train	-4.57224	-4.30257
2-pentanone	decane	107-87-9	124-18-5	-3.93	Train	-4.27813	-5.01427
2-pentanone	ethylbenzene	107-87-9	100-41-4	-4.85	Train	-4.7578	-4.68316
2-pentanone	heptane	107-87-9	142-82-5	-4.07	Train	-4.26348	-3.9429
2-pentanone	hexadecane	107-87-9	544-76-3	-3.76	Test	-4.04267	-3.81613
2-pentanone	isooctane	107-87-9	540-84-1	-4.14	Test	-3.95797	-3.63221
2-pentanone	isopropylbenzene	107-87-9	98-82-8	-4.84	Train	-4.59873	-4.56514
2-pentanone	mesitylene	107-87-9	108-67-8	-4.8	Test	-3.87005	-4.31073
2-pentanone	nonane	107-87-9	111-84-2	-3.97	Train	-4.13436	-3.93918
2-pentanone	octane	107-87-9	111-65-9	-3.97	Train	-4.18118	-3.99709
2-pentanone	pentane	107-87-9	109-66-0	-4.16	Test	-4.40643	-2.99498
2-pentanone	perfluorobenzene	107-87-9	392-56-3	-5.1	Test	-4.76541	-5.40685
2-pentanone	tbutylbenzene	107-87-9	98-06-6	-4.72	Train	-4.52416	-4.48124
2-pentanone	tetralin	107-87-9	119-64-2	-3.99	Train	-4.77117	-4.85022
2-pentanone	toluene	107-87-9	108-88-3	-5.02	Train	-4.79315	-5.208
2-pentanone	trimethylbenzene	107-87-9	526-73-8	-4.83	Train	-4.74278	-4.39574
2-pentanone	xylene (mixed isomers)	107-87-9	1330-20-7	-4.87	Train	-4.70188	-4.57309
2-pentene	carbon tetrachloride	627-20-3	56-23-5	-3.46	Train	-3.76576	-4.30516
isopropanol	isopropanol	67-63-0	67-63-0	-5.08605	Train	-5.00147	-5.12225
isopropanol	acetonitrile	67-63-0	75-05-8	-4.39	Train	-4.70849	-4.44244
isopropanol	DMSO	67-63-0	67-68-5	-5.14	Test	-5.01406	-4.88229
isopropanol	methanol	67-63-0	67-56-1	-4.53	Train	-5.40261	-5.2145
3,3-dimethylbutanone	butylbenzene	75-97-8	104-51-8	-4.77	Train	-5.28442	-5.20577
3,3-dimethylbutanone	chlorobenzene	75-97-8	108-90-7	-5.25	Train	-5.87997	-6.68193
3,3-dimethylbutanone	chlorohexane	75-97-8	544-10-5	-4.98	Train	-5.27067	-5.27436
3,3-dimethylbutanone	cyclohexane	75-97-8	110-82-7	-4.42	Test	-5.32689	-4.2486
3,3-dimethylbutanone	decane	75-97-8	124-18-5	-4.15	Train	-5.03278	-4.06645
3,3-dimethylbutanone	ethylbenzene	75-97-8	100-41-4	-4.92	Test	-5.51245	-5.39239
3,3-dimethylbutanone	heptane	75-97-8	142-82-5	-4.3	Test	-5.01813	-5.53711
3,3-dimethylbutanone	hexadecane	75-97-8	544-76-3	-3.94	Train	-4.79732	-3.85626
3,3-dimethylbutanone	hexane	75-97-8	110-54-3	-4.34	Train	-5.07969	-4.87473
3,3-dimethylbutanone	isopropylbenzene	75-97-8	98-82-8	-4.81	Train	-5.35338	-4.35342
3,3-dimethylbutanone	mesitylene	75-97-8	108-67-8	-4.77	Train	-4.6247	-4.54954
3,3-dimethylbutanone	nonane	75-97-8	111-84-2	-4.19	Test	-4.88901	-4.20081
3,3-dimethylbutanone	octane	75-97-8	111-65-9	-4.21	Test	-4.93583	-4.79032
3,3-dimethylbutanone	pentane	75-97-8	109-66-0	-4.43	Train	-5.16108	-4.94916
3,3-dimethylbutanone	perfluorobenzene	75-97-8	392-56-3	-5.26	Train	-5.52006	-4.52552
3,3-dimethylbutanone	tbutylbenzene	75-97-8	98-06-6	-4.79	Train	-5.27882	-5.18674
3,3-dimethylbutanone	toluene	75-97-8	108-88-3	-5	Train	-5.54781	-6.00968
3,3-dimethylbutanone	trimethylbenzene	75-97-8	526-73-8	-4.8	Train	-5.49744	-3.52326
3,3-dimethylbutanone	xylene (mixed isomers)	75-97-8	1330-20-7	-4.91	Train	-5.45653	-5.28231
3-bromopyridine	3-bromopyridine	626-55-1	626-55-1	-6.88337	Test	-7.65061	-6.81626
3-chloropropene	hexadecane	107-05-1	544-76-3	-2.88	Train	-3.52385	-3.47108
3-ethyl-2-methoxypyrazine	octanol	25680-58-4	111-87-5	-6.85	Train	-7.39949	-5.58608
3-methylaniline	benzene	108-44-1	71-43-2	-7.61	Train	-7.06454	-7.19769
3-methylaniline	carbon tetrachloride	108-44-1	56-23-5	-7.23	Train	-6.87779	-7.40176
3-methylaniline	cyclohexane	108-44-1	110-82-7	-6.47	Train	-6.75149	-6.73831
3-methylaniline	heptane	108-44-1	142-82-5	-6.35	Train	-6.44273	-6.46326
3-methylaniline	octane	108-44-1	111-65-9	-6.15	Train	-6.36043	-6.55429
3-methylaniline	octanol	108-44-1	111-87-5	-7.57	Train	-7.56246	-7.70855
m-cresol	m-cresol	108-39-4	108-39-4	-8.31502	Train	-7.94322	-8.11364
3-methylpyridine	3-methylpyridine	108-99-6	108-99-6	-6.13289	Train	-6.07344	-6.05029
3-methylpyridine	cyclohexane	108-99-6	110-82-7	-5.14	Train	-4.80563	-5.35126
3-methylpyridine	hexadecane	108-99-6	544-76-3	-4.91	Train	-4.27606	-4.46588
3-methylpyridine	octanol	108-99-6	111-87-5	-6.4	Train	-5.61661	-5.91771
3-pentanone	3-pentanone	96-22-0	96-22-0	-5.02152	Train	-5.65284	-5.26838
3-pentanone	cyclohexane	96-22-0	110-82-7	-4.3	Train	-4.45695	-4.26933
3-pentanone	hexadecane	96-22-0	544-76-3	-3.83	Train	-3.92738	-3.70195
3-pentanone	octanol	96-22-0	111-87-5	-4.36	Train	-5.26793	-5.23957
g-butyrolactone	g-butyrolactone	96-48-0	96-48-0	-6.65393	Train	-5.90141	-5.43454
4-heptanone	hexadecane	123-19-3	544-76-3	-5.2	Train	-5.22506	-4.9183
4-methyl-2-pentanone	4methyl2pentanone	108-10-1	108-10-1	-5.23	Test	-6.22084	-5.9602
4-methylaniline	benzene	106-49-0	71-43-2	-7.59	Train	-7.23179	-7.67402
4-methylaniline	bromobenzene	106-49-0	108-86-1	-7.59	Test	-7.45123	-7.4934
4-methylaniline	butylacetate	106-49-0	123-86-4	-7.81	Train	-7.62811	-7.0748
4-methylaniline	carbon tetrachloride	106-49-0	56-23-5	-7.24	Test	-7.04503	-5.98337
4-methylaniline	chlorobenzene	106-49-0	108-90-7	-7.54	Train	-7.47181	-7.20508
4-methylaniline	chloroform	106-49-0	67-66-3	-8.01	Test	-7.52973	-7.29672
4-methylaniline	cyclohexane	106-49-0	110-82-7	-6.3	Train	-6.91873	-5.46132
4-methylaniline	decane	106-49-0	124-18-5	-6.05	Test	-6.62462	-6.70381
4-methylaniline	ethylacetate	106-49-0	141-78-6	-7.63	Test	-7.81984	-7.79511
4-methylaniline	heptane	106-49-0	142-82-5	-6.15	Test	-6.60997	-6.35188
4-methylaniline	hexadecane	106-49-0	544-76-3	-6.04	Train	-6.38916	-6.51223
4-methylaniline	hexane	106-49-0	110-54-3	-6.18	Train	-6.67153	-6.71433
4-methylaniline	octane	106-49-0	111-65-9	-6	Train	-6.52767	-6.90049
4-methylaniline	octanol	106-49-0	111-87-5	-7.44	Train	-7.72971	-6.19885
4-methylaniline	toluene	106-49-0	108-88-3	-7.39	Train	-7.13965	-6.70217
4-methylaniline	xylene (mixed isomers)	106-49-0	1330-20-7	-7.17	Test	-7.04838	-7.01891
p-cresol	p-cresol	106-44-5	106-44-5	-8.37477	Train	-8.25074	-8.26068
4-methylpyridine	4-methylpyridine	108-89-4	108-89-4	-6.17113	Train	-6.15645	-6.0579
4-methylpyridine	benzene	108-89-4	71-43-2	-6.17	Train	-5.14356	-5.73241
4-methylpyridine	cyclohexane	108-89-4	110-82-7	-5.23	Train	-4.8305	-5.05666
4-methylpyridine	hexadecane	108-89-4	544-76-3	-4.89	Train	-4.30093	-4.48928
4-methylpyridine	octanol	108-89-4	111-87-5	-6.6	Train	-5.64148	-6.0269
5-nonanone	hexadecane	502-56-7	544-76-3	-6.46	Train	-6.68357	-6.18761
acetaldehyde	chloroform	75-07-0	67-66-3	-3.65	Train	-3.3764	-3.46152
acetaldehyde	diethylether	75-07-0	60-29-7	-2.85	Train	-3.33442	-3.48761
acetaldehyde	hexadecane	75-07-0	544-76-3	-1.68	Train	-2.23584	-2.19002
acetamide	hexadecane	60-35-5	544-76-3	-3.33	Train	-3.43782	-3.13515
acetic acid	acetic acid	64-19-7	64-19-7	-5.89389	Train	-5.44396	-5.30567
acetic acid	1,2-Dichlorethane	64-19-7	107-06-2	-4.89	Train	-4.98011	-4.77024
acetic acid	aceticacid	64-19-7	64-19-7	-5.3	Train	-5.38286	-5.56103
acetic acid	acetophenone	64-19-7	98-86-2	-6.2	Test	-5.29135	-6.02849
acetic acid	aniline	64-19-7	62-53-3	-6.3	Train	-5.37179	-5.98973
acetic acid	benzene	64-19-7	71-43-2	-4.02	Train	-4.45728	-3.32546
acetic acid	bromoform	64-19-7	75-25-2	-4.54	Train	-4.5445	-4.48311
acetic acid	butylacetate	64-19-7	123-86-4	-6.11	Test	-4.85361	-5.67768
acetic acid	carbon tetrachloride	64-19-7	56-23-5	-3.64	Train	-4.27053	-3.543
acetic acid	chloroform	64-19-7	67-66-3	-4.74	Train	-4.75522	-4.49655
acetic acid	cyclohexanone	64-19-7	108-94-1	-6.43	Train	-5.39019	-6.86469
acetic acid	decalin	64-19-7	91-17-8	-4.49	Train	-4.08812	-4.52719
acetic acid	dibutylether	64-19-7	142-96-1	-5.21	Test	-4.36145	-4.84661
acetic acid	diisopropylether	64-19-7	108-20-3	-5.73	Train	-4.54258	-4.75167
acetic acid	2-nitrotoluene	64-19-7	88-72-2	-4.68	Test	-5.21077	-4.01746
acetic acid	toluene	64-19-7	108-88-3	-4	Train	-4.36514	-4.54715
acetic acid	xylene (mixed isomers)	64-19-7	1330-20-7	-4.08	Train	-4.27387	-4.30468
acetic anhydride	acetic anhydride	108-24-7	108-24-7	-6.25479	Train	-6.66035	-5.95164
acetone	acetone	67-64-1	67-64-1	-4.19695	Train	-4.74511	-4.37357
acetone	benzene	67-64-1	71-43-2	-3.79	Train	-3.59686	-3.64195
acetone	carbondisulfide	67-64-1	75-15-0	-3.14	Train	-3.81464	-3.49275
acetone	carbon tetrachloride	67-64-1	56-23-5	-3.35	Train	-3.4101	-3.44381
acetone	chlorobenzene	67-64-1	108-90-7	-3.86	Train	-3.83688	-3.55831
acetone	chloroform	67-64-1	67-66-3	-4.42	Train	-3.8948	-4.03038
acetone	chlorohexane	67-64-1	544-10-5	-3.45	Train	-3.22758	-3.36419
acetone	cyclohexane	67-64-1	110-82-7	-2.67	Train	-3.2838	-2.59842
acetone	decane	67-64-1	124-18-5	-2.47	Train	-2.98969	-3.05704
Acetone	DMSO	67-64-1	67-68-5	-3.76	Train	-4.60607	-4.34813
acetone	ethylbenzene	67-64-1	100-41-4	-3.41	Train	-3.46936	-3.48222
acetone	heptane	67-64-1	142-82-5	-2.61	Test	-2.97505	-2.90752
acetone	hexadecane	67-64-1	544-76-3	-2.31	Train	-2.75423	-2.61518
acetone	hexane	67-64-1	110-54-3	-2.6	Test	-3.03661	-2.96456
acetone	isooctane	67-64-1	540-84-1	-2.44	Test	-2.66954	-2.94081
acetone	isopropylbenzene	67-64-1	98-82-8	-3.32	Train	-3.3103	-3.374
acetone	octane	67-64-1	111-65-9	-2.46	Train	-2.89274	-2.79614
acetone	perfluorobenzene	67-64-1	392-56-3	-3.82	Train	-3.47697	-3.19941
acetone	tetrachloroethene	67-64-1	127-18-4	-3.09	Train	-3.43456	-2.52873
acetone	tetralin	67-64-1	119-64-2	-2.54	Train	-3.48274	-3.64928
acetone	toluene	67-64-1	108-88-3	-3.59	Test	-3.50472	-3.56338
acetone	xylene (mixed isomers)	67-64-1	1330-20-7	-3.26	Test	-3.41345	-3.52166
acetonitrile	acetonitrile	75-05-8	75-05-8	-4.88528	Train	-3.65267	-3.63715
acetonitrile	cyclohexane	75-05-8	110-82-7	-1.87	Train	-1.89661	-2.3642
acetonitrile	diethylether	75-05-8	60-29-7	-3.59	Train	-2.46562	-3.09441
acetonitrile	heptane	75-05-8	142-82-5	-2.06	Train	-1.58785	-2.6085
acetonitrile	hexadecane	75-05-8	544-76-3	-2.37	Train	-1.36704	-1.79682
acetonitrile	octanol	75-05-8	111-87-5	-3.15	Train	-2.70758	-3.33444
acetophenone	1,2-Dichlorethane	98-86-2	107-06-2	-7.83	Test	-7.19339	-7.26256
acetophenone	acetophenone	98-86-2	98-86-2	-7.59	Test	-7.50463	-6.54926
acetophenone	carbon tetrachloride	98-86-2	56-23-5	-7.1	Train	-6.4838	-6.24033
acetophenone	chloroform	98-86-2	67-66-3	-7.81	Train	-6.9685	-7.05926
acetophenone	cyclohexane	98-86-2	110-82-7	-6.29	Test	-6.3575	-6.60742
acetophenone	decalin	98-86-2	91-17-8	-6.23	Train	-6.3014	-6.39603
acetophenone	diethylether	98-86-2	60-29-7	-6.79	Train	-6.92652	-7.33763
acetophenone	dodecane	98-86-2	112-40-3	-6.11	Test	-5.8601	-5.24285
acetophenone	heptane	98-86-2	142-82-5	-6.14	Train	-6.04875	-6.33237
acetophenone	hexadecane	98-86-2	544-76-3	-6.14	Train	-5.82793	-6.57358
acetophenone	hexane	98-86-2	110-54-3	-6.05	Train	-6.11031	-6.38941
acetophenone	octanol	98-86-2	111-87-5	-6.74	Train	-7.16848	-7.57766
acetylacetone	acetylacetone	123-54-6	123-54-6	-5.61664	Train	-5.7498	-5.46877
acetylsalicylic acid	octanol	50-78-2	111-87-17	-11.56	Train	-10.4432	-10.2193
allyl alcohol	allyl alcohol	107-18-6	107-18-6	-5.47802	Train	-5.81823	-5.8199
allyl alcohol	chloroform	107-18-6	67-66-3	-4.34	Train	-5.08599	-4.93643
allyl alcohol	diethylether	107-18-6	60-29-7	-4.87	Train	-5.04401	-5.19926
allyl alcohol	octanol	107-18-6	111-87-5	-5.27	Train	-5.28597	-6.45299
aniline	aniline	62-53-3	62-53-3	-7.47372	Test	-7.37536	-7.39325
aniline	1,2-Dichlorethane	62-53-3	107-06-2	-7.39	Train	-6.85571	-7.17742
aniline	4methyl2pentanone	62-53-3	108-10-1	-7.54	Train	-6.93969	-6.95084
aniline	aniline	62-53-3	62-53-3	-7.61	Train	-7.24739	-7.39325
aniline	benzene	62-53-3	71-43-2	-6.88	Test	-6.33288	-6.50641
aniline	bromobenzene	62-53-3	108-86-1	-6.66	Test	-6.55233	-6.44981
aniline	butylacetate	62-53-3	123-86-4	-7.3	Train	-6.72921	-6.83072
aniline	carbon tetrachloride	62-53-3	56-23-5	-6.1	Train	-6.14613	-6.23661
aniline	chlorobenzene	62-53-3	108-90-7	-6.72	Test	-6.57291	-6.42278
aniline	chloroform	62-53-3	67-66-3	-7.34	Test	-6.63082	-6.59338
aniline	cyclohexane	62-53-3	110-82-7	-5.52	Test	-6.01983	-6.04703
aniline	decalin	62-53-3	91-17-8	-5.78	Train	-5.96373	-5.46664
aniline	diethylether	62-53-3	60-29-7	-6.51	Train	-6.58885	-6.77724
aniline	diisopropylether	62-53-3	108-20-3	-6.67	Train	-6.41819	-6.6836
aniline	heptane	62-53-3	142-82-5	-5.38	Train	-5.71107	-5.77198
aniline	hexadecane	62-53-3	544-76-3	-5.44	Train	-5.49026	-5.47965
aniline	hexane	62-53-3	110-54-3	-5.43	Train	-5.77263	-5.82902
aniline	isooctane	62-53-3	540-84-1	-5.2	Test	-5.40556	-5.29573
aniline	nitrobenzene	62-53-3	98-95-3	-7.15	Test	-7.98963	-8.23662
aniline	octane	62-53-3	111-65-9	-4.84	Train	-5.62877	-4.30624
aniline	octanol	62-53-3	111-87-5	-6.71	Test	-6.83081	-5.47464
aniline	pentane	62-53-3	109-66-0	-5.15	Test	-5.85402	-4.76298
aniline	pentanol	62-53-3	71-41-0	-6.44	Train	-7.05319	-7.21541
aniline	toluene	62-53-3	108-88-3	-6.69	Test	-6.24074	-6.39512
aniline	tributylphosphate	62-53-3	126-73-8	-7.6	Train	-6.62933	-6.93056
aniline	xylene (mixed isomers)	62-53-3	1330-20-7	-6.1	Train	-6.14947	-5.9413
anisole	anisole	100-66-3	100-66-3	-6.33	Train	-5.80643	-6.73786
anisole	carbon tetrachloride	100-66-3	56-23-5	-5.49	Train	-5.3264	-5.56289
anisole	chloroform	100-66-3	67-66-3	-6.24	Test	-5.8111	-5.76903
anisole	cyclohexane	100-66-3	110-82-7	-5.38	Train	-5.2001	-5.30165
anisole	decalin	100-66-3	91-17-8	-5	Train	-5.144	-5.09026
anisole	diethylether	100-66-3	60-29-7	-5.71	Test	-5.76912	-6.03186
anisole	heptane	100-66-3	142-82-5	-5.35	Train	-4.89134	-5.26461
anisole	hexadecane	100-66-3	544-76-3	-5.35	Train	-4.67053	-5.96668
anisole	octanol	100-66-3	111-87-5	-5.47	Test	-6.01108	-5.28216
anthracene	heptane	120-12-7	142-82-5	-10	Train	-9.47971	-11.1631
anthracene	octanol	120-12-7	111-87-5	-10.47	Train	-10.5994	-12.4083
arylonitrile	arylonitrile	107-13-1	107-13-1	-4.65584	Test	-5.25107	-4.88863
benzaldehyde	benzaldehyde	100-52-7	100-52-7	-7.03873	Train	-6.7953	-6.68644
benzaldehyde	1,2-Dichlorethane	100-52-7	107-06-2	-7.23	Train	-6.36013	-6.99955
benzaldehyde	carbon tetrachloride	100-52-7	56-23-5	-6.11	Train	-5.65055	-6.09704
benzaldehyde	chloroform	100-52-7	67-66-3	-7.09	Test	-6.13524	-6.35237
benzaldehyde	cyclohexane	100-52-7	110-82-7	-5.71	Train	-5.52425	-5.97293
benzaldehyde	diethylether	100-52-7	60-29-7	-6.08	Train	-6.09326	-6.32976
benzaldehyde	heptane	100-52-7	142-82-5	-5.5	Train	-5.21549	-5.0153
benzaldehyde	hexadecane	100-52-7	544-76-3	-5.44	Train	-4.99467	-5.31761
benzaldehyde	hexane	100-52-7	110-54-3	-5.53	Train	-5.27705	-5.66698
benzaldehyde	octanol	100-52-7	111-87-5	-6.13	Train	-6.33522	-5.82194
benzamide	heptane	55-21-0	142-82-5	-7.26	Train	-6.85518	-7.04713
benzamide	hexane	55-21-0	110-54-3	-7.77	Test	-6.91674	-7.10417
benzene	benzene	71-43-2	71-43-2	-4.55545	Train	-3.91753	-4.51949
Benzene	acetonitrile	71-43-2	75-05-8	-4.25	Train	-4.62116	-3.95007
benzene	benzene	71-43-2	71-43-2	-4.55	Train	-3.91753	-3.82094
benzene	carbon tetrachloride	71-43-2	56-23-5	-4.5	Train	-3.73077	-5.89647
benzene	chloroform	71-43-2	67-66-3	-4.64	Train	-4.21546	-4.52749
benzene	cyclohexane	71-43-2	110-82-7	-4.19	Test	-3.60447	-4.45283
benzene	decane	71-43-2	124-18-5	-3.8	Train	-3.31036	-3.93458
benzene	diethylether	71-43-2	60-29-7	-4.21	Train	-4.17349	-3.90752
Benzene	DMSO	71-43-2	67-68-5	-3.96	Train	-4.92673	-5.22567
benzene	heptane	71-43-2	142-82-5	-4	Train	-3.29571	-5.12815
benzene	heptanol	71-43-2	111-70-6	-3.73	Test	-4.47959	-5.0687
benzene	hexadecane	71-43-2	544-76-3	-3.8	Train	-3.0749	-3.49272
benzene	hexane	71-43-2	110-54-3	-3.96	Train	-3.35727	-3.8421
benzene	hexanol	71-43-2	111-27-3	-3.68	Train	-4.53636	-5.15371
benzene	nonanol	71-43-2	143-08-8	-3.82	Train	-4.28515	-4.11132
benzene	octanol	71-43-2	111-87-5	-3.72	Train	-4.41545	-3.71031
benzene	pentanol	71-43-2	71-41-0	-3.53	Test	-4.63783	-5.22848
benzonitrile	benzonitrile	100-47-0	100-47-0	-7.28	Train	-6.86976	-6.89524
benzonitrile	carbon tetrachloride	100-47-0	56-23-5	-6.28	Train	-5.53435	-6.06046
benzonitrile	chloroform	100-47-0	67-66-3	-7.22	Train	-6.01904	-6.26659
benzonitrile	cyclohexane	100-47-0	110-82-7	-5.54	Train	-5.40805	-5.79921
benzonitrile	decalin	100-47-0	91-17-8	-5.86	Train	-5.35195	-5.43164
benzonitrile	diethylether	100-47-0	60-29-7	-6.36	Test	-5.97707	-6.10103
benzonitrile	heptane	100-47-0	142-82-5	-5.33	Test	-5.09929	-4.81052
benzonitrile	hexadecane	100-47-0	544-76-3	-5.51	Train	-4.87848	-5.26352
benzonitrile	octanol	100-47-0	111-87-5	-6.09	Train	-6.21903	-5.62903
benzoyl chloride	benzoyl chloride	98-88-4	98-88-4	-7.38051	Test	-8.13483	-7.676
benzylalcohol	benzylalcohol	100-51-6	100-51-6	-8.61	Test	-7.83583	-8.22137
benzylamine	benzylamine	100-46-9	100-46-9	-7.31836	Train	-7.43217	-7.69451
bis(methoxyethyl) ether	bis(methoxyethyl) ether	111-96-6	111-96-6	-6.25479	Train	-5.85683	-5.91004
bromobenzene	bromobenzene	108-86-1	108-86-1	-6.25	Train	-6.87108	-6.29244
butanal	hexadecane	123-72-8	544-76-3	-3.1	Train	-3.41932	-3.26835
butanal	isobutanol	123-72-8	78-83-1	-4.82	Test	-5.05613	-4.62619
butanal	isooctane	123-72-8	540-84-1	-3.45	Train	-3.33463	-3.08444
butanal	octanol	123-72-8	111-87-5	-4.62	Test	-4.75987	-4.80598
butanoic acid	1,2-Dichlorethane	107-92-6	107-06-2	-5.83	Train	-6.25445	-5.02914
butanoic acid	4methyl2pentanone	107-92-6	108-10-1	-7.44	Train	-6.33842	-7.42383
butanoic acid	benzene	107-92-6	71-43-2	-5.3	Train	-5.73162	-5.46039
butanoic acid	butanol	107-92-6	71-36-3	-7.66	Train	-6.57345	-6.58668
butanoic acid	butanone	107-92-6	78-93-3	-7.34	Train	-6.57406	-6.51441
butanoic acid	carbon tetrachloride	107-92-6	56-23-5	-4.81	Test	-5.54486	-5.28417
butanoic acid	chloroform	107-92-6	67-66-3	-5.99	Train	-6.02956	-5.76242
butanoic acid	diisopropylether	107-92-6	108-20-3	-6.85	Train	-5.81692	-7.20139
butanoic acid	ethylacetate	107-92-6	141-78-6	-7.34	Train	-6.31967	-6.26081
butanoic acid	heptane	107-92-6	142-82-5	-5.05	Train	-5.1098	-4.81865
butanoic acid	isobutanol	107-92-6	78-83-1	-7.62	Train	-6.5258	-6.58036
butanoic acid	isopropylbenzene	107-92-6	98-82-8	-4.93	Train	-5.44505	-4.79001
butanoic acid	2-nitrotoluene	107-92-6	88-72-2	-5.76	Test	-6.48511	-5.4803
butanoic acid	2-butanol	107-92-6	78-92-2	-7.34	Train	-6.53804	-6.39082
butanoic acid	toluene	107-92-6	108-88-3	-5.24	Train	-5.63948	-5.1443
butanoic acid	xylene (mixed isomers)	107-92-6	1330-20-7	-5.3	Train	-5.54821	-5.75442
butanol	acetonitrile	71-36-3	75-05-8	-5.2	Train	-5.39605	-5.29835
butanonitrile	hexadecane	109-74-0	544-76-3	-3.48	Train	-2.67602	-2.95338
butanonitrile	octanol	109-74-0	111-87-5	-4.25	Train	-4.01656	-4.1254
butyl acetate	1,2-Dichlorethane	123-86-4	107-06-2	-5.93	Train	-6.07946	-5.6624
butyl acetate	benzene	123-86-4	71-43-2	-5.78	Train	-5.55663	-6.39707
butyl acetate	bromobenzene	123-86-4	108-86-1	-5.58	Train	-5.77608	-5.41004
butyl acetate	bromooctane	123-86-4	111-83-1	-5.11	Train	-5.02951	-4.95129
butyl acetate	butylacetate	123-86-4	123-86-4	-5.52	Train	-5.95296	-5.13664
butyl acetate	butylbenzene	123-86-4	104-51-8	-5.28	Train	-5.20111	-4.79316
butyl acetate	carbon tetrachloride	123-86-4	56-23-5	-5.59	Train	-5.36988	-5.2685
butyl acetate	chlorobenzene	123-86-4	108-90-7	-5.74	Train	-5.79666	-5.61343
butyl acetate	chloroform	123-86-4	67-66-3	-6.71	Train	-5.85457	-7.26574
butyl acetate	chlorohexane	123-86-4	544-10-5	-5.37	Test	-5.18736	-5.00582
butyl acetate	cyclohexane	123-86-4	110-82-7	-4.94	Train	-5.24358	-5.00726
butyl acetate	decalin	123-86-4	91-17-8	-4.71	Test	-5.18748	-4.79587
butyl acetate	decane	123-86-4	124-18-5	-4.66	Test	-4.94947	-4.80277
butyl acetate	ethylbenzene	123-86-4	100-41-4	-5.48	Train	-5.42914	-4.14691
butyl acetate	fluorooctane	123-86-4	463-11-6	-5.22	Train	-5.12595	-5.42681
butyl acetate	heptane	123-86-4	142-82-5	-4.83	Train	-4.93482	-5.665
butyl acetate	hexadecane	123-86-4	544-76-3	-4.61	Test	-4.71401	-5.34531
butyl acetate	hexane	123-86-4	110-54-3	-4.86	Test	-4.99638	-5.18285
butyl acetate	isopropylbenzene	123-86-4	98-82-8	-5.36	Train	-5.27007	-5.1987
butyl acetate	nonane	123-86-4	111-84-2	-4.69	Test	-4.8057	-4.29607
butyl acetate	octane	123-86-4	111-65-9	-4.8	Train	-4.85252	-4.62084
butyl acetate	octanol	123-86-4	111-87-5	-4.96	Train	-6.05456	-4.7492
butyl acetate	pentadecane	123-86-4	629-62-9	-4.49	Test	-4.75902	-3.96671
butyl acetate	pentane	123-86-4	109-66-0	-4.88	Train	-5.07777	-5.69089
butyl acetate	perfluorobenzene	123-86-4	392-56-3	-5.52	Train	-5.43675	-5.41249
butyl acetate	secbutylbenzene	123-86-4	135-98-8	-5.22	Train	-5.21002	-5.11215
butyl acetate	tbutylbenzene	123-86-4	98-06-6	-5.25	Train	-5.1955	-5.32321
butyl acetate	tetrachloroethene	123-86-4	127-18-4	-5.35	Train	-5.39434	-5.31365
butyl acetate	toluene	123-86-4	108-88-3	-5.57	Train	-5.46449	-6.31233
butyl acetate	xylene (mixed isomers)	123-86-4	1330-20-7	-5.4	Train	-5.37322	-5.19683
butylamine	1,2-Dichlorethane	109-73-9	107-06-2	-4.34	Train	-4.90562	-4.57684
butylamine	anisole	109-73-9	100-66-3	-4.44	Train	-4.67607	-4.49514
butylamine	benzylalcohol	109-73-9	100-51-6	-5.15	Train	-5.23919	-5.34212
butylamine	bromobenzene	109-73-9	108-86-1	-4.22	Train	-4.60224	-4.32448
butylamine	carbon tetrachloride	109-73-9	56-23-5	-5.35	Test	-4.19604	-4.67904
butylamine	decalin	109-73-9	91-17-8	-3.72	Test	-4.01364	-5.03035
butylamine	decane	109-73-9	124-18-5	-3.55	Train	-3.77563	-3.7584
butylamine	decanol	109-73-9	112-30-1	-5.22	Train	-4.65714	-5.3666
butylamine	diethylether	109-73-9	60-29-7	-4.24	Train	-4.63876	-4.90216
butylamine	ethylbenzene	109-73-9	100-41-4	-4.43	Test	-4.2553	-3.94077
butylamine	heptane	109-73-9	142-82-5	-3.55	Train	-3.76098	-3.79618
butylamine	heptanol	109-73-9	111-70-6	-5.4	Train	-4.94486	-4.9303
butylamine	hexane	109-73-9	110-54-3	-3.62	Train	-3.82254	-4.00448
butylamine	hexanol	109-73-9	111-27-3	-5.5	Test	-5.00163	-5.98677
butylamine	iodobenzene	109-73-9	591-50-4	-4.19	Train	-4.51824	-4.06011
butylamine	isooctane	109-73-9	540-84-1	-3.57	Train	-3.45547	-3.2931
butylamine	isopropylbenzene	109-73-9	98-82-8	-4.06	Train	-4.09623	-4.28959
butylamine	isopropyltoluene	109-73-9	99-87-6	-4.22	Train	-3.76413	-3.83944
butylamine	nonane	109-73-9	111-84-2	-3.55	Train	-3.63186	-3.47737
butylamine	nonanol	109-73-9	143-08-8	-5.35	Train	-4.75042	-4.73427
butylamine	octane	109-73-9	111-65-9	-3.44	Train	-3.67868	-3.53528
butylamine	octanol	109-73-9	111-87-5	-5.33	Test	-4.88072	-6.10836
butylamine	1,2-dichlorobenzene	109-73-9	95-50-1	-4.13	Train	-4.73669	-4.00941
butylamine	pentanol	109-73-9	71-41-0	-5.55	Train	-5.1031	-5.48998
butylamine	perfluorobenzene	109-73-9	392-56-3	-4.13	Train	-4.26291	-4.21554
butylamine	2-butanol	109-73-9	78-92-2	-5.52	Train	-5.18922	-5.79095
butylamine	tetrachloroethene	109-73-9	127-18-4	-4.49	Test	-4.2205	-4.25462
butylamine	tetrahydrothiophenedioxide	109-73-9	126-33-0	-4.25	Train	-4.85892	-3.35159
butylamine	toluene	109-73-9	108-88-3	-4.33	Test	-4.29065	-4.26978
butylamine	undecane	109-73-9	1120-21-4	-3.55	Train	-3.50113	-3.26251
butylbenzene	butylbenzene	104-51-8	104-51-8	-6.86	Train	-6.43625	-6.84806
butanal	butanal	123-72-8	123-72-8	-4.42161	Test	-5.19893	-4.70996
butyronitrile	butyronitrile	109-74-0	109-74-0	-5.40393	Train	-4.79359	-4.63443
carbon disulfide	carbon disulfide	75-15-0	75-15-0	-3.95	Train	-3.35991	-3.26305
carbon tetrachloride	carbon tetrachloride	56-23-5	56-23-5	-4.35	Train	-3.93434	-3.8978
c-hexanol	c-hexanol	108-93-0	108-93-0	-7.39724	Train	-6.50194	-6.77604
chlorobenzene	carbon tetrachloride	108-90-7	56-23-5	-5.21	Train	-4.99379	-5.30068
chlorobenzene	chlorobenzene	108-90-7	108-90-7	-5.66	Train	-5.42057	-6.80711
chlorobenzene	chloroform	108-90-7	67-66-3	-5.45	Train	-5.47848	-6.22578
chlorobenzene	cyclohexane	108-90-7	110-82-7	-5.1	Train	-4.86749	-5.03943
chlorobenzene	decalin	108-90-7	91-17-8	-4.61	Test	-4.81139	-4.43988
chlorobenzene	decane	108-90-7	124-18-5	-4.93	Train	-4.57338	-4.42358
chlorobenzene	decanol	108-90-7	112-30-1	-4.83	Train	-5.45489	-4.6814
chlorobenzene	diethylether	108-90-7	60-29-7	-5.42	Train	-5.43651	-5.76964
chlorobenzene	heptane	108-90-7	142-82-5	-5.15	Train	-4.55873	-4.76439
chlorobenzene	hexadecane	108-90-7	544-76-3	-4.99	Train	-4.33792	-5.09736
chlorobenzene	hexane	108-90-7	110-54-3	-5.14	Train	-4.62029	-5.03326
chlorobenzene	octanol	108-90-7	111-87-5	-5	Test	-5.67847	-4.73532
chlorobenzene	undecane	108-90-7	1120-21-4	-5.12	Train	-4.29888	-4.38025
chloroethane	hexadecane	75-00-3	544-76-3	-2.29	Train	-2.23542	-2.33641
chloroethane	octanol	75-00-3	111-87-5	-2.58	Train	-3.57597	-3.02445
chloroform	hexadecyliodide	67-66-3	544-77-4	-3.36	Train	-3.8816	-2.92446
cinnamaldehyde	cinnamaldehyde	104-55-2	104-55-2	-9.12047	Train	-9.54716	-9.61662
cyclopentanone	c-pentanone	120-92-3	120-92-3	-6.65632	Train	-5.84028	-5.49959
isopropylbenzene	isopropylbenzene	98-82-8	98-82-8	-6.08748	Train	-5.81717	-6.31855
cyclohexane	octanol	110-82-7	111-87-5	-3.46	Train	-3.50625	-3.96724
cyclohexanone	cyclohexanone	108-94-1	108-94-1	-6.25	Train	-6.1171	-5.97288
cyclopentane	octanol	287-92-3	111-87-5	-2.65	Train	-2.95345	-2.44275
cyclopentanol	hexadecane	96-41-3	544-76-3	-4.42	Train	-4.19856	-4.47089
cyclopentanone	carbon tetrachloride	120-92-3	56-23-5	-5.26	Train	-4.45573	-5.5618
cyclopentanone	hexadecane	120-92-3	544-76-3	-4.39	Train	-3.79986	-3.6969
cyclopentanone	octanol	120-92-3	111-87-5	-5.01	Train	-5.14041	-5.50927
cyclopropane	octanol	75-19-4	111-87-5	-1.6	Train	-1.70266	-2.38917
di(2-chloroethyl)ether	di(2-chloroethyl)ether	111-44-4	111-44-4	-6.83079	Train	-6.89842	-5.94655
dibenzyl ether	dibenzyl ether	103-50-4	103-50-4	-9.05355	Train	-9.51162	-10.2122
dibutylether	dibutylether	142-96-1	142-96-1	-5.76	Train	-5.45289	-6.07315
dichloroacetic acid	dichloroacetic acid	79-43-6	79-43-6	-8.06884	Train	-7.48888	-7.23915
dichloroethane	1,2-Dichlorethane	107-06-2	107-06-2	-4.69	Train	-4.72571	-4.56293
dichloromethane	DMSO	75-09-2	67-68-5	-4.1	Train	-4.97674	-4.10349
dichloromethane	hexadecane	75-09-2	544-76-3	-2.76	Train	-3.12491	-3.58559
dichloromethane	hexadecyliodide	75-09-2	544-77-4	-2.76	Train	-2.41666	-3.32469
dichloromethane	dichloromethane	75-09-2	75-09-2	-3.8	Train	-4.62178	-4.30459
diethyl carbonate	diethyl carbonate	105-58-8	105-58-8	-5.66205	Train	-4.77601	-4.98259
diethyl disulfide	hexadecane	110-81-6	544-76-3	-5.74	Test	-5.8566	-5.383
diethyl ether	chloroform	60-29-7	67-66-3	-4.32	Train	-3.22684	-3.04877
diethyl ether	cyclohexane	60-29-7	110-82-7	-3.03	Train	-2.61585	-2.58139
diethyl ether	diethyl ether	60-29-7	60-29-7	-3.39	Train	-3.18487	-3.31159
diethyl ether	hexadecane	60-29-7	544-76-3	-2.81	Train	-2.08628	-2.93996
diethyl ether	octanol	60-29-7	111-87-5	-2.89	Train	-3.42683	-3.55163
diethyl malonate	diethyl malonate	105-53-3	105-53-3	-7.71511	Train	-8.10404	-7.86783
diethyl sulfide	diethyl sulfide	352-93-2	352-93-2	-4.72993	Train	-5.241	-4.80386
diethyl sulfide	hexadecane	352-93-2	544-76-3	-4.23	Test	-3.97345	-4.87371
diethyl sulfite	diethyl sulfite	623-81-4	623-81-4	-6.35039	Train	-6.89492	-5.56442
diethylamine	diethylamine	109-89-7	109-89-7	-3.92687	Train	-4.80578	-4.84239
diethylamine	1,2-Dichlorethane	109-89-7	107-06-2	-4	Test	-4.929	-3.78506
diethylamine	benzene	109-89-7	71-43-2	-4.02	Train	-4.40617	-3.17279
diethylamine	butanol	109-89-7	71-36-3	-5.15	Train	-5.248	-5.18365
diethylamine	carbon tetrachloride	109-89-7	56-23-5	-4.12	Train	-4.21942	-5.05389
diethylamine	chloroform	109-89-7	67-66-3	-5.23	Train	-4.70411	-4.35939
diethylamine	cyclohexane	109-89-7	110-82-7	-3.61	Train	-4.09312	-3.29528
diethylamine	dibutylether	109-89-7	142-96-1	-3.8	Train	-4.31034	-4.2181
diethylamine	diethylether	109-89-7	60-29-7	-3.83	Train	-4.66214	-4.62222
diethylamine	diisopropylether	109-89-7	108-20-3	-3.78	Train	-4.49148	-2.92669
diethylamine	hexadecane	109-89-7	544-76-3	-3.27	Train	-3.56355	-3.32463
diethylamine	isobutanol	109-89-7	78-83-1	-4.86	Train	-5.20035	-4.50636
diethylamine	octane	109-89-7	111-65-9	-3.42	Test	-3.70206	-3.30845
diethylamine	octanol	109-89-7	111-87-5	-4.75	Train	-4.9041	-5.14166
diethylamine	pentanol	109-89-7	71-41-0	-5.3	Train	-5.12648	-5.48461
diethylamine	toluene	109-89-7	108-88-3	-3.75	Train	-4.31403	-4.24009
diethylamine	xylene (mixed isomers)	109-89-7	1330-20-7	-3.93	Train	-4.22276	-3.34768
difluorodichloromethane	chloroform	75-71-8	67-66-3	-1.55	Train	-2.72315	-2.56731
difluorodichloromethane	cyclohexane	75-71-8	110-82-7	-1.81	Test	-2.11216	-2.09993
diiodomethane	diiodomethane	75-11-6	75-11-6	-7.20842	Train	-7.05746	-7.1706
di-i-propyl sulfide	di-i-propyl sulfide	625-80-9	625-80-9	-5.21511	Train	-6.26754	-5.86255
dimethyl 2,4,5-trichlorophenyl thiophosphate	octanol	299-84-3	111-87-5	-11.69	Test	-12.617	-12.0325
dimethyl disulfide	hexadecane	624-92-0	544-76-3	-4.84	Train	-4.52215	-4.57495
dimethyl ether	hexadecane	115-10-6	544-76-3	-1.49	Train	-0.771014	-2.34706
dimethyl ether	octanol	115-10-6	111-87-5	-2.06	Train	-2.11156	-2.08915
dimethyl phthalate	dimethyl phthalate	131-11-3	131-11-3	-10.3872	Train	-10.7549	-9.79834
dimethyl sulfide	dimethyl sulfide	75-18-3	75-18-3	-3.70459	Train	-4.15266	-3.6777
dimethyl sulfide	hexadecane	75-18-3	544-76-3	-3.05	Train	-2.59741	-2.37329
dimethylamine	benzene	124-40-3	71-43-2	-3.01	Train	-3.17352	-4.51534
dimethylamine	carbon tetrachloride	124-40-3	56-23-5	-2.75	Train	-2.98677	-3.11063
dimethylamine	chlorobenzene	124-40-3	108-90-7	-2.75	Train	-3.41355	-2.99613
dimethylamine	chloroform	124-40-3	67-66-3	-3.69	Train	-3.47146	-3.53595
dimethylamine	diethylether	124-40-3	60-29-7	-2.63	Train	-3.42949	-3.3424
dimethylamine	hexadecane	124-40-3	544-76-3	-2.18	Train	-2.3309	-2.94594
dimethylamine	isobutanol	124-40-3	78-83-1	-4.43	Train	-3.9677	-4.39184
dimethylamine	toluene	124-40-3	108-88-3	-2.68	Train	-3.08138	-3.08297
dimethylamine	xylene (mixed isomers)	124-40-3	1330-20-7	-3.36	Train	-2.99011	-3.4872
dimethylcyanamide	dimethylcyanamide	1467-79-4	1467-79-4	-6.64915	Train	-5.23014	-4.41103
Dimethylether	methanol	115-10-6	67-56-1	-2.31	Train	-3.0114	-2.86919
dimethylformamide	dimethylformamide	68-12-2	68-12-2	-6.52247	Train	-5.44532	-5.00702
di-n-butyl sulfide	di-n-butyl sulfide	544-40-1	544-40-1	-7.11282	Train	-7.62293	-7.06352
di-n-butylamine	di-n-butylamine	111-92-2	111-92-2	-6.38385	Train	-7.16179	-6.9685
di-n-propyl ether	di-n-propyl ether	111-43-3	111-43-3	-4.52677	Train	-4.32844	-4.31075
dipropyl sulfide	hexadecane	111-47-7	544-76-3	-5.61	Train	-5.29363	-4.81623
dipropylamine	benzene	142-84-7	71-43-2	-5.09	Test	-5.73345	-4.86807
dipropylamine	diethylether	142-84-7	60-29-7	-4.96	Train	-5.98942	-5.9775
dipropylamine	hexadecane	142-84-7	544-76-3	-4.57	Train	-4.89083	-5.03036
dipropylamine	isobutanol	142-84-7	78-83-1	-5.87	Train	-6.52763	-6.4094
dipropylamine	octanol	142-84-7	111-87-5	-6.02	Train	-6.23138	-6.09432
dipropylamine	toluene	142-84-7	108-88-3	-5.24	Train	-5.64131	-5.19732
dipropylamine	xylene (mixed isomers)	142-84-7	1330-20-7	-5.35	Train	-5.55004	-5.03592
ethane	octanol	74-84-0	111-87-5	-0.64	Train	-0.956624	-1.94125
ethanethiol	hexadecane	75-08-1	544-76-3	-2.96	Train	-2.60362	-3.17661
ethanethiol	isooctane	75-08-1	540-84-1	-3.13	Train	-2.51893	-3.15856
ethanol	2methylpyridine	64-17-5	109-06-8	-5.01	Train	-4.06013	-4.49198
ethanol	aceticacid	64-17-5	64-19-7	-5.25	Train	-4.29167	-5.15545
ethanol	acetonitrile	64-17-5	75-05-8	-4.43	Train	-4.51984	-4.33569
ethanol	acetophenone	64-17-5	98-86-2	-4.12	Train	-4.20015	-4.15325
ethanol	aniline	64-17-5	62-53-3	-4.45	Train	-4.2806	-4.46509
ethanol	anisole	64-17-5	100-66-3	-3.59	Train	-3.65936	-3.53065
ethanol	benzene	64-17-5	71-43-2	-3.42	Train	-3.36609	-3.64729
ethanol	benzonitrile	64-17-5	100-47-0	-4.05	Train	-4.47468	-4.2149
ethanol	benzylalcohol	64-17-5	100-51-6	-4.84	Train	-4.22248	-5.66061
ethanol	bromobenzene	64-17-5	108-86-1	-3.26	Train	-3.58553	-3.37214
ethanol	bromoform	64-17-5	75-25-2	-3.24	Train	-3.45331	-3.16622
ethanol	butanol	64-17-5	71-36-3	-5.02	Test	-4.20792	-4.68136
ethanol	butanone	64-17-5	78-93-3	-4.46	Train	-4.20853	-4.22163
ethanol	butylacetate	64-17-5	123-86-4	-3.97	Test	-3.76242	-4.07513
ethanol	carbondisulfide	64-17-5	75-15-0	-2.72	Test	-3.58387	-3.43793
ethanol	carbon tetrachloride	64-17-5	56-23-5	-2.96	Train	-3.17933	-2.85781
ethanol	chlorobenzene	64-17-5	108-90-7	-3.3	Test	-3.60611	-4.04167
ethanol	chloroform	64-17-5	67-66-3	-3.94	Train	-3.66403	-3.53829
ethanol	cyclohexane	64-17-5	110-82-7	-2.42	Train	-3.05303	-3.11888
ethanol	cyclohexanone	64-17-5	108-94-1	-4.41	Train	-4.299	-4.11653
ethanol	decane	64-17-5	124-18-5	-2.44	Train	-2.75892	-2.36758
ethanol	dibutylether	64-17-5	142-96-1	-3.51	Train	-3.27025	-3.70456
ethanol	diethylether	64-17-5	60-29-7	-4.41	Train	-3.62205	-4.26432
ethanol	diisopropylether	64-17-5	108-20-3	-3.9	Train	-3.45139	-3.75545
ethanol	dimethylacetamide	64-17-5	127-19-5	-5.4	Test	-4.73802	-5.04237
ethanol	dimethylformamide	64-17-5	68-12-2	-5.23	Train	-4.82996	-4.92649
ethanol	dimethylpyridine	64-17-5	108-48-5	-4.87	Test	-3.8088	-5.10846
ethanol	Diphenylether	64-17-5	101-84-8	-3.22	Test	-3.41034	-3.59707
ethanol	DMSO	64-17-5	67-68-5	-5.25	Train	-5.09172	-5.25522
ethanol	dodecane	64-17-5	112-40-3	-2.06	Train	-2.55563	-2.34166
ethanol	ethanol	64-17-5	64-17-5	-5.04	Train	-4.4953	-5.83052
ethanol	ethoxybenzene	64-17-5	103-73-1	-3.45	Train	-3.3336	-3.20363
ethanol	ethylacetate	64-17-5	141-78-6	-4.24	Train	-3.95414	-4.08466
ethanol	ethylbenzene	64-17-5	100-41-4	-2.49	Train	-3.23859	-3.41853
ethanol	fluorobenzene	64-17-5	462-06-6	-3.45	Train	-3.64784	-3.54719
ethanol	heptane	64-17-5	142-82-5	-2.15	Train	-2.74428	-2.84383
ethanol	hexadecane	64-17-5	544-76-3	-2.03	Train	-2.52346	-2.5515
ethanol	hexane	64-17-5	110-54-3	-2.73	Train	-2.80583	-3.10819
ethanol	iodobenzene	64-17-5	591-50-4	-3.18	Train	-3.50154	-3.49975
ethanol	isooctane	64-17-5	540-84-1	-2.44	Test	-2.43877	-2.99336
ethanol	isopropanol	64-17-5	67-63-0	-4.84	Train	-4.29529	-4.7946
ethanol	isopropylbenzene	64-17-5	98-82-8	-2.9	Train	-3.07953	-3.50462
Ethanol	methanol	64-17-5	67-56-1	-4.41	Test	-4.76385	-4.61665
ethanol	methoxyethanol	64-17-5	109-86-4	-4.71	Test	-4.72314	-4.92836
ethanol	dichloromethane	64-17-5	75-09-2	-3.82	Train	-4.02033	-4.08686
ethanol	methylformamide	64-17-5	123-39-7	-5.12	Train	-4.50201	-4.96038
ethanol	nitroethane	64-17-5	79-24-3	-3.98	Train	-4.63835	-3.73205
ethanol	nitromethane	64-17-5	75-52-5	-4.16	Train	-4.8449	-4.50848
ethanol	nonane	64-17-5	111-84-2	-2.15	Train	-2.61515	-2.67455
ethanol	octane	64-17-5	111-65-9	-2.15	Train	-2.66197	-2.73246
ethanol	octanol	64-17-5	111-87-5	-4.36	Test	-3.86401	-4.08912
ethanol	pentane	64-17-5	109-66-0	-2.15	Train	-2.88722	-2.9753
ethanol	propanol	64-17-5	71-23-8	-5.01	Train	-4.34041	-5.23452
ethanol	pyridine	64-17-5	110-86-1	-5.08	Test	-4.27953	-4.21012
ethanol	tetrahydrofuran	64-17-5	109-99-9	-4.56	Train	-4.07023	-4.09304
ethanol	tetrahydrothiophenedioxide	64-17-5	126-33-0	-4.3	Train	-3.84222	-4.81768
ethanol	toluene	64-17-5	108-88-3	-3.33	Train	-3.27395	-3.46697
ethanol	tributylphosphate	64-17-5	126-73-8	-4.57	Test	-3.66254	-5.18267
ethanol	triethylamine	64-17-5	121-44-8	-4.02	Train	-3.41725	-4.26171
ethanol	xylene (mixed isomers)	64-17-5	1330-20-7	-3.42	Train	-3.18268	-3.069
ethene	hexadecane	74-85-1	544-76-3	-0.39	Train	-0.935666	-1.27707
ethyl acetate	ethyl acetate	141-78-6	141-78-6	-4.50287	Train	-4.95333	-4.73422
ethyl acetate	1,2-Dichlorethane	141-78-6	107-06-2	-4.93	Train	-4.74287	-5.48648
ethyl acetate	benzene	141-78-6	71-43-2	-4.53	Test	-4.22004	-5.14305
ethyl acetate	bromobenzene	141-78-6	108-86-1	-4.57	Train	-4.43948	-4.5567
ethyl acetate	bromooctane	141-78-6	111-83-1	-3.97	Train	-3.69291	-3.90257
ethyl acetate	carbondisulfide	141-78-6	75-15-0	-4.08	Test	-4.43782	-4.24099
ethyl acetate	carbon tetrachloride	141-78-6	56-23-5	-4.4	Test	-4.03329	-4.02969
ethyl acetate	chlorobenzene	141-78-6	108-90-7	-4.63	Test	-4.46007	-4.14419
ethyl acetate	chloroform	141-78-6	67-66-3	-5.58	Test	-4.51798	-4.23582
ethyl acetate	chlorohexane	141-78-6	544-10-5	-4.25	Train	-3.85076	-4.75184
ethyl acetate	cyclohexane	141-78-6	110-82-7	-3.56	Train	-3.90699	-3.76844
ethyl acetate	decalin	141-78-6	91-17-8	-3.47	Test	-3.85088	-3.55706
ethyl acetate	decane	141-78-6	124-18-5	-3.43	Train	-3.61288	-3.64292
ethyl acetate	ethylacetate	141-78-6	141-78-6	-4.46	Test	-4.80809	-4.21466
ethyl acetate	ethylbenzene	141-78-6	100-41-4	-4.31	Train	-4.09254	-4.67387
ethyl acetate	fluorooctane	141-78-6	463-11-6	-4.16	Train	-3.78935	-3.87333
ethyl acetate	heptane	141-78-6	142-82-5	-3.5	Train	-3.59823	-3.2352
ethyl acetate	hexadecane	141-78-6	544-76-3	-3.25	Test	-3.37741	-3.20106
ethyl acetate	hexane	141-78-6	110-54-3	-3.62	Train	-3.65979	-3.70369
ethyl acetate	isobutanol	141-78-6	78-83-1	-4.27	Train	-5.01422	-4.11033
ethyl acetate	isopropylbenzene	141-78-6	98-82-8	-4.22	Train	-3.93348	-3.95988
ethyl acetate	nonane	141-78-6	111-84-2	-3.45	Train	-3.4691	-3.32411
ethyl acetate	octane	141-78-6	111-65-9	-3.48	Test	-3.51593	-3.54424
ethyl acetate	octanol	141-78-6	111-87-5	-4.06	Train	-4.71796	-4.11314
ethyl acetate	pentadecane	141-78-6	629-62-9	-3.37	Train	-3.42243	-3.28837
ethyl acetate	pentane	141-78-6	109-66-0	-3.69	Train	-3.74117	-3.20226
ethyl acetate	perfluorobenzene	141-78-6	392-56-3	-4.56	Train	-4.10015	-4.23751
ethyl acetate	secbutylbenzene	141-78-6	135-98-8	-4.11	Train	-3.87342	-3.71926
ethyl acetate	tbutylbenzene	141-78-6	98-06-6	-4.22	Train	-3.85891	-3.86245
ethyl acetate	tetrachloroethene	141-78-6	127-18-4	-4.22	Train	-4.05774	-4.10136
ethyl acetate	toluene	141-78-6	108-88-3	-4.41	Train	-4.1279	-3.53491
ethyl acetate	xylene (mixed isomers)	141-78-6	1330-20-7	-4.26	Test	-4.03663	-3.95802
ethyl benzoate	ethyl benzoate	93-89-0	93-89-0	-7.71511	Train	-7.76964	-7.50011
ethyl formate	ethyl formate	109-94-4	109-94-4	-4.03203	Test	-4.27111	-4.10614
ethyl formate	hexadecane	109-94-4	544-76-3	-2.59	Train	-2.51453	-3.00506
ethoxybenzene	chloroform	103-73-1	67-66-3	-7.16	Train	-6.40603	-6.33463
ethoxybenzene	cyclohexane	103-73-1	110-82-7	-6	Train	-5.79504	-6.44291
ethoxybenzene	ethoxybenzene	103-73-1	103-73-1	-6.75	Train	-6.07561	-5.952
ethoxybenzene	hexadecane	103-73-1	544-76-3	-5.64	Train	-5.26547	-5.29987
ethoxybenzene	octanol	103-73-1	111-87-5	-5.65	Train	-6.60602	-6.83749
ethyl propanoate	ethyl propanoate	105-37-3	105-37-3	-4.96176	Train	-5.4546	-5.19364
ethyl trichloroacetate	ethyl trichloroacetate	515-84-4	515-84-4	-6.81406	Train	-7.68909	-6.72963
ethylamine	1,2-Dichlorethane	75-04-7	107-06-2	-3.19	Train	-3.58576	-3.94813
ethylamine	benzene	75-04-7	71-43-2	-2.73	Train	-3.06293	-3.71111
ethylamine	bromobenzene	75-04-7	108-86-1	-2.73	Train	-3.28237	-3.08116
ethylamine	butanol	75-04-7	71-36-3	-4.5	Train	-3.90476	-3.99705
ethylamine	carbon tetrachloride	75-04-7	56-23-5	-2.77	Train	-2.87617	-2.96666
ethylamine	chlorobenzene	75-04-7	108-90-7	-2.73	Test	-3.30295	-3.16479
ethylamine	chloroform	75-04-7	67-66-3	-4.02	Test	-3.36087	-3.95369
ethylamine	cyclohexane	75-04-7	110-82-7	-2.04	Test	-2.74987	-2.31899
ethylamine	decane	75-04-7	124-18-5	-1.92	Train	-2.45576	-1.78705
ethylamine	decanol	75-04-7	112-30-1	-3.91	Train	-3.33728	-3.33098
ethylamine	diethylether	75-04-7	60-29-7	-2.89	Train	-3.31889	-3.43562
ethylamine	ethylbenzene	75-04-7	100-41-4	-2.59	Train	-2.93543	-3.13358
ethylamine	heptane	75-04-7	142-82-5	-2.09	Train	-2.44111	-2.43036
ethylamine	heptanol	75-04-7	111-70-6	-4.15	Test	-3.62499	-4.96721
ethylamine	hexadecane	75-04-7	544-76-3	-2.29	Train	-2.2203	-2.13803
ethylamine	hexane	75-04-7	110-54-3	-2.09	Train	-2.50267	-2.4874
ethylamine	hexanol	75-04-7	111-27-3	-4.2	Test	-3.68176	-4.58703
ethylamine	iodobenzene	75-04-7	591-50-4	-2.73	Train	-3.19838	-2.90087
ethylamine	nonane	75-04-7	111-84-2	-1.98	Train	-2.31199	-2.26108
ethylamine	nonanol	75-04-7	143-08-8	-4.02	Train	-3.43055	-3.85836
ethylamine	octane	75-04-7	111-65-9	-2.04	Train	-2.35881	-2.70541
ethylamine	octanol	75-04-7	111-87-5	-4.09	Train	-3.56085	-4.11218
ethylamine	1,2-dichlorobenzene	75-04-7	95-50-1	-2.59	Train	-3.41682	-2.49795
ethylamine	pentane	75-04-7	109-66-0	-2.18	Test	-2.58406	-2.56183
ethylamine	pentanol	75-04-7	71-41-0	-4.27	Train	-3.78323	-5.05376
ethylamine	toluene	75-04-7	108-88-3	-2.67	Train	-2.97079	-3.18257
ethylamine	tributylphosphate	75-04-7	126-73-8	-3.29	Test	-3.35938	-3.13532
ethylamine	xylene (mixed isomers)	75-04-7	1330-20-7	-3.01	Train	-2.87952	-3.43606
ethylbenzene	ethylbenzene	100-41-4	100-41-4	-5.73136	Test	-5.30671	-5.79522
ethylbenzene	acetonitrile	100-41-4	75-05-8	-5.36	Train	-6.17401	-6.22128
ethylbenzene	carbon tetrachloride	100-41-4	56-23-5	-5.67	Train	-5.28362	-5.37241
ethylbenzene	chloroform	100-41-4	67-66-3	-5.84	Test	-5.76832	-5.39666
ethylbenzene	cyclohexane	100-41-4	110-82-7	-4.97	Train	-5.15732	-5.44375
ethylbenzene	decane	100-41-4	124-18-5	-5.25	Train	-4.86321	-4.30945
ethylbenzene	diethylether	100-41-4	60-29-7	-5.45	Train	-5.72634	-5.04021
ethylbenzene	ethylbenzene	100-41-4	100-41-4	-5.67	Train	-5.34288	-6.16875
ethylbenzene	hexadecane	100-41-4	544-76-3	-5.15	Train	-4.62775	-4.92818
ethylbenzene	hexane	100-41-4	110-54-3	-4.99	Train	-4.91012	-5.49367
ethylbenzene	nonanol	100-41-4	143-08-8	-4.61	Test	-5.838	-4.82805
ethylbenzene	octanol	100-41-4	111-87-5	-5.08	Train	-5.9683	-6.46581
ethylbenzene	undecane	100-41-4	1120-21-4	-5.44	Train	-4.58871	-4.83638
ethyloctadecanoate	hexadecane	111-61-5	544-76-3	-13.69	Train	-13.7653	-12.9012
ethylparaben	octanol	120-47-8	111-87-22	-12.57	Train	-12.3674	-16.0383
ethyne	hexadecane	74-86-2	544-76-3	-0.2	Train	-0.700228	-1.16218
fluorobenzene	fluorobenzene	462-06-6	462-06-6	-4.63672	Train	-4.70534	-4.71277
fluorobenzene	carbon tetrachloride	462-06-6	56-23-5	-3.64	Test	-4.21737	-4.37635
fluorobenzene	chloroform	462-06-6	67-66-3	-4.25	Train	-4.70207	-6.33993
fluorobenzene	cyclohexane	462-06-6	110-82-7	-3.59	Train	-4.09108	-4.28446
fluorobenzene	decalin	462-06-6	91-17-8	-3.44	Train	-4.03497	-4.07308
fluorobenzene	decane	462-06-6	124-18-5	-3.48	Train	-3.79696	-4.15894
fluorobenzene	fluorobenzene	462-06-6	462-06-6	-4.6	Train	-4.68588	-4.63449
fluorobenzene	heptane	462-06-6	142-82-5	-4.13	Train	-3.78232	-4.34987
fluorobenzene	hexadecane	462-06-6	544-76-3	-4.03	Train	-3.5615	-3.71708
fluorobenzene	hexane	462-06-6	110-54-3	-4.15	Train	-3.84388	-3.71401
fluorobenzene	octanol	462-06-6	111-87-5	-3.87	Test	-4.90205	-3.81293
fluoroethane	hexadecane	353-36-6	544-76-3	-0.76	Train	-0.0657637	-0.495537
fluorotrichloromethane	chloroform	75-69-4	67-66-3	-2.62	Train	-3.64986	-3.38021
fluorotrichloromethane	cyclohexane	75-69-4	110-82-7	-2.63	Test	-3.03887	-2.75216
fluorotrichloromethane	octanol	75-69-4	111-87-5	-2.63	Train	-3.84984	-3.46509
formaldehyde	benzylalcohol	50-00-0	100-51-6	-3.48	Train	-2.9897	-3.39582
formaldehyde	butanol	50-00-0	71-36-3	-3.49	Train	-2.97514	-3.26704
formaldehyde	hexadecane	50-00-0	544-76-3	-0.99	Train	-1.29068	-1.40801
formaldehyde	hexanol	50-00-0	111-27-3	-3.42	Train	-2.75214	-3.57826
formaldehyde	octanol	50-00-0	111-87-5	-3.23	Train	-2.63123	-2.94564
formaldehyde	pentanol	50-00-0	71-41-0	-3.44	Train	-2.85361	-3.14377
formaldehyde	2-butanol	50-00-0	78-92-2	-2.86	Train	-2.93973	-3.1713
formamide	hexadecane	75-12-7	544-76-3	-2.91	Train	-2.82412	-2.6796
formic acid	formic acid	64-18-6	64-18-6	-5.53777	Train	-5.44856	-4.90785
furan	furan	110-00-9	110-00-9	-3.58509	Train	-3.65854	-3.59108
4-methylpyridine	acetonitrile	108-89-4	75-05-8	-5.75	Train	-5.84719	-5.78237
4-methylpyridine	methanol	108-89-4	67-56-1	-5.6	Train	-6.54132	-6.55443
g-butyrolactone	butanone	96-48-0	78-93-3	-4.47	Train	-4.84134	-4.7464
g-butyrolactone	ethanol	96-48-0	64-17-5	-4.58	Train	-5.12811	-4.13891
g-butyrolactone	nitromethane	96-48-0	75-52-5	-5.45	Train	-5.47771	-5.33426
g-butyrolactone	toluene	96-48-0	108-88-3	-4.7	Train	-3.90676	-3.9987
perfluorobenzene	perfluorobenzene	392-56-3	392-56-3	-4.42161	Test	-4.0656	-4.03038
hexamethyl phosphoramide	hexamethyl phosphoramide	680-31-9	680-31-9	-8.6807	Train	-8.86677	-8.10618
hexanoic acid	1,2-Dichlorethane	142-62-1	107-06-2	-7.33	Train	-7.58448	-7.1892
hexanoic acid	benzene	142-62-1	71-43-2	-6.94	Train	-7.06165	-6.99344
hexanoic acid	butanol	142-62-1	71-36-3	-8.75	Train	-7.90348	-7.8257
hexanoic acid	butanone	142-62-1	78-93-3	-8.07	Train	-7.90409	-7.62984
hexanoic acid	carbon tetrachloride	142-62-1	56-23-5	-6.99	Test	-6.87489	-6.7953
hexanoic acid	chloroform	142-62-1	67-66-3	-7.51	Test	-7.35959	-7.00144
hexanoic acid	diisopropylether	142-62-1	108-20-3	-8.23	Train	-7.14695	-7.17063
hexanoic acid	heptane	142-62-1	142-82-5	-6.54	Test	-6.43984	-6.25901
hexanoic acid	hexadecane	142-62-1	544-76-3	-5.35	Test	-6.21902	-4.97318
hexanoic acid	isobutanol	142-62-1	78-83-1	-8.77	Train	-7.85583	-7.81938
hexanoic acid	2-butanol	142-62-1	78-92-2	-8.11	Test	-7.86807	-7.8324
hexanoic acid	toluene	142-62-1	108-88-3	-6.97	Train	-6.96951	-6.88214
hexanoic acid	xylene (mixed isomers)	142-62-1	1330-20-7	-6.67	Train	-6.87824	-6.72363
hydrazine	hydrazine	302-01-2	302-01-2	-6.28586	Train	-5.40182	-4.15586
hydrazine	diethylether	302-01-2	60-29-7	-3.08	Train	-2.66246	-2.79432
hydrazine	octanol	302-01-2	111-87-5	-3.44	Train	-2.90442	-3.03436
hydrogen peroxide	hydrogen peroxide	7722-84-1	7722-84-1	-7.64341	Train	-7.07612	-4.86162
hydrogen peroxide	carbondisulfide	7722-84-1	75-15-0	-3.14	Train	-3.55004	-3.50162
hydrogen peroxide	carbon tetrachloride	7722-84-1	56-23-5	-3.14	Train	-3.1455	-3.46371
hydrogen peroxide	chloroform	7722-84-1	67-66-3	-4.7	Train	-3.63019	-3.61205
hydrogen peroxide	nitrobenzene	7722-84-1	98-95-3	-5.45	Train	-4.989	-5.08422
hydrogen peroxide	toluene	7722-84-1	108-88-3	-3.14	Train	-3.24011	-3.40591
hydrogen sulfide	hexadecane	7783-06-04	544-76-3	-0.72	Train	-0.711971	-0.873693
iodobenzene	iodobenzene	591-50-4	591-50-4	-7.13672	Train	-7.39154	-7.54997
i-pentanol	i-pentanol	123-51-3	123-51-3	-6.62525	Train	-6.14269	-5.88466
isobutanol	isobutanol	78-83-1	78-83-1	-5.79	Train	-5.51349	-5.6714
isopropanol	benzene	67-63-0	71-43-2	-3.48	Train	-4.00485	-4.17611
isopropanol	carbon tetrachloride	67-63-0	56-23-5	-3.15	Train	-3.8181	-3.97797
isopropanol	chloroform	67-63-0	67-66-3	-4.28	Train	-4.30279	-3.95569
isopropanol	diethylether	67-63-0	60-29-7	-4.44	Test	-4.26082	-4.44694
isopropanol	hexadecane	67-63-0	544-76-3	-2.47	Train	-3.16223	-3.14934
isopropanol	isopropanol	67-63-0	67-63-0	-4.82	Test	-4.93406	-5.1773
isopropanol	octanol	67-63-0	111-87-5	-4.62	Train	-4.50278	-4.33804
isopropyl ether	isopropyl ether	108-20-3	108-20-3	-4.02486	Train	-4.51661	-4.52941
isopropyl ether	chloroform	108-20-3	67-66-3	-3.78	Train	-4.63399	-3.06491
isopropyl ether	diisopropylether	108-20-3	108-20-3	-3.97	Train	-4.42136	-4.52941
isopropyl ether	hexadecane	108-20-3	544-76-3	-4.02	Train	-3.49343	-4.35139
isopropylbenzene	isopropylbenzene	98-82-8	98-82-8	-6.04	Train	-5.8076	-6.26195
m-cresol	1,2-Dichlorethane	108-39-4	107-06-2	-6.91	Test	-7.82862	-7.65626
m-cresol	4methyl2pentanone	108-39-4	108-10-1	-8.79	Test	-7.91259	-7.90493
m-Cresol	acetonitrile	108-39-4	75-05-8	-7.9	Train	-8.00942	-7.72684
m-cresol	benzene	108-39-4	71-43-2	-6.66	Test	-7.30579	-7.46051
m-cresol	bromobenzene	108-39-4	108-86-1	-7.26	Train	-7.46267	-7.36723
m-cresol	butylacetate	108-39-4	123-86-4	-8.44	Test	-7.70212	-7.78482
m-cresol	chloroform	108-39-4	67-66-3	-6.7	Train	-7.60373	-7.46851
m-cresol	decanol	108-39-4	112-30-1	-8.01	Train	-7.58014	-7.62669
m-cresol	diethylether	108-39-4	60-29-7	-7.95	Train	-7.56175	-7.73134
m-cresol	hexadecane	108-39-4	544-76-3	-5.91	Train	-6.46316	-6.43374
m-cresol	hexanol	108-39-4	111-27-3	-8.42	Train	-7.92462	-8.09473
m-cresol	mcresol	108-39-4	108-39-4	-8.4	Train	-7.99546	-8.11364
m-Cresol	methanol	108-39-4	67-56-1	-7.68	Train	-8.70355	-8.4989
m-cresol	octanol	108-39-4	111-87-5	-8.2	Train	-7.80371	-7.97137
m-cresol	xylene (mixed isomers)	108-39-4	1330-20-7	-6.32	Test	-7.12238	-6.4515
m-dichlorobenzene	m-dichlorobenzene	541-73-1	541-73-1	-6.68022	Train	-6.58238	-6.35293
methane	hexadecane	74-82-8	544-76-3	0.45	Train	1.40237	0.225585
methane	octanol	74-82-8	111-87-5	0.51	Train	0.0618179	-1.31204
methanol	methanol	67-56-1	67-56-1	-4.85899	Train	-4.20749	-4.06284
methanol	1,2-Dichlorethane	67-56-1	107-06-2	-2.53	Train	-3.27893	-3.22021
methanol	benzene	67-56-1	71-43-2	-2.58	Train	-2.7561	-3.15524
methanol	bromobenzene	67-56-1	108-86-1	-2.31	Train	-2.97554	-2.96785
methanol	bromoform	67-56-1	75-25-2	-2.79	Test	-2.84332	-3.0775
methanol	butanol	67-56-1	71-36-3	-4.73	Train	-3.59793	-3.85671
methanol	butylacetate	67-56-1	123-86-4	-3.04	Train	-3.15242	-3.34876
methanol	carbon tetrachloride	67-56-1	56-23-5	-2.25	Train	-2.56934	-2.82632
methanol	chlorobenzene	67-56-1	108-90-7	-2.44	Test	-2.99612	-2.43127
methanol	chloroform	67-56-1	67-66-3	-3.32	Train	-3.05404	-3.03245
methanol	decane	67-56-1	124-18-5	-1.29	Train	-2.14893	-2.43955
methanol	diethylether	67-56-1	60-29-7	-3.61	Train	-3.01206	-3.89201
methanol	ethylacetate	67-56-1	141-78-6	-3.37	Train	-3.34415	-3.53085
methanol	heptane	67-56-1	142-82-5	-1.29	Train	-2.13428	-2.12074
methanol	hexadecane	67-56-1	544-76-3	-1.32	Train	-1.91347	-1.99769
methanol	hexane	67-56-1	110-54-3	-1.49	Train	-2.19584	-0.804039
methanol	iodobenzene	67-56-1	591-50-4	-2.18	Train	-2.89155	-2.91316
methanol	nonane	67-56-1	111-84-2	-1.29	Test	-2.00516	-2.29002
methanol	octane	67-56-1	111-65-9	-1.29	Train	-2.05198	-1.92195
methanol	octanol	67-56-1	111-87-5	-3.87	Train	-3.25402	-3.53531
methanol	toluene	67-56-1	108-88-3	-2.18	Train	-2.66396	-2.1675
methanol	tributylphosphate	67-56-1	126-73-8	-4.16	Test	-3.05255	-4.23993
methanol	xylene (mixed isomers)	67-56-1	1330-20-7	-1.73	Train	-2.57269	-2.75464
methyl 3-methyl-4-thiomethoxyphenyl thiophosphate	octanol	55-38-9	111-87-5	-12.55	Train	-12.5526	-12.2913
methyl acetate	methyl acetate	79-20-9	79-20-9	-4.13719	Test	-4.43544	-4.24431
methyl acetate	1,2-Dichlorethane	79-20-9	107-06-2	-4.55	Train	-4.0755	-3.87874
methyl acetate	benzene	79-20-9	71-43-2	-4.04	Train	-3.55267	-3.95727
methyl acetate	bromobenzene	79-20-9	108-86-1	-3.87	Train	-3.77212	-3.56858
methyl acetate	bromooctane	79-20-9	111-83-1	-3.35	Train	-3.02555	-3.10983
methyl acetate	carbondisulfide	79-20-9	75-15-0	-3.67	Train	-3.77046	-3.48485
methyl acetate	carbon tetrachloride	79-20-9	56-23-5	-3.82	Train	-3.36592	-3.79753
methyl acetate	chlorobenzene	79-20-9	108-90-7	-4	Train	-3.7927	-4.46319
methyl acetate	chloroform	79-20-9	67-66-3	-4.9	Test	-3.85061	-4.67689
methyl acetate	chlorohexane	79-20-9	544-10-5	-3.66	Train	-3.1834	-3.34742
methyl acetate	cyclohexane	79-20-9	110-82-7	-3.06	Train	-3.23962	-3.1658
methyl acetate	decalin	79-20-9	91-17-8	-2.9	Train	-3.18352	-3.31032
methyl acetate	decane	79-20-9	124-18-5	-2.98	Train	-2.94551	-3.04027
methyl acetate	ethylbenzene	79-20-9	100-41-4	-3.74	Test	-3.42518	-4.11389
methyl acetate	fluorooctane	79-20-9	463-11-6	-3.59	Train	-3.12199	-3.69232
methyl acetate	heptane	79-20-9	142-82-5	-2.97	Test	-2.93086	-2.89075
methyl acetate	hexadecane	79-20-9	544-76-3	-2.67	Train	-2.71005	-3.0535
methyl acetate	hexane	79-20-9	110-54-3	-3.12	Train	-2.99242	-3.67799
methyl acetate	isopropyltoluene	79-20-9	99-87-6	-3.32	Train	-2.93401	-3.08354
methyl acetate	nonane	79-20-9	111-84-2	-3.02	Train	-2.80174	-2.72147
methyl acetate	octane	79-20-9	111-65-9	-3.06	Train	-2.84856	-2.77937
methyl acetate	octanol	79-20-9	111-87-5	-3.54	Train	-4.0506	-3.683
methyl acetate	pentadecane	79-20-9	629-62-9	-2.82	Train	-2.75506	-2.97133
methyl acetate	pentane	79-20-9	109-66-0	-3.13	Train	-3.07381	-2.2951
methyl acetate	perfluorobenzene	79-20-9	392-56-3	-4.23	Train	-3.43279	-3.63486
methyl acetate	secbutylbenzene	79-20-9	135-98-8	-3.91	Train	-3.20606	-3.11661
methyl acetate	tbutylbenzene	79-20-9	98-06-6	-3.57	Train	-3.19154	-3.70492
methyl acetate	tetrachloroethene	79-20-9	127-18-4	-3.63	Test	-3.39038	-3.49872
methyl acetate	toluene	79-20-9	108-88-3	-3.81	Train	-3.46053	-4.01273
methyl acetate	trimethylbenzene	79-20-9	526-73-8	-3.58	Train	-3.41016	-3.47868
methyl acetate	xylene (mixed isomers)	79-20-9	1330-20-7	-3.7	Test	-3.36926	-4.89364
methyl benzoate	methyl benzoate	93-58-3	93-58-3	-7.60039	Train	-7.34932	-7.51124
methyl benzoate	benzene	93-58-3	71-43-2	-6.27	Train	-6.6909	-7.05126
methyl benzoate	carbon tetrachloride	93-58-3	56-23-5	-7.19	Train	-6.50414	-6.85312
methyl benzoate	chloroform	93-58-3	67-66-3	-7.81	Test	-6.98884	-7.61303
methyl benzoate	cyclohexane	93-58-3	110-82-7	-7.01	Train	-6.37784	-6.59187
methyl benzoate	decalin	93-58-3	91-17-8	-6.76	Train	-6.32174	-7.34532
methyl benzoate	hexadecane	93-58-3	544-76-3	-6.31	Train	-5.84827	-6.02449
methyl benzoate	isooctane	93-58-3	540-84-1	-6.71	Train	-5.76358	-5.84058
methyl benzoate	octanol	93-58-3	111-87-5	-7.26	Train	-7.18882	-7.56212
methyl butanoate	hexadecane	623-42-7	544-76-3	-4.01	Train	-3.90445	-3.70411
methyl butanoate	octanol	623-42-7	111-87-5	-4.59	Train	-5.245	-4.41271
butanone	butanone	78-93-3	78-93-3	-4.55306	Test	-5.22451	-4.85803
methyl formate	methyl formate	107-31-3	107-31-3	-3.66396	Test	-3.90653	-3.74537
methyl formate	hexadecane	107-31-3	544-76-3	-1.99	Train	-1.93466	-1.98895
methyl formate	octanol	107-31-3	111-87-5	-2.82	Train	-3.27521	-2.64323
methyl hexanoate	1,2-Dichlorethane	106-70-7	107-06-2	-6.57	Train	-6.59733	-6.17113
methyl hexanoate	benzene	106-70-7	71-43-2	-6.47	Test	-6.0745	-6.68722
methyl hexanoate	butylbenzene	106-70-7	104-51-8	-6.09	Test	-5.71898	-6.25317
methyl hexanoate	carbon tetrachloride	106-70-7	56-23-5	-6.39	Test	-5.88775	-6.08595
methyl hexanoate	chloroform	106-70-7	67-66-3	-7.24	Train	-6.37244	-7.33043
methyl hexanoate	cyclohexane	106-70-7	110-82-7	-5.75	Train	-5.76145	-5.51599
methyl hexanoate	decalin	106-70-7	91-17-8	-5.51	Train	-5.70535	-5.07166
methyl hexanoate	decane	106-70-7	124-18-5	-5.48	Train	-5.46734	-5.30691
methyl hexanoate	heptane	106-70-7	142-82-5	-5.63	Train	-5.45269	-5.24094
methyl hexanoate	hexadecane	106-70-7	544-76-3	-5.43	Train	-5.23188	-4.94861
methyl hexanoate	hexane	106-70-7	110-54-3	-5.64	Train	-5.51425	-5.29798
methyl hexanoate	isopropylbenzene	106-70-7	98-82-8	-6.19	Train	-5.78794	-5.70743
methyl hexanoate	isopropyltoluene	106-70-7	99-87-6	-6.06	Train	-5.45584	-6.30793
methyl hexanoate	nonane	106-70-7	111-84-2	-5.51	Train	-5.32357	-5.62657
methyl hexanoate	octane	106-70-7	111-65-9	-5.53	Train	-5.37039	-5.12957
methyl hexanoate	pentadecane	106-70-7	629-62-9	-5.35	Train	-5.27689	-5.0266
methyl hexanoate	pentane	106-70-7	109-66-0	-5.67	Test	-5.59564	-3.97741
methyl hexanoate	perfluorobenzene	106-70-7	392-56-3	-6.21	Train	-5.95461	-5.98506
methyl hexanoate	tbutylbenzene	106-70-7	98-06-6	-6.13	Train	-5.71337	-5.91324
methyl hexanoate	toluene	106-70-7	108-88-3	-6.38	Train	-5.98236	-5.86408
methyl hexanoate	trimethylbenzene	106-70-7	526-73-8	-6.16	Train	-5.93199	-6.57803
methyl hexanoate	xylene (mixed isomers)	106-70-7	1330-20-7	-6.26	Train	-5.89109	-5.70557
methyl i-propyl ketone	methyl i-propyl ketone	563-80-4	563-80-4	-5.66922	Train	-5.81411	-5.39264
methyl isopropyl ether	octanol	598-53-8	111-87-5	-4.64	Test	-3.48583	-5.48762
methyl pentanoate	1,2-Dichlorethane	624-24-8	107-06-2	-5.97	Test	-5.92957	-5.54792
methyl pentanoate	benzene	624-24-8	71-43-2	-5.83	Train	-5.40674	-4.77636
methyl pentanoate	butylbenzene	624-24-8	104-51-8	-5.37	Train	-5.05121	-5.07743
methyl pentanoate	carbon tetrachloride	624-24-8	56-23-5	-5.71	Train	-5.21998	-5.15403
methyl pentanoate	chlorobenzene	624-24-8	108-90-7	-5.83	Train	-5.64676	-5.26853
methyl pentanoate	chloroform	624-24-8	67-66-3	-6.68	Train	-5.70468	-5.36016
methyl pentanoate	chlorohexane	624-24-8	544-10-5	-5.41	Train	-5.03746	-5.68261
methyl pentanoate	cyclohexane	624-24-8	110-82-7	-5.04	Train	-5.09368	-4.59378
methyl pentanoate	decalin	624-24-8	91-17-8	-4.83	Train	-5.03758	-4.69639
methyl pentanoate	decane	624-24-8	124-18-5	-4.77	Test	-4.79957	-4.76726
methyl pentanoate	ethylbenzene	624-24-8	100-41-4	-5.56	Train	-5.27924	-5.19243
methyl pentanoate	fluorooctane	624-24-8	463-11-6	-5.33	Train	-4.97605	-5.18617
methyl pentanoate	heptane	624-24-8	142-82-5	-4.92	Train	-4.78492	-4.61773
methyl pentanoate	hexadecane	624-24-8	544-76-3	-4.69	Train	-4.56411	-4.3254
methyl pentanoate	hexane	624-24-8	110-54-3	-4.94	Train	-4.84648	-4.67477
methyl pentanoate	isopropylbenzene	624-24-8	98-82-8	-5.45	Train	-5.12017	-5.60261
methyl pentanoate	isopropyltoluene	624-24-8	99-87-6	-5.33	Train	-4.78807	-4.89194
methyl pentanoate	nonane	624-24-8	111-84-2	-4.85	Train	-4.6558	-4.44845
methyl pentanoate	octane	624-24-8	111-65-9	-4.86	Train	-4.70262	-5.4908
methyl pentanoate	octanol	624-24-8	111-87-5	-5.13	Train	-5.90466	-5.86303
methyl pentanoate	pentadecane	624-24-8	629-62-9	-4.59	Train	-4.60912	-4.57658
methyl pentanoate	pentane	624-24-8	109-66-0	-4.96	Train	-4.92787	-5.85429
methyl pentanoate	perfluorobenzene	624-24-8	392-56-3	-5.59	Train	-5.28685	-5.36185
methyl pentanoate	tbutylbenzene	624-24-8	98-06-6	-5.39	Train	-5.04561	-4.26484
methyl pentanoate	tetrachloroethene	624-24-8	127-18-4	-5.41	Train	-5.24444	-5.20566
methyl pentanoate	toluene	624-24-8	108-88-3	-5.65	Train	-5.3146	-5.24087
methyl pentanoate	trimethylbenzene	624-24-8	526-73-8	-5.41	Train	-5.26423	-4.68446
methyl pentanoate	xylene (mixed isomers)	624-24-8	1330-20-7	-5.61	Train	-5.22332	-4.82222
methyl propanoate	methyl propanoate	554-12-1	554-12-1	-4.58175	Train	-4.78415	-4.62642
methyl propanoate	1,2-Dichlorethane	554-12-1	107-06-2	-4.87	Train	-4.62379	-4.57681
methyl propanoate	benzene	554-12-1	71-43-2	-4.58	Test	-4.10096	-6.12512
methyl propanoate	butylbenzene	554-12-1	104-51-8	-4.19	Train	-3.74544	-4.6484
methyl propanoate	carbon tetrachloride	554-12-1	56-23-5	-4.43	Train	-3.91421	-4.0202
methyl propanoate	chlorobenzene	554-12-1	108-90-7	-4.55	Train	-4.34099	-4.74587
methyl propanoate	chloroform	554-12-1	67-66-3	-5.48	Train	-4.3989	-5.70356
methyl propanoate	chlorohexane	554-12-1	544-10-5	-4.2	Train	-3.73168	-3.86115
methyl propanoate	cyclohexane	554-12-1	110-82-7	-3.71	Test	-3.78791	-4.0592
methyl propanoate	decalin	554-12-1	91-17-8	-3.5	Train	-3.73181	-3.49339
methyl propanoate	decane	554-12-1	124-18-5	-3.49	Test	-3.4938	-3.554
methyl propanoate	ethylbenzene	554-12-1	100-41-4	-4.29	Train	-3.97346	-4.80837
methyl propanoate	fluorooctane	554-12-1	463-11-6	-4.09	Train	-3.67027	-3.78442
methyl propanoate	heptane	554-12-1	142-82-5	-3.63	Test	-3.47915	-3.54237
methyl propanoate	hexadecane	554-12-1	544-76-3	-2.68	Train	-3.25834	-3.11214
methyl propanoate	hexane	554-12-1	110-54-3	-3.65	Train	-3.54071	-4.03235
methyl propanoate	isopropylbenzene	554-12-1	98-82-8	-4.19	Train	-3.8144	-3.79256
methyl propanoate	isopropyltoluene	554-12-1	99-87-6	-4.14	Train	-3.4823	-3.59727
methyl propanoate	nonane	554-12-1	111-84-2	-3.5	Train	-3.35002	-3.46814
methyl propanoate	octane	554-12-1	111-65-9	-3.57	Train	-3.39685	-3.90069
methyl propanoate	octanol	554-12-1	111-87-5	-4.06	Train	-4.59889	-4.73869
methyl propanoate	pentadecane	554-12-1	629-62-9	-3.35	Train	-3.30335	-3.19946
methyl propanoate	pentane	554-12-1	109-66-0	-3.69	Train	-3.62209	-3.49171
methyl propanoate	tbutylbenzene	554-12-1	98-06-6	-4.17	Test	-3.73983	-3.77353
methyl propanoate	tetrachloroethene	554-12-1	127-18-4	-4.39	Train	-3.93866	-4.01245
methyl propanoate	toluene	554-12-1	108-88-3	-4.62	Train	-4.00882	-4.68697
methyl propanoate	trimethylbenzene	554-12-1	526-73-8	-4.14	Train	-3.95845	-3.99241
methyl propanoate	xylene (mixed isomers)	554-12-1	1330-20-7	-4.2	Train	-3.91755	-3.8691
methyl propyl ether	octanol	557-17-5	111-87-5	-3.63	Test	-3.41333	-4.4621
methylamine	4methyl2pentanone	74-89-5	108-10-1	-4.14	Train	-3.02052	-2.99848
methylamine	benzene	74-89-5	71-43-2	-2.66	Test	-2.41371	-2.55405
methylamine	carbon tetrachloride	74-89-5	56-23-5	-2.53	Test	-2.22696	-2.35591
methylamine	chlorobenzene	74-89-5	108-90-7	-2.16	Train	-2.65374	-2.47041
methylamine	chloroform	74-89-5	67-66-3	-3.17	Train	-2.71165	-2.56205
methylamine	diethylether	74-89-5	60-29-7	-2.32	Test	-2.66968	-2.82488
methylamine	octanol	74-89-5	111-87-5	-3.78	Train	-2.91164	-4.08834
methylamine	pentanol	74-89-5	71-41-0	-3.95	Train	-3.13402	-3.90317
methylamine	toluene	74-89-5	108-88-3	-2.65	Train	-2.32157	-3.7203
methylamine	xylene (mixed isomers)	74-89-5	1330-20-7	-3.2	Train	-2.2303	-2.28424
methylcyclohexane	octanol	108-87-2	111-87-5	-3.21	Train	-4.28647	-5.03655
methylhydrazine	octanol	60-34-4	111-87-5	-3.88	Train	-3.70536	-3.67979
m-hydroxybenzaldehyde	1,2-Dichlorethane	100-83-4	107-06-2	-10.11	Train	-8.88482	-8.69346
m-hydroxybenzaldehyde	benzene	100-83-4	71-43-2	-9.29	Train	-8.36199	-8.49771
morpholine	morpholine	110-91-8	110-91-8	-5.90106	Train	-5.69031	-5.79614
morpholine	octanol	110-91-8	111-87-5	-5.99	Test	-4.93284	-5.01259
3-methylaniline	acetonitrile	108-44-1	75-05-8	-8.04	Train	-7.76817	-7.46402
3-methylaniline	methanol	108-44-1	67-56-1	-7.75	Train	-8.4623	-7.68115
m-xylene	m-xylene	108-38-3	108-38-3	-5.81263	Test	-5.6146	-6.00347
m-Xylene	acetonitrile	108-38-3	75-05-8	-5.28	Train	-6.49062	-5.20403
m-xylene	carbon tetrachloride	108-38-3	56-23-5	-5.71	Train	-5.60023	-5.98617
m-xylene	chloroform	108-38-3	67-66-3	-5.86	Train	-6.08492	-6.17906
m-xylene	cyclohexane	108-38-3	110-82-7	-5.52	Train	-5.47393	-5.17931
m-xylene	diethylether	108-38-3	60-29-7	-5.56	Test	-6.04294	-5.80657
m-xylene	heptane	108-38-3	142-82-5	-5.67	Train	-5.16517	-5.79522
m-xylene	hexadecane	108-38-3	544-76-3	-5.24	Train	-4.94436	-5.1599
m-xylene	hexane	108-38-3	110-54-3	-4.99	Train	-5.22673	-5.39347
m-xylene	isooctane	108-38-3	540-84-1	-5.12	Train	-4.85966	-5.36069
m-xylene	octanol	108-38-3	111-87-5	-5.25	Train	-6.28491	-5.10127
N,N-diethylformamide	N,N-diethylformamide	617-84-5	617-84-5	-6.91205	Train	-6.5271	-5.79954
N,N-dimethylacetamide	dimethylacetamide	127-19-5	127-19-5	-6.77	Train	-5.81514	-5.58313
N,N-dimethylacetamide	heptane	127-19-5	142-82-5	-4.8	Train	-3.8214	-3.84032
N,N-dimethylaniline	N,N-dimethylaniline	121-69-7	121-69-7	-7.25144	Train	-6.95339	-7.01966
dimethylformamide	cyclohexane	68-12-2	110-82-7	-3.82	Train	-3.42004	-3.42704
dimethylformamide	dimethylformamide	68-12-2	68-12-2	-6.47	Test	-5.19696	-6.56783
naphthalene	4methyl2pentanone	91-20-3	108-10-1	-7.45	Test	-7.51815	-7.01179
naphthalene	butylacetate	91-20-3	123-86-4	-7.59	Train	-7.30767	-7.28872
naphthalene	carbon tetrachloride	91-20-3	56-23-5	-7.55	Test	-6.72459	-7.43183
naphthalene	chloroform	91-20-3	67-66-3	-7.89	Train	-7.20928	-7.87971
naphthalene	cyclohexane	91-20-3	110-82-7	-7.17	Test	-6.59829	-7.41233
naphthalene	diethylether	91-20-3	60-29-7	-7.25	Train	-7.16731	-7.2641
naphthalene	diisopropylether	91-20-3	108-20-3	-7.24	Train	-6.99665	-7.09058
naphthalene	heptane	91-20-3	142-82-5	-7.02	Train	-6.28953	-7.13728
naphthalene	octanol	91-20-3	111-87-5	-6.97	Train	-7.40927	-8.38258
naproxen	octanol	22204-53-1	111-87-29	-14.55	Train	-13.525	-13.9475
n-butane	octanol	106-97-8	111-87-5	-1.86	Train	-2.50515	-3.25178
n-butanoic acid	n-butanoic acid	107-92-6	107-92-6	-7.36855	Train	-6.57352	-6.55445
n-butyl acetate	butylacetate	123-86-4	123-86-4	-5.58318	Test	-6.09697	-5.41669
n-butylamine	n-butylamine	109-73-9	109-73-9	-4.49331	Train	-4.95997	-4.8472
n-decanol	n-decanol	112-30-1	112-30-1	-9.57936	Train	-9.03436	-8.70384
n-dodecanol	n-dodecanol	112-53-8	112-53-8	-10.9082	Test	-10.3462	-9.95371
n-heptane	octanol	142-82-5	111-87-5	-3.74	Train	-4.64526	-5.14488
n-heptanoic acid	n-heptanoic acid	111-14-8	111-14-8	-9.8829	Train	-9.38768	-8.52754
n-hexane	benzene	110-54-3	71-43-2	-3.62	Train	-3.4395	-3.55043
n-hexane	isooctane	110-54-3	540-84-1	-3.08	Train	-2.51218	-2.7938
n-hexane	octanol	110-54-3	111-87-5	-3.01	Train	-3.93742	-3.19426
n-hexanol	n-hexanol	111-27-3	111-27-3	-7.17257	Train	-6.73033	-6.66288
nitrobenzene	nitrobenzene	98-95-3	98-95-3	-7.96607	Train	-8.52686	-8.66077
nitrobenzene	benzene	98-95-3	71-43-2	-7.6	Train	-6.53133	-6.47694
nitrobenzene	carbon tetrachloride	98-95-3	56-23-5	-6.92	Train	-6.34458	-6.53505
nitrobenzene	chloroform	98-95-3	67-66-3	-7.78	Test	-6.82927	-6.93856
nitrobenzene	cyclohexane	98-95-3	110-82-7	-6.62	Train	-6.21828	-6.35296
nitrobenzene	decalin	98-95-3	91-17-8	-6.36	Train	-6.16218	-6.52942
nitrobenzene	diethylether	98-95-3	60-29-7	-6.85	Train	-6.7873	-7.59663
nitrobenzene	heptane	98-95-3	142-82-5	-6.14	Train	-5.90952	-6.04004
nitrobenzene	hexadecane	98-95-3	544-76-3	-6.22	Test	-5.68871	-5.90379
nitrobenzene	hexane	98-95-3	110-54-3	-6.09	Train	-5.97108	-5.94338
nitrobenzene	nitrobenzene	98-95-3	98-95-3	-7.94	Train	-8.18808	-8.66077
nitrobenzene	octanol	98-95-3	111-87-5	-6.63	Train	-7.02926	-7.44142
nitroethane	nitroethane	79-24-3	79-24-3	-5.58318	Train	-5.9004	-5.79095
nitroethane	hexadecane	79-24-3	544-76-3	-3.29	Train	-3.64311	-3.59876
nitroethane	hexane	79-24-3	110-54-3	-3.19	Train	-3.92549	-3.36055
nitroethane	nitroethane	79-24-3	79-24-3	-5.53	Train	-5.758	-4.88587
nitromethane	nitromethane	75-52-5	75-52-5	-5.41827	Train	-5.64044	-5.11222
nitromethane	aceticacid	75-52-5	64-19-7	-4.88	Train	-4.93921	-4.47051
nitromethane	acetonitrile	75-52-5	75-05-8	-5.62	Train	-5.16738	-4.99558
nitromethane	acetophenone	75-52-5	98-86-2	-4.92	Train	-4.84769	-4.78923
nitromethane	aniline	75-52-5	62-53-3	-5.11	Train	-4.92814	-5.06884
nitromethane	anisole	75-52-5	100-66-3	-4.69	Test	-4.3069	-4.39893
nitromethane	benzene	75-52-5	71-43-2	-4.5	Train	-4.01363	-4.85803
nitromethane	benzonitrile	75-52-5	100-47-0	-5.05	Train	-5.12221	-4.40127
nitromethane	benzylalcohol	75-52-5	100-51-6	-4.53	Train	-4.87002	-4.22782
nitromethane	bromobenzene	75-52-5	108-86-1	-4.25	Train	-4.23307	-4.78582
nitromethane	bromoethane	75-52-5	106-93-4	-4.54	Test	-4.42692	-4.73641
nitromethane	butanol	75-52-5	71-36-3	-3.93	Train	-4.85546	-4.08158
nitromethane	butanone	75-52-5	78-93-3	-5.24	Test	-4.85607	-4.81841
nitromethane	carbondisulfide	75-52-5	75-15-0	-3.3	Test	-4.23141	-3.63672
nitromethane	carbon tetrachloride	75-52-5	56-23-5	-3.52	Test	-3.82687	-3.98387
nitromethane	chlorobenzene	75-52-5	108-90-7	-4.32	Test	-4.25365	-4.09837
nitromethane	chloroform	75-52-5	67-66-3	-4.68	Test	-4.31157	-4.80291
nitromethane	cyclohexane	75-52-5	110-82-7	-2.86	Train	-3.70057	-2.91219
nitromethane	cyclohexanone	75-52-5	108-94-1	-5.09	Test	-4.94654	-4.69678
nitromethane	decane	75-52-5	124-18-5	-2.81	Train	-3.40646	-3.5971
nitromethane	dibutylether	75-52-5	142-96-1	-3.67	Train	-3.91779	-4.04872
nitromethane	diethylether	75-52-5	60-29-7	-4.19	Test	-4.26959	-4.38351
nitromethane	diisopropylether	75-52-5	108-20-3	-3.9	Train	-4.09893	-4.35919
nitromethane	dimethylacetamide	75-52-5	127-19-5	-5.62	Test	-5.38556	-6.04941
nitromethane	dimethylformamide	75-52-5	68-12-2	-5.66	Train	-5.4775	-5.7592
nitromethane	Diphenylether	75-52-5	101-84-8	-4.19	Test	-4.05788	-3.87096
nitromethane	DMSO	75-52-5	67-68-5	-5.66	Train	-5.73926	-5.41518
nitromethane	ethanol	75-52-5	64-17-5	-4.34	Train	-5.14284	-5.1789
nitromethane	ethoxybenzene	75-52-5	103-73-1	-4.45	Train	-3.98114	-4.45353
nitromethane	ethylacetate	75-52-5	141-78-6	-5.06	Train	-4.60168	-4.6884
nitromethane	fluorobenzene	75-52-5	462-06-6	-4.62	Train	-4.29538	-4.02761
nitromethane	hexadecane	75-52-5	544-76-3	-2.58	Train	-3.171	-3.87403
nitromethane	hexane	75-52-5	110-54-3	-2.9	Train	-3.45337	-2.95441
nitromethane	iodobenzene	75-52-5	591-50-4	-4.1	Train	-4.14908	-4.7915
nitromethane	isooctane	75-52-5	540-84-1	-2.82	Train	-3.08631	-2.68573
nitromethane	isopropanol	75-52-5	67-63-0	-4	Train	-4.94283	-3.54154
nitromethane	mcresol	75-52-5	108-39-4	-4.73	Test	-4.7033	-5.81914
nitromethane	methoxyethanol	75-52-5	109-86-4	-5.06	Train	-5.37068	-5.53211
nitromethane	dichloromethane	75-52-5	75-09-2	-5.05	Train	-4.66787	-4.97226
nitromethane	methylformamide	75-52-5	123-39-7	-5.11	Train	-5.14955	-5.71807
nitromethane	nitrobenzene	75-52-5	98-95-3	-4.9	Train	-5.67037	-3.63318
nitromethane	nitroethane	75-52-5	79-24-3	-5.35	Train	-5.28589	-5.34018
nitromethane	nitromethane	75-52-5	75-52-5	-5.38	Train	-5.49244	-5.11222
nitromethane	perfluorobenzene	75-52-5	392-56-3	-4.3	Train	-3.89374	-4.19169
nitromethane	propanol	75-52-5	71-23-8	-4.04	Train	-4.98795	-3.62518
nitromethane	pyridine	75-52-5	110-86-1	-5.11	Train	-4.92707	-4.81387
nitromethane	tetrahydrofuran	75-52-5	109-99-9	-5.09	Train	-4.71777	-5.58346
nitromethane	tetrahydrothiophenedioxide	75-52-5	126-33-0	-5.28	Train	-4.48976	-5.12029
nitromethane	toluene	75-52-5	108-88-3	-4.31	Train	-3.92149	-4.70153
nitromethane	triethylamine	75-52-5	121-44-8	-3.63	Train	-4.06479	-3.40448
nitromethane	xylene (mixed isomers)	75-52-5	1330-20-7	-4.2	Train	-3.83022	-3.9122
N-methylaniline	N-methylaniline	100-61-8	100-61-8	-7.60517	Train	-7.93529	-7.77118
N-methylaniline	benzene	100-61-8	71-43-2	-6.64	Test	-7.06259	-6.95348
N-methylaniline	carbon tetrachloride	100-61-8	56-23-5	-6.58	Train	-6.87584	-6.9991
N-methylaniline	cyclohexane	100-61-8	110-82-7	-6.33	Train	-6.74954	-5.87509
N-methylaniline	decalin	100-61-8	91-17-8	-6.41	Train	-6.69344	-5.97858
N-methylaniline	hexadecane	100-61-8	544-76-3	-6.19	Train	-6.21997	-6.17047
N-methylaniline	octanol	100-61-8	111-87-5	-6.94	Train	-7.56052	-7.7081
n-octane	2methylpyridine	111-65-9	109-06-8	-4.73	Test	-5.53586	-5.20871
n-octane	anisole	111-65-9	100-66-3	-4.62	Train	-5.13509	-4.15093
n-octane	benzene	111-65-9	71-43-2	-5.35	Train	-4.84182	-4.18294
n-octane	bromobenzene	111-65-9	108-86-1	-5.02	Train	-5.06127	-5.32833
n-octane	bromoethane	111-65-9	106-93-4	-5.54	Train	-5.25512	-5.56571
n-octane	butanol	111-65-9	71-36-3	-4.45	Test	-5.68365	-4.78516
n-octane	butanone	111-65-9	78-93-3	-4.64	Train	-5.68426	-5.90101
n-octane	carbon tetrachloride	111-65-9	56-23-5	-5.39	Train	-4.65507	-5.3338
n-octane	chlorobenzene	111-65-9	108-90-7	-5.16	Train	-5.08185	-5.18097
n-octane	chloroform	111-65-9	67-66-3	-5.25	Train	-5.13976	-5.37004
n-octane	cyclohexanone	111-65-9	108-94-1	-4.57	Train	-5.77473	-4.17122
n-octane	dibutylether	111-65-9	142-96-1	-5.24	Train	-4.74599	-5.13131
n-octane	diethylether	111-65-9	60-29-7	-5.62	Train	-5.09778	-5.5447
n-octane	diisopropylether	111-65-9	108-20-3	-5.38	Train	-4.92713	-5.44179
n-octane	dimethylpyridine	111-65-9	108-48-5	-4.88	Test	-5.28454	-4.91319
n-octane	Diphenylether	111-65-9	101-84-8	-4.38	Train	-4.88607	-5.28341
n-octane	ethoxybenzene	111-65-9	103-73-1	-4.75	Test	-4.80934	-4.86225
n-octane	ethylacetate	111-65-9	141-78-6	-4.72	Train	-5.42987	-5.24712
n-octane	fluorobenzene	111-65-9	462-06-6	-4.99	Train	-5.12357	-4.47205
n-octane	iodobenzene	111-65-9	591-50-4	-4.72	Train	-4.97727	-4.26962
n-octane	isopropanol	111-65-9	67-63-0	-4.5	Test	-5.77102	-4.18201
n-octane	dichloromethane	111-65-9	75-09-2	-5.18	Train	-5.49607	-5.15043
n-octane	octanol	111-65-9	111-87-5	-4.18	Train	-5.33974	-5.77547
n-octane	propanol	111-65-9	71-23-8	-4.39	Train	-5.81614	-6.18837
n-octane	pyridine	111-65-9	110-86-1	-4.5	Train	-5.75526	-6.21075
n-octane	tetrahydrofuran	111-65-9	109-99-9	-5.39	Train	-5.54596	-5.06647
n-octane	toluene	111-65-9	108-88-3	-5.38	Test	-4.74968	-6.10095
n-octane	triethylamine	111-65-9	121-44-8	-5.62	Test	-4.89298	-5.50744
n-octanol	n-octanol	111-87-5	111-87-5	-8.51339	Train	-7.94546	-7.7858
n-Pentane	acetonitrile	109-66-0	75-05-8	-2.08	Train	-3.42896	-3.63848
n-pentane	benzene	109-66-0	71-43-2	-2.99	Test	-2.72533	-3.37215
n-pentane	octanol	109-66-0	111-87-5	-2.45	Train	-3.22325	-3.88301
n-pentanoic acid	n-pentanoic acid	109-52-4	109-52-4	-8.14771	Train	-7.24896	-7.22447
n-propane	hexadecane	74-98-6	544-76-3	-1.43	Train	-0.447321	-1.08163
n-propane	octanol	74-98-6	111-87-5	-1.26	Train	-1.78787	-2.61926
o-chloroaniline	o-chloroaniline	95-51-2	95-51-2	-7.60517	Train	-8.22076	-7.95308
o-cresol	1,2-Dichlorethane	95-48-7	107-06-2	-7.73	Train	-7.76606	-7.61959
o-cresol	acetonitrile	95-48-7	75-05-8	-7.92	Train	-7.94686	-7.69016
o-cresol	benzene	95-48-7	71-43-2	-7.44	Train	-7.24323	-7.79958
o-cresol	bromobenzene	95-48-7	108-86-1	-6.87	Train	-7.46267	-7.36723
o-cresol	bromoform	95-48-7	75-25-2	-7.45	Train	-7.33045	-8.31614
o-cresol	carbondisulfide	95-48-7	75-15-0	-6.27	Test	-7.46101	-5.41734
o-cresol	carbon tetrachloride	95-48-7	56-23-5	-6.51	Train	-7.05648	-7.2257
o-cresol	chlorobenzene	95-48-7	108-90-7	-7.33	Test	-7.48326	-7.3402
o-cresol	chlorobenzene	95-48-7	108-90-7	-6.96	Test	-7.48326	-7.3402
o-cresol	chloroform	95-48-7	67-66-3	-7.55	Test	-7.54117	-7.67358
o-cresol	cyclohexane	95-48-7	110-82-7	-6.02	Test	-6.93018	-6.22441
o-cresol	decanol	95-48-7	112-30-1	-8.58	Test	-7.51758	-7.59002
o-cresol	ethylbenzene	95-48-7	100-41-4	-7.25	Train	-7.11573	-7.15403
o-cresol	heptane	95-48-7	142-82-5	-6.01	Train	-6.62142	-5.95453
o-cresol	heptanol	95-48-7	111-70-6	-8.78	Test	-7.80529	-7.97305
o-cresol	hexadecane	95-48-7	544-76-3	-5.78	Train	-6.4006	-5.73116
o-cresol	hexane	95-48-7	110-54-3	-6.25	Train	-6.68298	-6.74644
o-cresol	hexanol	95-48-7	111-27-3	-8.76	Train	-7.86206	-8.05806
o-cresol	iodobenzene	95-48-7	591-50-4	-7.14	Train	-7.37868	-7.34532
o-cresol	iodobenzene	95-48-7	591-50-4	-6.76	Train	-7.37868	-6.42537
o-cresol	isooctane	95-48-7	540-84-1	-5.68	Test	-6.31591	-5.9706
o-Cresol	methanol	95-48-7	67-56-1	-7.72	Train	-8.64099	-8.46222
o-cresol	nitrobenzene	95-48-7	98-95-3	-8.16	Train	-8.89998	-9.15404
o-cresol	nonane	95-48-7	111-84-2	-6.2	Train	-6.49229	-5.93015
o-cresol	octane	95-48-7	111-65-9	-6.16	Train	-6.53912	-5.33465
o-cresol	octanol	95-48-7	111-87-5	-8.49	Train	-7.74115	-7.93469
o-cresol	pentanol	95-48-7	71-41-0	-8.57	Train	-7.96353	-8.13283
o-cresol	toluene	95-48-7	108-88-3	-7.43	Test	-7.15109	-7.31254
o-cresol	xylene (mixed isomers)	95-48-7	1330-20-7	-7.25	Train	-7.05982	-8.14254
octanal	hexadecane	124-13-0	544-76-3	-5.98	Test	-6.08841	-5.75692
2-methylaniline	acetonitrile	95-53-4	75-05-8	-7.85	Train	-7.68657	-7.42007
2-methylaniline	methanol	95-53-4	67-56-1	-7.54	Train	-8.38069	-8.19213
o-xylene	o-xylene	95-47-6	95-47-6	-5.95603	Train	-5.59015	-5.98005
o-Xylene	acetonitrile	95-47-6	75-05-8	-5.43	Train	-6.34024	-6.37053
o-xylene	carbon tetrachloride	95-47-6	56-23-5	-6.07	Train	-5.44985	-5.90606
o-xylene	chloroform	95-47-6	67-66-3	-6.23	Train	-5.93455	-6.1122
o-xylene	cyclohexane	95-47-6	110-82-7	-5.54	Train	-5.32355	-5.64482
o-xylene	diethylether	95-47-6	60-29-7	-5.58	Train	-5.89257	-6.37503
o-xylene	heptane	95-47-6	142-82-5	-5.52	Train	-5.0148	-5.47633
o-xylene	hexadecane	95-47-6	544-76-3	-5.37	Test	-4.79398	-5.14966
o-xylene	hexane	95-47-6	110-54-3	-5.22	Train	-5.07635	-4.54727
o-xylene	octanol	95-47-6	111-87-5	-5.07	Train	-6.13453	-6.61506
p-chloroacetophenone	p-chloroacetophenone	99-91-2	99-91-2	-9.92831	Train	-8.94419	-9.05684
p-cresol	1,2-Dibromoethane	106-44-5	106-93-4	-7.52	Train	-7.79646	-7.7865
p-cresol	1,2-Dichlorethane	106-44-5	107-06-2	-7.75	Train	-7.906	-7.16323
p-Cresol	acetonitrile	106-44-5	75-05-8	-8.08	Train	-8.0868	-7.75173
p-cresol	benzene	106-44-5	71-43-2	-7.35	Train	-7.38317	-7.4854
p-cresol	bromobenzene	106-44-5	108-86-1	-7.12	Train	-7.60261	-6.77171
p-cresol	carbon tetrachloride	106-44-5	56-23-5	-6.32	Train	-7.19641	-7.1907
p-cresol	chlorobenzene	106-44-5	108-90-7	-7.23	Train	-7.62319	-6.54013
p-cresol	chloroform	106-44-5	67-66-3	-7.59	Train	-7.68111	-7.23212
p-cresol	decane	106-44-5	124-18-5	-6	Train	-6.776	-5.86725
p-cresol	decanol	106-44-5	112-30-1	-8.91	Test	-7.65752	-7.65158
p-cresol	heptane	106-44-5	142-82-5	-5.77	Train	-6.76135	-6.75097
p-cresol	heptanol	106-44-5	111-70-6	-9.16	Train	-7.94523	-8.03461
p-cresol	hexadecane	106-44-5	544-76-3	-5.88	Train	-6.54054	-6.45863
p-cresol	hexane	106-44-5	110-54-3	-5.86	Test	-6.82291	-5.58783
p-cresol	iodobenzene	106-44-5	591-50-4	-7.01	Train	-7.51862	-7.40688
p-cresol	isooctane	106-44-5	540-84-1	-5.59	Train	-6.45585	-6.27472
p-Cresol	methanol	106-44-5	67-56-1	-7.84	Train	-8.78093	-7.20158
p-cresol	dichloromethane	106-44-5	75-09-2	-7.71	Test	-8.03741	-7.70466
p-cresol	nitrobenzene	106-44-5	98-95-3	-8.13	Train	-9.03991	-9.21561
p-cresol	octane	106-44-5	111-65-9	-6.19	Train	-6.67905	-6.63959
p-cresol	octanol	106-44-5	111-87-5	-8.84	Train	-7.88109	-7.99626
p-cresol	pentanol	106-44-5	71-41-0	-9.25	Train	-8.10347	-8.19439
p-cresol	toluene	106-44-5	108-88-3	-7.56	Test	-7.29103	-7.3741
p-cresol	xylene (mixed isomers)	106-44-5	1330-20-7	-7.18	Train	-7.19975	-7.21559
pentamethylene sulfide	pentamethylene sulfide	1613-51-0	1613-51-0	-5.94408	Train	-5.61287	-5.37942
pentanal	hexadecane	110-62-3	544-76-3	-3.89	Train	-4.08793	-3.89043
pentanal	isooctane	110-62-3	540-84-1	-4.24	Train	-4.00323	-4.49238
pentanoic acid	1,2-Dichlorethane	109-52-4	107-06-2	-6.47	Train	-6.91782	-5.00702
pentanoic acid	benzene	109-52-4	71-43-2	-6.01	Train	-6.39499	-6.6894
pentanoic acid	butanol	109-52-4	71-36-3	-8.02	Test	-7.23682	-7.20433
pentanoic acid	butanone	109-52-4	78-93-3	-7.54	Train	-7.23743	-7.00847
pentanoic acid	chloroform	109-52-4	67-66-3	-6.61	Train	-6.69293	-6.38007
pentanoic acid	diisopropylether	109-52-4	108-20-3	-7.59	Train	-6.48029	-8.19602
pentanoic acid	heptane	109-52-4	142-82-5	-5.23	Train	-5.77318	-5.63764
pentanoic acid	hexadecane	109-52-4	544-76-3	-4.61	Train	-5.55236	-6.25291
pentanoic acid	isobutanol	109-52-4	78-83-1	-8.06	Train	-7.18917	-7.19801
pentanoic acid	pentanol	109-52-4	71-41-0	-8.17	Train	-7.11529	-7.59925
pentanoic acid	2-butanol	109-52-4	78-92-2	-7.61	Train	-7.20141	-7.21103
pentanoic acid	toluene	109-52-4	108-88-3	-5.89	Train	-6.30285	-5.98412
pentanoic acid	xylene (mixed isomers)	109-52-4	1330-20-7	-5.71	Train	-6.21158	-6.10226
pentyl acetate	1,2-Dichlorethane	628-63-7	107-06-2	-6.64	Test	-6.74824	-7.19724
pentyl acetate	benzene	628-63-7	71-43-2	-6.53	Train	-6.22541	-6.57385
pentyl acetate	bromobenzene	628-63-7	108-86-1	-6.35	Train	-6.44485	-6.03328
pentyl acetate	bromooctane	628-63-7	111-83-1	-5.81	Train	-5.69828	-5.67827
pentyl acetate	carbon tetrachloride	628-63-7	56-23-5	-6.35	Train	-6.03866	-5.89174
pentyl acetate	chlorobenzene	628-63-7	108-90-7	-6.49	Train	-6.46544	-6.45423
pentyl acetate	chloroform	628-63-7	67-66-3	-7.36	Train	-6.52335	-6.09788
pentyl acetate	cyclohexane	628-63-7	110-82-7	-5.71	Test	-5.91236	-5.88499
pentyl acetate	decalin	628-63-7	91-17-8	-5.44	Train	-5.85625	-5.41911
pentyl acetate	decane	628-63-7	124-18-5	-5.31	Train	-5.61825	-5.13395
pentyl acetate	ethylbenzene	628-63-7	100-41-4	-6.2	Test	-6.09791	-5.1817
pentyl acetate	heptane	628-63-7	142-82-5	-5.42	Test	-5.6036	-5.20254
pentyl acetate	hexadecane	628-63-7	544-76-3	-5.2	Train	-5.38278	-5.05149
pentyl acetate	hexane	628-63-7	110-54-3	-5.52	Train	-5.66516	-5.44276
pentyl acetate	isopropylbenzene	628-63-7	98-82-8	-6.13	Train	-5.93885	-5.61
pentyl acetate	isopropyltoluene	628-63-7	99-87-6	-6.02	Train	-5.60675	-5.54824
pentyl acetate	nonane	628-63-7	111-84-2	-5.33	Test	-5.47447	-4.99767
pentyl acetate	octane	628-63-7	111-65-9	-5.36	Train	-5.5213	-5.24407
pentyl acetate	pentadecane	628-63-7	629-62-9	-5.18	Train	-5.42779	-5.48387
pentyl acetate	pentane	628-63-7	109-66-0	-5.62	Test	-5.74654	-5.62561
pentyl acetate	perfluorobenzene	628-63-7	392-56-3	-6.16	Train	-6.10552	-5.82888
pentyl acetate	secbutylbenzene	628-63-7	135-98-8	-5.98	Test	-5.87879	-4.87476
pentyl acetate	tbutylbenzene	628-63-7	98-06-6	-5.92	Train	-5.86428	-5.72451
pentyl acetate	toluene	628-63-7	108-88-3	-6.41	Train	-6.13327	-6.52647
pentyl acetate	trimethylbenzene	628-63-7	526-73-8	-6.09	Train	-6.0829	-6.76946
pentyl acetate	xylene (mixed isomers)	628-63-7	1330-20-7	-6.19	Train	-6.042	-5.82007
pentylamine	hexadecane	110-58-7	544-76-3	-4.28	Train	-4.20404	-3.97651
pentylamine	xylene (mixed isomers)	110-58-7	1330-20-7	-4.7	Test	-4.86326	-4.72187
perfluoro(methylcyclohexane)	perfluoro(methylcyclohexane)	355-02-2	355-02-2	-4.02964	Train	-4.73678	-3.60636
perfluorobenzene	perfluorobenzene	392-56-3	392-56-3	-4.42	Train	-4.13592	-4.90769
perfluoro-n-heptane	perfluoro-n-heptane	335-57-9	335-57-9	-4.13958	Train	-5.04038	-3.2265
perfluoro-n-hexane	perfluoro-n-hexane	355-42-0	355-42-0	-3.58031	Test	-4.0407	-2.62295
phenol	phenol	108-95-2	108-95-2	-7.78921	Test	-7.55713	-7.50764
phenol	1,2-Dibromoethane	108-95-2	106-93-4	-7.22	Train	-6.99085	-7.07282
phenol	1,2-Dichlorethane	108-95-2	107-06-2	-7.48	Train	-7.10038	-6.96747
phenol	benzene	108-95-2	71-43-2	-7.12	Train	-6.57755	-7.4288
phenol	bromoform	108-95-2	75-25-2	-6.88	Train	-6.66477	-6.35967
phenol	butylbenzene	108-95-2	104-51-8	-6.76	Train	-6.22203	-6.38049
phenol	carbon tetrachloride	108-95-2	56-23-5	-6.14	Train	-6.3908	-5.9425
phenol	chloroform	108-95-2	67-66-3	-7.14	Train	-6.87549	-6.77971
phenol	cyclohexane	108-95-2	110-82-7	-5.57	Train	-6.2645	-5.35534
phenol	decalin	108-95-2	91-17-8	-5.38	Train	-6.2084	-5.15331
phenol	decane	108-95-2	124-18-5	-5.5	Test	-5.97039	-4.70117
phenol	ethylbenzene	108-95-2	100-41-4	-6.82	Train	-6.45006	-6.61198
phenol	heptane	108-95-2	142-82-5	-5.32	Train	-5.95574	-6.03728
phenol	hexadecane	108-95-2	544-76-3	-5.14	Train	-5.73493	-4.82143
phenol	hexane	108-95-2	110-54-3	-5.49	Train	-6.0173	-6.09432
phenol	isooctane	108-95-2	540-84-1	-5.3	Test	-5.65023	-5.30567
phenol	dichloromethane	108-95-2	75-09-2	-7.5	Test	-7.2318	-6.99098
phenol	nitrobenzene	108-95-2	98-95-3	-7.86	Train	-8.2343	-8.50192
phenol	nonane	108-95-2	111-84-2	-5.6	Train	-5.82662	-5.868
phenol	octane	108-95-2	111-65-9	-5.47	Train	-5.87344	-6.27189
phenol	2-nitrotoluene	108-95-2	88-72-2	-7.79	Train	-7.33105	-7.09044
phenol	pentane	108-95-2	109-66-0	-5.67	Train	-6.09869	-5.75681
phenol	tetrachloroethene	108-95-2	127-18-4	-6.1	Train	-6.41526	-6.30828
phenol	toluene	108-95-2	108-88-3	-6.93	Train	-6.48541	-6.66042
phenol	xylene (mixed isomers)	108-95-2	1330-20-7	-6.83	Train	-6.39414	-6.50191
phosphorus oxychloride	phosphorus oxychloride	10025-87-3	10025-87-3	-5.11951	Train	-4.87035	-4.76133
p-hydroxybenzaldehyde	carbon tetrachloride	123-08-0	56-23-5	-8.16	Train	-8.18924	-8.39758
piperazine	octanol	110-85-0	111-87-5	-5.8	Train	-5.05921	-5.25367
piperidine	piperidine	110-89-4	110-89-4	-5.13624	Train	-5.27186	-5.45276
piperidine	benzene	110-89-4	71-43-2	-5.03	Train	-4.72556	-4.90647
piperidine	diethylether	110-89-4	60-29-7	-4.82	Test	-4.98153	-5.12105
piperidine	isobutanol	110-89-4	78-83-1	-6.17	Train	-5.51974	-5.51604
piperidine	octanol	110-89-4	111-87-5	-6.27	Train	-5.22349	-7.2835
piperidine	xylene (mixed isomers)	110-89-4	1330-20-7	-5.15	Train	-4.54215	-5.90345
p-methoxybenzaldehyde	p-methoxybenzaldehyde	123-11-5	123-11-5	-9.01531	Train	-9.97675	-8.49063
propanal	diethylether	123-38-6	60-29-7	-3.85	Test	-3.87757	-4.36625
propanal	hexadecane	123-38-6	544-76-3	-2.48	Train	-2.77898	-2.5074
propanal	octanol	123-38-6	111-87-5	-4.13	Train	-4.11953	-4.39077
propanoic acid	propanoic acid	79-09-4	79-09-4	-6.62525	Train	-5.92647	-6.20561
propanoic acid	1,2-Dichlorethane	79-09-4	107-06-2	-5.12	Train	-5.58978	-5.11433
propanoic acid	4methyl2pentanone	79-09-4	108-10-1	-6.85	Train	-5.67375	-6.65237
propanoic acid	aniline	79-09-4	62-53-3	-6.2	Train	-5.98146	-5.61661
propanoic acid	benzene	79-09-4	71-43-2	-4.75	Train	-5.06695	-5.20888
propanoic acid	bromoethane	79-09-4	106-93-4	-5.52	Train	-5.48025	-5.71168
propanoic acid	butanone	79-09-4	78-93-3	-7.05	Train	-5.90939	-6.66288
propanoic acid	carbon tetrachloride	79-09-4	56-23-5	-4.09	Test	-4.8802	-4.03393
propanoic acid	chlorobenzene	79-09-4	108-90-7	-4.38	Train	-5.30698	-5.05802
propanoic acid	chloroform	79-09-4	67-66-3	-5.37	Test	-5.36489	-5.18889
propanoic acid	cyclohexane	79-09-4	110-82-7	-3.78	Train	-4.7539	-4.68228
propanoic acid	cyclohexanone	79-09-4	108-94-1	-7.18	Train	-5.99986	-5.82772
propanoic acid	decalin	79-09-4	91-17-8	-4.42	Train	-4.6978	-3.64995
propanoic acid	dibutylether	79-09-4	142-96-1	-6.11	Train	-4.97112	-4.89879
propanoic acid	heptane	79-09-4	142-82-5	-4.06	Train	-4.44514	-4.64977
propanoic acid	isobutanol	79-09-4	78-83-1	-6.98	Test	-5.86113	-5.96759
propanoic acid	isopropylbenzene	79-09-4	98-82-8	-4.23	Train	-4.78039	-3.67528
propanoic acid	2-nitrotoluene	79-09-4	88-72-2	-5.3	Train	-5.82045	-5.06039
propanoic acid	2-butanol	79-09-4	78-92-2	-7	Train	-5.87337	-5.98062
propanoic acid	toluene	79-09-4	108-88-3	-4.57	Train	-4.97481	-3.54879
propanoic acid	xylene (mixed isomers)	79-09-4	1330-20-7	-4.72	Train	-4.88354	-5.13704
propene	hexadecane	115-07-1	544-76-3	-1.29	Test	-1.74351	-2.17865
propene	isooctane	115-07-1	540-84-1	-1.61	Train	-1.65882	-1.73803
propanal	propanal	123-38-6	123-38-6	-3.96033	Train	-4.61355	-4.12897
propionitrile	propionitrile	107-12-0	107-12-0	-5.11473	Train	-4.21599	-4.12401
propionitrile	hexadecane	107-12-0	544-76-3	-2.84	Train	-2.03271	-2.3704
propionitrile	octanol	107-12-0	111-87-5	-3.66	Train	-3.37326	-3.90803
propiophenone	propiophenone	93-55-0	93-55-0	-8.19313	Train	-8.12055	-8.0384
propyl acetate	propyl acetate	109-60-4	109-60-4	-5.01913	Train	-5.51931	-5.27184
propyl acetate	1,2-Dichlorethane	109-60-4	107-06-2	-5.4	Test	-5.41249	-4.9037
propyl acetate	benzene	109-60-4	71-43-2	-5.21	Train	-4.88966	-4.44119
propyl acetate	bromobenzene	109-60-4	108-86-1	-4.93	Train	-5.10911	-5.37564
propyl acetate	bromooctane	109-60-4	111-83-1	-4.48	Train	-4.36253	-4.90164
propyl acetate	carbondisulfide	109-60-4	75-15-0	-4.63	Train	-5.10745	-4.70628
propyl acetate	carbon tetrachloride	109-60-4	56-23-5	-5.03	Test	-4.70291	-4.64848
propyl acetate	chlorobenzene	109-60-4	108-90-7	-5.15	Test	-5.12969	-4.63667
propyl acetate	chlorohexane	109-60-4	544-10-5	-4.84	Train	-4.52038	-4.5393
propyl acetate	cyclohexane	109-60-4	110-82-7	-4.36	Test	-4.57661	-4.38723
propyl acetate	decalin	109-60-4	91-17-8	-4.05	Test	-4.52051	-4.17585
propyl acetate	decane	109-60-4	124-18-5	-4.02	Train	-4.2825	-4.57448
propyl acetate	ethylbenzene	109-60-4	100-41-4	-4.95	Train	-4.76217	-5.58605
propyl acetate	fluorooctane	109-60-4	463-11-6	-4.65	Test	-4.45898	-4.55682
propyl acetate	heptane	109-60-4	142-82-5	-4.09	Train	-4.26785	-4.00081
propyl acetate	hexadecane	109-60-4	544-76-3	-3.93	Train	-4.04704	-4.25799
propyl acetate	hexane	109-60-4	110-54-3	-4.1	Train	-4.32941	-4.56104
propyl acetate	isopropylbenzene	109-60-4	98-82-8	-4.78	Test	-4.6031	-4.57867
propyl acetate	nonane	109-60-4	111-84-2	-4.07	Train	-4.13873	-4.10846
propyl acetate	octane	109-60-4	111-65-9	-4.09	Test	-4.18555	-3.67566
propyl acetate	octanol	109-60-4	111-87-5	-4.55	Train	-5.38759	-4.51949
propyl acetate	pentadecane	109-60-4	629-62-9	-3.91	Test	-4.09205	-3.90716
propyl acetate	pentane	109-60-4	109-66-0	-4.21	Train	-4.41079	-4.24365
propyl acetate	perfluorobenzene	109-60-4	392-56-3	-5.06	Train	-4.76977	-4.8563
propyl acetate	secbutylbenzene	109-60-4	135-98-8	-4.62	Train	-4.54305	-5.37867
propyl acetate	tbutylbenzene	109-60-4	98-06-6	-4.72	Train	-4.52853	-5.771
propyl acetate	tetrachloroethene	109-60-4	127-18-4	-4.8	Train	-4.72737	-4.72015
propyl acetate	toluene	109-60-4	108-88-3	-5	Train	-4.79752	-5.44082
propyl acetate	xylene (mixed isomers)	109-60-4	1330-20-7	-4.87	Test	-4.70625	-4.33466
propylamine	1,2-Dichlorethane	107-10-8	107-06-2	-4.04	Train	-4.24534	-5.10577
propylamine	benzene	107-10-8	71-43-2	-3.68	Train	-3.72251	-3.76152
propylamine	bromobenzene	107-10-8	108-86-1	-3.57	Test	-3.94195	-3.1704
propylamine	butanol	107-10-8	71-36-3	-5.04	Train	-4.56434	-4.57516
propylamine	carbon tetrachloride	107-10-8	56-23-5	-3.59	Test	-3.53575	-3.27069
propylamine	chlorobenzene	107-10-8	108-90-7	-3.59	Train	-3.96253	-3.67788
propylamine	chloroform	107-10-8	67-66-3	-4.73	Test	-4.02045	-5.0128
propylamine	decane	107-10-8	124-18-5	-2.96	Train	-3.11534	-3.38012
propylamine	decanol	107-10-8	112-30-1	-4.59	Train	-3.99686	-5.24173
propylamine	diethylether	107-10-8	60-29-7	-3.65	Train	-3.97847	-3.22478
propylamine	ethylbenzene	107-10-8	100-41-4	-3.44	Train	-3.59501	-3.60179
propylamine	heptane	107-10-8	142-82-5	-3.03	Train	-3.1007	-3.02709
propylamine	heptanol	107-10-8	111-70-6	-4.8	Train	-4.28457	-4.95282
propylamine	hexadecane	107-10-8	544-76-3	-2.92	Train	-2.87988	-2.73475
propylamine	hexane	107-10-8	110-54-3	-3.13	Train	-3.16225	-3.02222
propylamine	hexanol	107-10-8	111-27-3	-4.83	Test	-4.34134	-4.73221
propylamine	iodobenzene	107-10-8	591-50-4	-3.54	Test	-3.85796	-4.13604
propylamine	nonane	107-10-8	111-84-2	-2.96	Train	-2.97157	-2.47902
propylamine	nonanol	107-10-8	143-08-8	-4.66	Train	-4.09013	-4.88173
propylamine	octane	107-10-8	111-65-9	-3	Train	-3.01839	-2.95981
propylamine	octanol	107-10-8	111-87-5	-4.77	Train	-4.22043	-4.27238
propylamine	1,2-dichlorobenzene	107-10-8	95-50-1	-3.44	Train	-4.0764	-3.7303
propylamine	pentane	107-10-8	109-66-0	-3.13	Train	-3.24364	-3.08413
propylamine	pentanol	107-10-8	71-41-0	-4.88	Train	-4.44281	-4.8673
propylamine	toluene	107-10-8	108-88-3	-3.51	Train	-3.63037	-3.44497
propylamine	tributylphosphate	107-10-8	126-73-8	-3.98	Train	-4.01896	-4.36943
propylamine	xylene (mixed isomers)	107-10-8	1330-20-7	-3.69	Train	-3.5391	-3.93936
propyne	hexadecane	74-99-7	544-76-3	-1.4	Train	-1.50335	-1.70664
p-xylene	p-xylene	106-42-3	106-42-3	-5.77438	Train	-5.53804	-6.02974
p-Xylene	acetonitrile	106-42-3	75-05-8	-5.27	Train	-6.51382	-5.44091
p-xylene	heptane	106-42-3	142-82-5	-5.52	Train	-5.18837	-5.36977
p-xylene	hexadecane	106-42-3	544-76-3	-5.24	Train	-4.96756	-5.47217
p-xylene	hexane	106-42-3	110-54-3	-5.01	Test	-5.24993	-4.13279
p-xylene	octanol	106-42-3	111-87-5	-5.19	Train	-6.30811	-6.69752
pyridine	pyridine	110-86-1	110-86-1	-5.51865	Train	-5.28582	-5.32198
pyridine	1,2-Dichlorethane	110-86-1	107-06-2	-5.53	Test	-4.75309	-5.41669
pyridine	4methyl2pentanone	110-86-1	108-10-1	-5.33	Train	-4.83706	-5.52416
pyridine	butylacetate	110-86-1	123-86-4	-5.31	Train	-4.62659	-5.01443
pyridine	carbon tetrachloride	110-86-1	56-23-5	-5.01	Test	-4.04351	-4.346
pyridine	cyclohexane	110-86-1	110-82-7	-4.3	Train	-3.91721	-4.23073
pyridine	dibutylether	110-86-1	142-96-1	-4.65	Train	-4.13443	-5.08627
pyridine	diethylether	110-86-1	60-29-7	-4.81	Train	-4.48622	-4.96094
pyridine	diisopropylether	110-86-1	108-20-3	-4.88	Test	-4.31557	-4.86368
pyridine	heptane	110-86-1	142-82-5	-4.28	Train	-3.60845	-5.05889
pyridine	hexadecane	110-86-1	544-76-3	-4.1	Test	-3.38763	-3.94388
pyridine	hexane	110-86-1	110-54-3	-3.81	Train	-3.67001	-3.51388
pyridine	isobutanol	110-86-1	78-83-1	-5.87	Train	-5.02444	-5.51605
pyridine	octanol	110-86-1	111-87-5	-5.34	Train	-4.72818	-5.20098
pyridine	pyridine	110-86-1	110-86-1	-5.47	Test	-5.1437	-5.64165
pyridine	toluene	110-86-1	108-88-3	-5.13	Train	-4.13812	-4.57882
pyrrole	pyrrole	109-97-7	109-97-7	-6.1544	Test	-5.86486	-5.39975
pyrrole	chloroform	109-97-7	67-66-3	-5.5	Train	-4.9756	-6.18681
pyrrole	cyclohexane	109-97-7	110-82-7	-3.77	Train	-4.3646	-4.62543
pyrrole	octanol	109-97-7	111-87-5	-5.28	Train	-5.17558	-6.14086
pyrrolidine	pyrrolidine	123-75-1	123-75-1	-4.84226	Train	-5.01589	-4.91289
quinoline	quinoline	91-22-5	91-22-5	-8.55641	Train	-7.98497	-8.56532
quinoline	cyclohexane	91-22-5	110-82-7	-7.38	Train	-6.70284	-7.41783
quinoline	octanol	91-22-5	111-87-5	-8.43	Train	-7.51381	-8.38807
secbutanol	2-butanol	78-92-2	78-92-2	-5.48	Train	-5.55091	-5.47999
s-trans-1,3-butadiene	hexadecane	106-99-0	544-76-3	-2.1	Train	-3.00777	-3.21946
styrene	styrene	100-42-5	100-42-5	-6.011	Train	-5.8487	-5.87027
t-butanol	t-butanol	75-65-0	75-65-0	-5.00479	Train	-5.60035	-5.76747
t-butanol	benzene	75-65-0	71-43-2	-3.7	Test	-4.75319	-3.35537
t-butanol	chloroform	75-65-0	67-66-3	-4.48	Train	-5.05113	-4.33126
t-butanol	diethylether	75-65-0	60-29-7	-4.8	Train	-5.00915	-5.16447
t-butanol	octanol	75-65-0	111-87-5	-4.78	Train	-5.25111	-5.4045
t-butyl methyl ether	octanol	1634-04-4	111-87-5	-3.49	Train	-4.17864	-4.27086
tbutylbenzene	tbutylbenzene	98-06-6	98-06-6	-6.43	Train	-6.33723	-5.26054
tetrachloroethene	octanol	127-18-4	111-87-5	-4.24	Test	-5.18623	-3.70651
tetrachloroethene	tetrachloroethene	127-18-4	127-18-4	-5.39	Train	-4.52601	-5.77938
tetrachloroethene	undecane	127-18-4	1120-21-4	-4.63	Train	-3.80664	-3.27273
tetrafluoromethane	octanol	75-73-0	111-87-5	1.5	Train	1.37645	0.333914
Tetrahydrofuran	DMSO	109-99-9	67-68-5	-3.64	Train	-3.67352	-3.97236
tetrahydrofuran	octanol	109-99-9	111-87-5	-3.93	Train	-3.16223	-3.81985
tetrahydrofuran	tetrahydrofuran	109-99-9	109-99-9	-4.25	Train	-3.36845	-4.491
tetrahydropyran	tetrahydropyran	142-68-7	142-68-7	-3.89819	Train	-3.74623	-3.85799
tetrahydropyran	octanol	142-68-7	111-87-5	-4.21	Train	-3.59497	-4.70631
tetrahydrothiophene	tetrahydrothiophene	110-01-0	110-01-0	-5.53538	Train	-5.30302	-4.90503
tetramethylsilane	tetramethylsilane	75-76-3	75-76-3	-3.10947	Train	-3.16032	-3.41925
tetramethylsilane	hexadecane	75-76-3	544-76-3	-2.92	Train	-3.01304	-3.17719
tetramethylurea	tetramethylurea	632-22-4	632-22-4	-7.13194	Train	-6.55776	-5.89916
thioanisole	carbon tetrachloride	100-68-5	56-23-5	-5.66	Train	-6.52901	-5.53023
thioanisole	chloroform	100-68-5	67-66-3	-5.98	Train	-7.0137	-7.01325
thioanisole	cyclohexane	100-68-5	110-82-7	-5.66	Test	-6.40271	-6.54587
thioanisole	decalin	100-68-5	91-17-8	-5.54	Train	-6.34661	-6.33448
thioanisole	octanol	100-68-5	111-87-5	-6.47	Test	-7.21369	-6.6939
thiophene	chloroform	110-02-1	67-66-3	-5.83	Test	-4.74051	-5.95018
thiophene	heptane	110-02-1	142-82-5	-4.09	Train	-3.82076	-4.02349
thiophene	hexadecane	110-02-1	544-76-3	-4.01	Train	-3.59995	-3.7416
thiophene	octanol	110-02-1	111-87-5	-3.89	Train	-4.9405	-5.27922
thiophenol	hexadecane	108-98-5	544-76-3	-5.61	Train	-4.64333	-4.92899
thiophenol	dichloromethane	108-98-5	75-09-2	-7.11	Train	-6.1402	-6.06825
thiophenol	octanol	108-98-5	111-87-5	-5.99	Train	-5.98388	-6.35985
toluene	toluene	108-88-3	108-88-3	-5.16492	Train	-4.94228	-5.36069
toluene	2methylpyridine	108-88-3	109-06-8	-5.06	Train	-5.7066	-6.02652
toluene	acetophenone	108-88-3	98-86-2	-4.9	Train	-5.84663	-5.91222
toluene	anisole	108-88-3	100-66-3	-4.95	Train	-5.30583	-6.10863
toluene	benzene	108-88-3	71-43-2	-5.32	Test	-5.01256	-5.47199
toluene	benzonitrile	108-88-3	100-47-0	-4.95	Train	-6.12115	-4.68688
toluene	bromobenzene	108-88-3	108-86-1	-5.13	Test	-5.232	-4.52274
toluene	bromoethane	108-88-3	106-93-4	-5.55	Test	-5.42586	-5.09008
toluene	butanone	108-88-3	78-93-3	-5.06	Test	-5.855	-5.35025
toluene	carbondisulfide	108-88-3	75-15-0	-5.39	Train	-5.23034	-5.21235
toluene	carbon tetrachloride	108-88-3	56-23-5	-5.12	Train	-4.82581	-5.43438
toluene	chlorobenzene	108-88-3	108-90-7	-5.18	Train	-5.25259	-5.51612
toluene	chloroform	108-88-3	67-66-3	-5.48	Train	-5.3105	-5.39047
toluene	cyclohexane	108-88-3	110-82-7	-4.9	Train	-4.69951	-4.59775
toluene	cyclohexanone	108-88-3	108-94-1	-5.05	Train	-5.94547	-5.01999
toluene	decalin	108-88-3	91-17-8	-4.37	Train	-4.6434	-4.80122
toluene	decane	108-88-3	124-18-5	-4.65	Train	-4.4054	-4.88708
toluene	dibutylether	108-88-3	142-96-1	-4.87	Train	-4.91673	-5.3387
toluene	diethylether	108-88-3	60-29-7	-5.23	Train	-5.26852	-5.74282
toluene	diisopropylether	108-88-3	108-20-3	-4.91	Train	-5.09787	-5.64918
toluene	dimethylpyridine	108-88-3	108-48-5	-5.03	Train	-5.45528	-5.89827
toluene	Diphenylether	108-88-3	101-84-8	-4.86	Train	-5.05681	-4.78925
toluene	ethoxybenzene	108-88-3	103-73-1	-4.99	Train	-4.98008	-5.23353
toluene	ethylacetate	108-88-3	141-78-6	-5.05	Train	-5.60061	-6.15805
toluene	fluorobenzene	108-88-3	462-06-6	-5.27	Train	-5.29431	-5.05919
toluene	heptane	108-88-3	142-82-5	-4.78	Train	-4.39075	-4.73756
toluene	hexadecane	108-88-3	544-76-3	-4.54	Train	-4.16993	-4.16244
toluene	hexadecyliodide	108-88-3	544-77-4	-4.41	Train	-3.46168	-4.17849
toluene	hexane	108-88-3	110-54-3	-4.84	Test	-4.45231	-4.56886
toluene	iodobenzene	108-88-3	591-50-4	-4.99	Train	-5.14801	-5.27756
toluene	isooctane	108-88-3	540-84-1	-4.68	Train	-4.08524	-4.26131
toluene	mcresol	108-88-3	108-39-4	-4.58	Test	-5.70223	-5.10689
toluene	dichloromethane	108-88-3	75-09-2	-5.53	Train	-5.66681	-5.69126
toluene	nonanol	108-88-3	143-08-8	-4.34	Train	-5.38018	-5.76995
toluene	octane	108-88-3	111-65-9	-4.82	Train	-4.30845	-5.12225
toluene	octanol	108-88-3	111-87-5	-4.55	Test	-5.51048	-4.05527
toluene	pyridine	108-88-3	110-86-1	-5.1	Train	-5.926	-6.10385
toluene	tetrahydrofuran	108-88-3	109-99-9	-5.5	Train	-5.7167	-5.60994
toluene	tetrahydrothiophenedioxide	108-88-3	126-33-0	-4.23	Test	-5.48869	-3.95182
toluene	toluene	108-88-3	108-88-3	-5.12	Train	-4.92042	-5.27385
toluene	triethylamine	108-88-3	121-44-8	-4.98	Train	-5.06372	-5.75209
toluene	undecane	108-88-3	1120-21-4	-4.81	Train	-4.1309	-5.55628
toluene	xylene (mixed isomers)	108-88-3	1330-20-7	-5.06	Train	-4.82915	-5.20218
t-pentanol	t-pentanol	75-85-4	75-85-4	-5.58796	Train	-6.17775	-6.28542
tr-1,2-dichloroethylene	tr-1,2-dichloroethylene	156-60-5	156-60-5	-3.88385	Train	-4.52952	-4.35965
trichloroethene	cyclohexane	79-01-6	110-82-7	-4.29	Train	-5.20285	-3.97918
trichloroethene	decane	79-01-6	124-18-5	-3.84	Train	-4.90874	-4.68285
trichloroethene	hexadecane	79-01-6	544-76-3	-4.08	Train	-4.67328	-4.7705
trichloroethene	undecane	79-01-6	1120-21-4	-3.87	Train	-4.63424	-5.25471
trichloroethene	trichloroethene	79-01-6	79-01-6	-4.96654	Train	-5.73959	-5.20318
triethanolmine	triethanolmine	102-71-6	102-71-6	-10.3274	Test	-10.3005	-9.91217
triethylphosphate	triethylphosphate	78-40-0	78-40-0	-7.48328	Test	-8.57334	-7.12067
triethylamine	triethylamine	121-44-8	121-44-8	-4.44	Train	-4.66712	-4.80856
triethyleneglycol	triethyleneglycol	112-27-6	112-27-6	-10.9297	Test	-9.72159	-9.67816
triethylphosphate	carbon tetrachloride	78-40-0	56-23-5	-7.51	Train	-6.52109	-5.96976
triethylphosphate	heptane	78-40-0	142-82-5	-6.67	Train	-6.08603	-5.43346
triethylphosphate	hexane	78-40-0	110-54-3	-6.78	Train	-6.14759	-6.56873
trimethyl phosphate	trimethyl phosphate	512-56-1	512-56-1	-7.18213	Test	-7.01794	-5.61511
trimethylamine	4methyl2pentanone	75-50-3	108-10-1	-2.86	Train	-3.30795	-3.72263
trimethylamine	benzene	75-50-3	71-43-2	-2.8	Train	-2.70114	-2.72687
trimethylamine	carbon tetrachloride	75-50-3	56-23-5	-3.09	Train	-2.51439	-3.51549
trimethylamine	chlorobenzene	75-50-3	108-90-7	-2.82	Train	-2.94117	-3.52657
trimethylamine	chloroform	75-50-3	67-66-3	-3.9	Train	-2.99908	-2.73487
trimethylamine	cyclohexane	75-50-3	110-82-7	-2.63	Train	-2.38809	-2.91283
trimethylamine	diethylether	75-50-3	60-29-7	-2.78	Test	-2.95711	-2.9977
trimethylamine	diisopropylether	75-50-3	108-20-3	-2.74	Train	-2.78645	-2.90406
trimethylamine	ethylbenzene	75-50-3	100-41-4	-2.64	Test	-2.57365	-2.56714
trimethylamine	hexadecane	75-50-3	544-76-3	-2.21	Train	-1.85852	-1.70011
trimethylamine	isobutanol	75-50-3	78-83-1	-3.9	Train	-3.49532	-3.5528
trimethylamine	octanol	75-50-3	111-87-5	-3.6	Train	-3.19907	-3.23773
trimethylamine	toluene	75-50-3	108-88-3	-2.71	Train	-2.609	-2.61557
trimethylamine	xylene (mixed isomers)	75-50-3	1330-20-7	-2.63	Test	-2.51773	-2.26749
trimethylbenzene	trimethylbenzene	95-63-6	526-73-8	-6.47	Train	-6.28415	-5.97538
trimethylphosphate	cyclohexane	512-56-1	110-82-7	-5.67	Test	-4.52864	-5.43663
tri-n-butylamine	tri-n-butylamine	102-82-9	102-82-9	-7.77726	Test	-9.00632	-9.2301
tripropylphosphate	benzene	513-08-6	71-43-2	-9.34	Train	-8.69077	-8.00782
tripropylphosphate	carbon tetrachloride	513-08-6	56-23-5	-8.6	Train	-8.50401	-7.80969
tripropylphosphate	cyclohexane	513-08-6	110-82-7	-7.71	Train	-8.37771	-7.54844
tripropylphosphate	heptane	513-08-6	142-82-5	-7.5	Train	-8.06895	-7.27339
tripropylphosphate	hexane	513-08-6	110-54-3	-7.24	Train	-8.13051	-8.0489
tripropylphosphate	octanol	513-08-6	111-87-5	-8.65	Train	-9.18869	-8.51869
valeronitrile	valeronitrile	110-59-8	110-59-8	-5.98471	Train	-5.41074	-5.1624
water	benzene	7732-18-5	71-43-2	-1.71	Test	-1.97801	-2.53289
water	chloroform	7732-18-5	67-66-3	-2.05	Test	-2.27595	-2.54089
water	ethylbenzene	7732-18-5	100-41-4	-1.51	Train	-1.85052	-2.37316
water	hexadecane	7732-18-5	544-76-3	-0.35	Train	-1.13539	-1.50613
water	isopropylbenzene	7732-18-5	98-82-8	-1.41	Train	-1.69145	-2.26495
water	dichloromethane	7732-18-5	75-09-2	-2.63	Test	-2.63226	-3.88307
water	toluene	7732-18-5	108-88-3	-1.69	Train	-1.88587	-2.4216
water	xylene (mixed isomers)	7732-18-5	1330-20-7	-1.56	Train	-1.7946	-2.26309

## Sheet: S2
Table S2: Solute name, CAS number and descriptors
Solute	Solute CAS	π (Bohr3)	eH (a.u.)	eL (a.u.)	μi (Debye)	q+	q-	Vmc (Å3)	E (a.u.)	S (cal/mol/K)
hydrogen sulfide	2148878	17.59	-0.26487	0.02656	1.6901	0.116175	-0.232338	53.631	-399.38	50.533
N-methylaniline	100-61-8	101.85	-0.19506	0.00281	2.347	0.2736	-0.586354	177.034	-326.785	83.065
2-ethylpyrazine	13925-00-3	91.53	-0.24954	-0.05133	0.7325	0.124037	-0.475769	173.378	-342.836	84.547
2-methylpropane	75-28-5	56	-0.31593	0.08735	0.0918	0.099527	-0.310605	129.461	-158.341	72.106
2-chloropropane	75-29-6	53.52	-0.29719	0.01632	3.1352	0.16765	-0.304338	126.068	-578.662	72.494
phosphorus oxychloride	10025-87-3	63.88	-0.33621	-0.09744	2.6128	0	-0.462419	138.369	-1797.23	80.34
ethylbenzene	100-41-4	103.11	-0.24062	-0.0005	0.4299	0.109775	-0.313986	184.837	-310.741	85.286
styrene	100-42-5	109.22	-0.22632	-0.03535	0.2288	0.11356	-0.272498	175.651	-309.531	82.168
benzylamine	100-46-9	97.68	-0.23445	-0.00104	1.8606	0.257093	-0.633371	178.289	-326.783	84.849
benzonitrile	100-47-0	93.8	-0.26554	-0.05123	4.6313	0.130075	-0.533697	163.096	-324.408	78.509
benzylalcohol	100-51-6	92.14	-0.24313	-0.00423	1.7524	0.325045	-0.565143	170.947	-346.659	83.22
benzaldehyde	100-52-7	94.17	-0.26193	-0.06632	4.259	0.11838	-0.465879	163.349	-345.479	79.549
anisole	100-66-3	93.79	-0.22133	-0.00333	1.7183	0.133173	-0.533826	171.985	-346.654	81.841
thioanisole	100-68-5	115.52	-0.21364	-0.00648	1.9153	0.162805	-0.478927	187.556	-669.637	87.673
m-hydroxybenzaldehyde	100-83-4	100.72	-0.23442	-0.06612	5.3986	0.347149	-0.573209	176.736	-420.698	85.089
triethanolmine	102-71-6	104.59	-0.19558	0.0674	4.6987	0.338369	-0.606353	228.486	-517.853	105.853
tri-n-butylamine	102-82-9	177.99	-0.20717	0.0906	0.8435	0.10448	-0.456249	353.492	-527.961	138.937
dibenzyl ether	103-50-4	184.12	-0.24375	-0.01328	1.4778	0.10842	-0.513791	305.976	-616.916	120.312
ethyl phenyl ether	103-73-1	108.55	-0.22062	-0.00303	1.7799	0.122252	-0.541491	197.805	-385.948	89.39
Butylbenzene	104-51-8	131.84	-0.23975	-0.00046	0.4994	0.104795	-0.325344	237.723	-389.317	100.124
cinnamaldehyde	104-55-2	143.37	-0.23981	-0.07857	5.8984	0.121248	-0.49285	205.63	-422.853	92.131
ethyl propanoate	105-37-3	72.77	-0.27111	0.00994	2.5325	0.144132	-0.525144	172.658	-346.893	92.595
diethyl malonate	105-53-3	104.21	-0.28196	-0.0005	3.7428	0.179254	-0.508455	242.36	-574.731	118.536
diethyl carbonate	105-58-8	76.77	-0.29025	0.0372	0.7486	0.127917	-0.533352	185.64	-422.114	97.066
2,4-dimethylphenol	105-67-9	110.59	-0.21183	-0.00198	1.2675	0.339599	-0.585427	197.645	-385.964	84.756
p-xylene	106-42-3	105.04	-0.23044	0.00053	0.0002	0.129039	-0.383742	186.258	-310.746	91.039
4-methylphenol (p-cresol)	106-44-5	94.59	-0.21565	-0.00289	1.7043	0.341064	-0.583025	172.768	-346.672	85.791
1,4-dichlorobenzene	106-46-7	102.81	-0.24877	-0.02522	0	0.138298	-0.099084	179.14	-1151.37	83.509
4-methylaniline	106-49-0	102.72	-0.18774	0.00516	2.1962	0.283216	-0.696689	178.552	-326.797	85.824
methyl hexanoate	106-70-7	100.46	-0.27592	0.01118	2.0873	0.142417	-0.521593	224.044	-425.465	107.921
n-butane	106-97-8	55.79	-0.31685	0.09603	0	0.103348	-0.324407	129.7	-158.34	73.095
1-butene	106-98-9	53.62	-0.25349	0.02177	0.4696	0.110742	-0.322265	121.229	-157.125	70.959
s-trans-1,3-butadiene	106-99-0	57.82	-0.23248	-0.0263	0	0.113267	-0.271717	112.872	-155.918	67.4
1-butyne	107-00-6	46.92	-0.26544	0.05139	0.9433	0.175467	-0.460447	113.864	-155.894	69.016
1-propanethiol	107-03-9	62.01	-0.24168	0.02789	2.3547	0.149524	-0.328148	132.911	-517.241	75.697
3-chloropropene	107-05-1	51.97	-0.27269	-0.02063	2.9249	0.183752	-0.312127	118.234	-577.441	71.197
1,2-dichloroethane	107-06-2	49.23	-0.303	0.00333	3.8477	0.194645	-0.271587	122.758	-998.97	73.1
2-chloroethanol	107-07-3	42.76	-0.2798	0.01711	1.9044	0.33125	-0.559131	113.198	-614.576	71.721
propylamine	107-10-8	50.4	-0.23501	0.08867	1.7557	0.248271	-0.639201	123.194	-174.384	72.368
propionitrile	107-12-0	41.2	-0.32662	0.03042	4.7894	0.1759	-0.531868	106.865	-172.009	67.92
arylonitrile	107-13-1	41.39	-0.28653	-0.0523	4.8695	0.171511	-0.522903	98.564	-170.792	65.124
1,2-diaminoethane	107-15-3	44.77	-0.23437	0.08847	2.5866	0.254082	-0.6457	116.2	-190.425	70.581
allyl alcohol	107-18-6	43.38	-0.26044	0.00821	1.8457	0.322215	-0.569676	108.787	-193.043	69.727
1,2-ethanediol	107-21-1	35.78	-0.26191	0.07266	2.9317	0.332018	-0.575835	103.397	-230.18	69.313
methyl formate	107-31-3	31.89	-0.28838	0.00195	2.2553	0.141898	-0.472889	95.386	-229.011	67.969
2-methylpentane	107-83-5	83.78	-0.3038	0.08869	0.095	0.103331	-0.325019	179.42	-236.916	87.272
2-pentanone	107-87-9	68.96	-0.24795	-0.01224	3.4769	0.144386	-0.490804	159.608	-271.663	82.251
butanoic acid	107-92-6	58.74	-0.27868	0.00926	1.8974	0.34098	-0.506401	146.395	-307.613	83.377
1-nitropropane	108-03-2	57.08	-0.29719	-0.07121	4.4376	0.118912	-0.405109	139.928	-323.551	76.985
2,4-dimethylpentane	108-08-7	97.66	-0.29281	0.07616	0.1457	0.105311	-0.318127	202.981	-276.199	93.289
4-methyl-2-pentanone	108-10-1	83.04	-0.24751	-0.01279	3.4032	0.149217	-0.492864	183.721	-310.951	91.782
isopropyl ether	108-20-3	87.87	-0.24568	0.08313	1.5771	0.108363	-0.527628	193.728	-312.126	92.692
acetic anhydride	108-24-7	59.59	-0.27838	-0.03295	5.0574	0.165411	-0.470171	150.894	-381.648	89.686
m-xylene	108-38-3	104.64	-0.2348	0.00108	0.4604	0.130049	-0.38378	186.245	-310.747	90.741
m-cresol	108-39-4	94.31	-0.22074	-0.00138	1.3438	0.341562	-0.581437	172.697	-346.673	84.938
3-methylaniline	108-44-1	101.6	-0.20153	0.00376	1.9365	0.276295	-0.677232	178.581	-326.799	85.777
2,4-dimethylpyridine	108-47-4	98.21	-0.251	-0.02066	3.0406	0.140423	-0.520217	179.732	-326.799	91.395
2,6-dimethylpyridine	108-48-5	98.41	-0.24322	-0.01616	2.1766	0.130607	-0.549209	179.743	-326.8	78.924
2,4,6-trimethylpyridine	108-75-8	114.59	-0.24334	-0.01926	2.5774	0.140257	-0.562287	203.947	-366.095	99.502
bromobenzene	108-86-1	102.49	-0.25511	-0.02559	1.716	0.127957	-0.202676	163.903	-2805.76	79.183
methylcyclohexane	108-87-2	94.73	-0.28719	0.08878	0.0819	0.099689	-0.319965	184.427	-275.017	81.384
toluene	108-88-3	88.37	-0.2402	-0.00051	0.4623	0.13112	-0.383554	160.266	-271.453	79.884
gama-Picoline (4-methylpyridine)	108-89-4	81.85	-0.25932	-0.02206	3.4864	0.143351	-0.477625	154.048	-287.503	79.611
chlorobenzene	108-90-7	86.88	-0.24992	-0.01385	2.4975	0.124707	-0.10072	156.74	-691.765	76.295
c-hexanol	108-93-0	83.97	-0.2612	0.08623	1.9576	0.319593	-0.58969	173.552	-310.941	80.379
cyclohexanone	108-94-1	79.85	-0.24123	-0.01639	3.9144	0.133745	-0.50291	165.304	-309.76	79.582
phenol	108-95-2	78.15	-0.22359	-0.00377	1.7358	0.342222	-0.579149	146.917	-307.38	74.532
thiophenol	108-98-5	98.4	-0.2232	-0.00794	1.6569	0.112577	-0.111304	162.397	-630.351	79.22
3-methylpyridine	108-99-6	82.12	-0.25369	-0.0252	3.1955	0.134798	-0.473278	153.677	-287.502	78.366
2-methylpyridine	109-06-8	82.16	-0.25265	-0.02131	2.5633	0.132298	-0.509699	153.843	-287.504	73.774
2-methylpyrazine	109-08-0	76.87	-0.25031	-0.04872	0.7384	0.141246	-0.474269	147.567	-303.548	73.517
pentanoic acid	109-52-4	72.63	-0.27854	0.00935	1.9428	0.340927	-0.506786	171.889	-346.901	91.047
propyl acetate	109-60-4	72.95	-0.27486	0.01077	2.5314	0.153816	-0.516277	172.545	-346.894	93.607
n-pentane	109-66-0	69.67	-0.31053	0.09483	0.0555	0.10329	-0.324613	155.261	-197.628	80.751
1-pentene	109-67-1	67.79	-0.25268	0.0221	0.4921	0.106086	-0.324245	147.478	-196.414	78.606
1-chlorobutane	109-69-3	67.02	-0.29696	0.02032	3.0546	0.168866	-0.324125	152.4	-617.946	80.979
butylamine	109-73-9	64.17	-0.23566	0.08978	1.6847	0.250475	-0.645954	148.503	-213.671	80.243
butyronitrile	109-74-0	55.26	-0.32379	0.03117	4.9162	0.171544	-0.537779	132.424	-211.297	75.525
2-methoxyethanol	109-86-4	49.48	-0.25793	0.07575	2.4955	0.328906	-0.570342	130.238	-269.454	78.952
diethylamine	109-89-7	65.17	-0.22062	0.09089	1.2291	0.242845	-0.527542	149.007	-213.666	79.798
ethyl formate	109-94-4	45.78	-0.28574	0.00345	2.5445	0.130396	-0.476849	121.576	-268.305	75.563
pyrrole	109-97-7	52.24	-0.20883	0.04449	2.4507	0.293428	-0.478249	112.756	-210.1	65.803
tetrahydrofuran	109-99-9	54.92	-0.2425	0.09181	2.2101	0.114274	-0.543472	124.878	-232.347	72.059
furan	110-00-9	46.77	-0.22867	0.01436	0.7785	0.132237	-0.419178	108.02	-229.96	65.098
tetrahydrothiophene	110-01-0	73.14	-0.22078	0.03147	2.9017	0.142517	-0.321483	139.61	-555.338	73.113
thiophene	110-02-1	66.28	-0.23661	-0.01186	0.7954	0.150408	-0.309626	120.646	-552.946	67.906
2-heptanone	110-43-0	96.88	-0.24763	-0.01208	3.469	0.146291	-0.491543	211.063	-350.239	102.742
n-hexane	110-54-3	83.66	-0.30411	0.09399	0.0001	0.103247	-0.32437	181.032	-236.916	88.333
pentylamine	110-58-7	78.12	-0.23559	0.08968	1.6526	0.250397	-0.645839	174.165	-252.959	87.836
valeronitrile	110-59-8	69.34	-0.32068	0.03171	4.995	0.171676	-0.539107	158.296	-250.585	83.014
pentanal	110-62-3	69.56	-0.25559	-0.02087	3.2586	0.138671	-0.444345	159.601	-271.65	85.019
1,2-dimethoxyethane	110-71-4	63.68	-0.25519	0.08318	0.0021	0.119942	-0.509996	156.648	-308.732	87.11
2-ethoxyethanol	110-80-5	63.51	-0.25629	0.07644	2.5004	0.328706	-0.570655	156.786	-308.748	86.848
diethyl disulfide	110-81-6	103.81	-0.24013	-0.02567	3.1067	0.15637	-0.335955	187.926	-954.721	94.923
cyclohexane	110-82-7	80.24	-0.29122	0.08888	0	0.089317	-0.176149	159.302	-235.727	74.616
piperazine	110-85-0	70.4	-0.22117	0.08364	0.0001	0.252575	-0.531824	146.994	-267.802	73.148
pyridine	110-86-1	66	-0.26066	-0.02618	2.8582	0.123165	-0.469943	128.057	-248.208	68.647
piperidine	110-89-4	75.34	-0.21992	0.08642	1.1741	0.24936	-0.525369	153.431	-251.765	73.931
morpholine	110-91-8	64.96	-0.22581	0.0875	1.9041	0.257911	-0.531649	141.899	-287.677	72.952
2-octanone	111-13-7	110.82	-0.24761	-0.01214	3.5224	0.144088	-0.491255	237.232	-389.527	105.112
n-heptanoic acid	111-14-8	100.22	-0.27731	0.00894	5.2565	0.352646	-0.501211	222.98	-425.473	100.723
1-hexanol	111-27-3	87.13	-0.26346	0.08591	2.0326	0.321928	-0.579629	194.316	-312.123	94.787
di-n-propyl ether	111-43-3	87.65	-0.25206	0.09393	1.3024	0.109909	-0.528097	195.582	-312.119	95.349
di(2-chloroethyl)ether	111-44-4	81.42	-0.26983	0.01761	4.4434	0.179993	-0.497313	188.296	-1152.75	95.159
dipropyl sulfide	111-47-7	106.81	-0.22221	0.03415	2.2395	0.136016	-0.326863	210.7	-635.103	100.807
ethyloctadecanoate	111-61-5	282.58	-0.2736	0.01231	2.2835	0.12376	-0.525485	561.345	-936.216	206.667
n-octane	111-65-9	111.59	-0.29567	0.09256	0	0.103213	-0.324363	232.639	-315.493	103.593
1-heptanol	111-70-6	101.12	-0.26324	0.0859	2.0384	0.321939	-0.579684	220.294	-351.412	102.275
1-octanol	111-87-5	115.08	-0.26309	0.08586	2.0348	0.321933	-0.579714	246.119	-390.7	109.917
di-n-butylamine	111-92-2	120.82	-0.22014	0.09042	1.2266	0.243082	-0.553029	252.073	-370.818	110.349
bis(methoxyethyl) ether	111-96-6	95.37	-0.25546	0.07477	1.5835	0.120325	-0.526527	222.943	-462.508	109.764
triethyleneglycol	112-27-6	98.64	-0.25836	0.06696	3.1065	0.329372	-0.569837	235.33	-537.729	120.199
1-decanol	112-30-1	143.1	-0.2649	0.08733	1.8628	0.325606	-0.580633	298.181	-469.275	125.744
n-dodecanol	112-53-8	171.25	-0.26487	0.08729	1.8652	0.325619	-0.580922	350.117	-547.851	140.512
propene	115-07-1	39.39	-0.2533	0.02414	0.482	0.122345	-0.35717	95.636	-117.838	63.212
dimethyl ether	115-10-6	32.17	-0.25505	0.09403	1.5726	0.118176	-0.495003	91.426	-154.956	64.489
2-methylpropene	115-11-7	54.16	-0.24282	0.0276	0.7244	0.118819	-0.368504	121.091	-157.132	70.586
2,6-dichlorobenzonitrile	1194-65-6	124.98	-0.26743	-0.07085	7.3471	0.150595	-0.517322	204.762	-1243.61	92.51
anthracene	120-12-7	221.47	-0.19727	-0.06526	0	0.105005	-0.221306	263.054	-539.357	95.055
ethylparaben	120-47-8	283.76	-0.26436	-0.22199	4.8034	0	-0.433167	205.941	-568.036	103.877
1,2,4-trichlorobenzene	120-82-1	118.71	-0.2539	-0.03424	1.9078	0.154675	-0.096831	199.84	-1610.97	90.344
c-pentanone (cyclopentanone)	120-92-3	64.63	-0.24204	-0.01817	3.6315	0.145501	-0.503489	140.57	-270.469	74.867
triethylamine	121-44-8	94.04	-0.20893	0.09281	0.8477	0.1092	-0.425797	197.111	-292.233	93.339
N,N-dimethylaniline	121-69-7	118.49	-0.18931	0.00388	2.5262	0.125986	-0.507419	200.518	-366.062	90.904
p-hydroxybenzaldehyde	123-08-0	104.24	-0.23743	-0.05753	6.0395	0.351421	-0.558446	176.153	-420.701	84.677
p-methoxybenzaldehyde	123-11-5	121.21	-0.23411	-0.05804	5.1613	0.141457	-0.519833	201.704	-459.976	92.111
4-heptanone	123-19-3	96.43	-0.24605	-0.01078	3.349	0.131347	-0.498595	210.271	-350.239	96.643
propionaldehyde (propanal)	123-38-6	41.81	-0.25647	-0.02084	3.23	0.141691	-0.44275	107.769	-193.074	69.929
i-pentanol	123-51-3	73.39	-0.26465	0.08542	1.8869	0.325453	-0.581626	167.03	-272.834	86.408
acetylacetone	123-54-6	70.49	-0.25318	-0.04518	1.9359	0.156277	-0.468521	163.231	-345.692	91.557
butyraldehyde (butanal)	123-72-8	55.62	-0.2558	-0.021	3.2064	0.138401	-0.443874	134.038	-232.362	77.312
pyrrolidine	123-75-1	59.48	-0.22834	0.0787	1.6681	0.248065	-0.519302	130.944	-212.47	72.796
butyl acetate	123-86-4	86.88	-0.27463	0.01083	2.5163	0.153796	-0.516496	198.351	-386.182	101.349
1,4-dioxane	123-91-1	59.72	-0.23853	0.09531	0	0.115211	-0.508601	136.687	-307.551	72.733
octanal	124-13-0	111.47	-0.25518	-0.02079	3.2092	0.138607	-0.444544	237.123	-389.515	108.01
dimethylamine	124-40-3	36.97	-0.22087	0.09004	1.2762	0.253948	-0.518205	97.363	-135.085	64.737
tetrachloroethene	127-18-4	78.91	-0.26027	-0.03802	0.0002	0	-0.16898	156.14	-1916.94	84.268
N,N-dimethylacetamide	127-19-5	65.91	-0.23703	0.02928	4.8728	0.144818	-0.576148	149.833	-287.72	85.984
2,2'-dichlorobiphenyl	13029-08-8	182.8	-0.24965	-0.02553	3.2834	0.127823	-0.11544	283.695	-1382.35	108.824
dimethyl phthalate	131-11-3	145.42	-0.26158	-0.05972	7.4235	0.145246	-0.53055	266.331	-687.827	116.963
ethyl acetate	141-78-6	59.12	-0.27473	0.01089	2.4621	0.153682	-0.516621	146.706	-307.606	85.812
hexanoic acid	142-62-1	86.58	-0.2784	0.00935	1.8902	0.340882	-0.507058	197.828	-386.189	98.756
tetrahydropyran	142-68-7	69.74	-0.24675	0.09281	1.8048	0.103212	-0.511728	148.251	-271.641	73.684
n-heptane	142-82-5	97.59	-0.29936	0.09317	0.0555	0.103216	-0.324358	206.902	-276.204	96.001
dipropylamine	142-84-7	92.84	-0.22031	0.09126	1.1892	0.243199	-0.549699	200.524	-292.242	95.221
dibutylether	142-96-1	115.56	-0.25177	0.09184	1.3916	0.105872	-0.531263	246.517	-390.695	110.957
1-nonanol	143-08-8	129.07	-0.263	0.08588	2.0395	0.321933	-0.579701	271.984	-429.988	117.443
dimethylcyanamide	1467-79-4	51.47	-0.24231	0.03266	6.0252	0.147656	-0.545725	125.753	-227.326	76.014
1,2-dichloroethene	156-59-2	48.76	-0.2611	-0.01275	2.6197	0.191888	-0.18099	113.281	-997.751	70.596
tr-1,2-dichloroethylene	156-60-5	50.58	-0.25905	-0.01625	0	0.190168	-0.17209	114.364	-997.75	69.432
pentamethylene sulfide	1613-51-0	88.28	-0.22234	0.03983	2.5714	0.141022	-0.32573	163.445	-594.628	77.236
t-butyl methyl ether	1634-04-4	73.5	-0.24894	0.0823	1.6098	0.113173	-0.524189	165.804	-272.83	85.604
2,3-dichlorobiphenyl	16605-91-7	183.62	-0.25366	-0.02655	3.745	0.134843	-0.109751	283.356	-1382.34	103.41
naproxen	22204-53-1	216.76	-0.2091	-0.0469	5.979	0.344292	-0.53585	326.978	-767.39	127.877
3-ethyl-2-methoxypyrazine	25680-58-4	113.95	-0.23789	-0.04244	1.8371	0.13314	-0.51185	211.086	-457.341	96.183
cyclopentane	287-92-3	64.93	-0.3076	0.08659	0.0079	0.098219	-0.190865	136.606	-196.431	75.775
dimethyl 2,4,5-trichlorophenyl thiophosphate	299-84-3	207.91	-0.25333	-0.04225	4.0188	0.16386	-0.571789	350.169	-2655.39	144.676
hydrazine	302-01-2	17.8	-0.24596	0.08375	2.6625	0.268068	-0.525232	64.813	-111.823	56.537
perfluoro-n-heptane	335-57-9	92.31	-0.33757	-0.00678	0.1262	0	-0.274439	307.57	-1864.06	145.201
diethyl sulfide	352-93-2	77.72	-0.22261	0.03303	2.299	0.139771	-0.332634	159.02	-556.527	85.257
fluoroethane	353-36-6	27.98	-0.3227	0.10855	2.0578	0.122667	-0.351964	85.358	-178.998	62.995
perfluoro(methylcyclohexane)	355-02-2	88.09	-0.35435	-0.02166	0.1763	0	-0.296663	271.338	-1664.38	134.13
perfluoro-n-hexane	355-42-0	79.09	-0.34189	0.00171	0	0	-0.273479	270.221	-1626.29	130.257
1,1,1-trifluoropropan-2-ol	374-01-6	43.93	-0.29167	0.07687	1.9877	0.334556	-0.557686	136.187	-492.007	83.234
hexafluorobenzene	392-56-3	74.49	-0.26272	-0.0221	0.0001	0	-0.269972	175.035	-827.548	96.86
fluorobenzene	462-06-6	72.09	-0.24646	-0.01109	1.6913	0.116642	-0.31009	140.839	-331.401	73.493
1-fluorooctane	463-11-6	110.96	-0.29773	0.09044	2.1958	0.107454	-0.350445	240.764	-414.726	108.655
2,2-dimethylpropane	463-82-1	70.19	-0.31357	0.07733	0.0005	0.096906	-0.302112	153.459	-197.631	77.781
1,8-cineole	470-82-6	135.72	-0.23343	0.07013	1.8814	0.107085	-0.576718	252.283	-466.899	98.188
formaldehyde	50-00-0	15.13	-0.26744	-0.04067	2.6438	0.105226	-0.391498	56.591	-114.481	53.623
5-nonanone	502-56-7	124.4	-0.2457	-0.01056	3.4441	0.13443	-0.500047	262.255	-428.816	118.571
acetylsalicylic acid	50-78-2	129.27	-0.26227	-0.05674	10.5397	0.352129	-0.500425	242.222	-648.551	109.046
trimethyl phosphate	512-56-1	74.41	-0.29566	0.0484	5.0488	0.145894	-0.600369	188.557	-761.936	104.128
tripropylphosphate	513-08-6	158.23	-0.294	0.05169	4.7804	0.130076	-0.603907	344.262	-997.683	150.929
ethyl trichloroacetate	515-84-4	97.52	-0.3024	-0.05399	3.6313	0.146319	-0.452603	212.218	-1686.38	104.44
1,2,3-Trimethylbenzene (Hemellitene)	526-73-8	120.36	-0.2316	0.00272	0.9465	0.128404	-0.390207	207.495	-350.035	88.248
2,3-butanediol	5341-95-7	62.88	-0.26386	0.07088	3.7987	0.324372	-0.581671	153.853	-308.763	84.255
1-chloropropane	540-54-5	52.58	-0.29735	0.02227	2.9205	0.169236	-0.322494	126.086	-578.658	73.047
2,2,4-trimethylpentane	540-84-1	112.23	-0.29261	0.074	0.1137	0.106112	-0.317385	226.44	-315.487	98.748
m-dichlorobenzene	541-73-1	102.51	-0.25464	-0.02506	2.3416	0.14539	-0.100083	177.811	-1151.37	83.479
di-n-butyl sulfide	544-40-1	135.33	-0.22193	0.03496	2.3338	0.136098	-0.326804	263.018	-713.679	115.693
benzamide	55-21-0	99.89	-0.25737	-0.04023	4.817	0.298436	-0.624053	180.665	-400.849	83.927
methyl 3-methyl-4-thiomethoxyphenyl thiophosphate	55-38-9	220.69	-0.21462	-0.01347	2.3786	0.164239	-0.579284	363.137	-1753.36	147.891
methyl propanoate	554-12-1	58.65	-0.27636	0.01114	2.1583	0.145673	-0.518961	145.927	-307.601	85.104
methyl propyl ether	557-17-5	59.77	-0.25351	0.0953	1.4405	0.116268	-0.510845	142.977	-233.537	79.958
carbon tetrachloride	56-23-5	62.99	-0.32386	-0.076	0.0007	0	-0.35438	140.391	-1878.85	79.152
methyl i-propyl ketone	563-80-4	69.03	-0.24556	-0.01499	3.4502	0.146685	-0.501561	159.107	-271.661	79.91
2,5-dimethylpyridine	589-93-5	98.79	-0.24343	-0.02049	2.824	0.132239	-0.512937	179.64	-326.798	83.209
iodobenzene	591-50-4	101.67	-0.24969	-0.0468	2.3948	0.261111	-0.309865	177.653	-242.935	81.198
2-hexanone	591-78-6	82.9	-0.24773	-0.01206	3.5211	0.146605	-0.49132	185.401	-310.951	94.642
1-hexene	592-41-6	81.89	-0.25231	0.02229	0.5178	0.106173	-0.32496	173.013	-235.702	86.122
methyl isopropyl ether	598-53-8	59.72	-0.25096	0.08865	1.5586	0.115257	-0.510057	142.282	-233.541	79.377
diethyl ether	60-29-7	60.12	-0.25195	0.09483	1.4036	0.11486	-0.511461	143.376	-233.543	79.943
methylhydrazine	60-34-4	32.13	-0.22754	0.08143	2.5785	0.265792	-0.507068	91.109	-151.106	64.172
acetamide	60-35-5	36.19	-0.25167	0.0305	4.7206	0.297296	-0.594614	100.218	-209.16	72.064
N,N-diethylformamide	617-84-5	79.7	-0.24176	0.02589	5.1035	0.128369	-0.554083	176.794	-327.006	90.799
methyl butanoate	623-42-7	72.54	-0.27624	0.01111	2.1013	0.142306	-0.520634	172.673	-346.889	92.972
diethyl sulfite	623-81-4	89.46	-0.27614	0.00474	4.3844	0.13215	-0.599563	197.018	-782.128	104.083
methyl pentanoate	624-24-8	86.48	-0.27605	0.01115	2.1408	0.14236	-0.521341	197.811	-386.177	100.388
dimethyl disulfide	624-92-0	72.74	-0.24218	-0.02781	2.9083	0.163026	-0.463225	137.111	-876.143	79.897
aniline	62-53-3	85.4	-0.20344	0.0017	2.1293	0.277311	-0.675176	152.801	-287.506	75.316
di-i-propyl sulfide	625-80-9	108.36	-0.22255	0.03942	2.4078	0.136949	-0.321622	208.313	-635.105	97.815
3-bromopyridine	626-55-1	95.84	-0.26501	-0.04763	2.7043	0.14169	-0.324483	157.846	-2821.81	78.799
1-nitrobutane	627-05-4	70.98	-0.29613	-0.07108	4.5087	0.175683	-0.405102	166.5	-362.839	90.094
1-pentyne	627-19-0	61.05	-0.26543	0.05241	1.0153	0.176819	-0.495557	139.45	-195.183	76.547
2-pentene	627-20-3	68.71	-0.23816	0.03033	0.2765	0.119572	-0.358217	146.023	-196.417	79.573
2,2-dichloroethenyl dimethyl phosphate	62-73-7	114.12	-0.24842	-0.00743	4.2206	0.177894	-0.583807	249.459	-1719.21	122.794
pentyl acetate	628-63-7	100.87	-0.27456	0.01084	2.5732	0.153775	-0.516636	224.157	-425.47	108.971
tetramethylurea	632-22-4	89.1	-0.21846	0.05372	5.1342	0.141477	-0.615697	190.889	-382.326	92.311
ethanol	64-17-5	31.97	-0.26695	0.08527	1.9772	0.322057	-0.571846	91.038	-154.971	64.334
formic acid	64-18-6	19.06	-0.28903	-0.00018	4.7105	0.3606	-0.454905	68.837	-189.731	59.4
acetic acid	64-19-7	31.68	-0.27918	0.00792	2.0254	0.34239	-0.499159	94.592	-229.036	68.879
methanol	67-56-1	18.41	-0.2678	0.08538	1.9447	0.328409	-0.570734	65.029	-115.678	56.877
2-propanol	67-63-0	45.67	-0.26559	0.08175	1.9771	0.31578	-0.574978	116.238	-194.265	71.118
acetone	67-64-1	41.69	-0.24938	-0.01353	3.5943	0.144433	-0.484762	108.334	-193.087	68.104
chloroform	67-66-3	48.91	-0.3154	-0.04775	1.5949	0.27354	-0.350895	119.05	-1419.26	72.983
hexamethyl phosphoramide	680-31-9	136.35	-0.21463	0.0677	5.2367	0.134864	-0.641134	275.589	-820.118	122.418
dimethylformamide	68-12-2	52.59	-0.24358	0.02692	4.9725	0.141015	-0.547132	125.661	-248.427	76.31
1-hexyne	693-02-7	75.13	-0.26488	0.0527	1.0727	0.176837	-0.501506	165.296	-234.471	84.254
1-propanol	71-23-8	45.49	-0.26513	0.08626	2.011	0.322113	-0.578343	116.903	-194.259	71.962
1-butanol	71-36-3	59.29	-0.26428	0.08618	2.0218	0.321959	-0.579494	142.705	-233.547	79.621
1-pentanol	71-41-0	73.21	-0.26383	0.08605	2.034	0.321943	-0.579515	168.662	-272.835	87.093
benzene	71-43-2	72.2	-0.25127	-0.00175	0	0.101002	-0.101007	134.4	-232.16	69.026
1,1,1-trichloroethane	71-55-6	64.72	-0.3111	-0.04763	2.4759	0.167714	-0.289235	143.853	-1458.56	78.698
methane	74-82-8	14.77	-0.3881	0.1192	0	0.120675	-0.482659	51.507	-40.4794	49.417
ethane	74-84-0	28.14	-0.3388	0.10584	0	0.106881	-0.320628	77.824	-79.7642	57.962
ethene	74-85-1	24.57	-0.27029	0.01478	0	0.111734	-0.223467	69.382	-78.5439	55.083
ethyne	74-86-2	17.47	-0.28781	0.04648	0	0.178912	-0.178912	61.788	-77.3061	47.96
methylamine	74-89-5	22.8	-0.2361	0.09031	1.7117	0.253245	-0.64079	71.263	-95.8039	57.354
n-propane	74-98-6	41.93	-0.32289	0.09719	0.0565	0.103084	-0.317048	103.645	-119.052	65.515
propyne	74-99-7	32.81	-0.26674	0.05616	0.9267	0.174779	-0.437281	87.536	-116.607	61.261
chloroethane	75-00-3	38.69	-0.29896	0.02096	2.883	0.172796	-0.315748	100.37	-539.37	65.766
ethylamine	75-04-7	36.73	-0.23645	0.08734	1.7024	0.248029	-0.632408	97.039	-135.096	64.781
acetonitrile	75-05-8	27.59	-0.33131	0.03497	4.6569	0.186042	-0.525503	80.647	-132.722	60.022
acetaldehyde	75-07-0	28.62	-0.258	-0.02308	3.271	0.150964	-0.438594	82.516	-153.785	62.634
ethanethiol	75-08-1	47.18	-0.2414	0.02598	2.267	0.150572	-0.329411	106.931	-477.952	68.431
dichloromethane	75-09-2	35.67	-0.30958	-0.01519	2.2904	0.229575	-0.358615	97.33	-959.674	66.045
diiodomethane	75-11-6	60.22	-0.26783	-0.08758	1.6948	0.342822	-0.889882	137.616	-62.1016	75.714
formamide	75-12-7	23.53	-0.25994	0.0258	4.7706	0.304348	-0.561155	74.926	-169.862	61.282
carbon disulfide	75-15-0	59.83	-0.27575	-0.07279	0	0	-0.043607	90.21	-834.482	56.783
dimethyl sulfide	75-18-3	48.11	-0.22469	0.04053	2.2096	0.151983	-0.457433	107.845	-477.95	69.222
cyclopropane	75-19-4	36.84	-0.28909	0.10716	0.0007	0.116034	-0.232103	91.489	-117.824	60.215
1,1-difluoroethane	75-37-6	27.61	-0.33013	0.11635	2.345	0.137073	-0.376046	91.869	-278.25	67.175
trimethylamine	75-50-3	51.57	-0.21221	0.08503	0.797	0.109986	-0.415739	122.175	-174.368	70.771
nitromethane	75-52-5	29.98	-0.2989	-0.07375	4.1419	0.194181	-0.399208	88.839	-244.971	69.985
t-butanol	75-65-0	59.59	-0.26372	0.07264	1.9277	0.315508	-0.582732	141.505	-233.558	77.035
fluorotrichloromethane	75-69-4	50.16	-0.3232	-0.06207	0.1928	0	-0.196304	125.268	-1518.5	76.405
difluorodichloromethane	75-71-8	37.48	-0.33051	-0.03935	0.0709	0	-0.203462	110.188	-1158.15	73.557
tetrafluoromethane	75-73-0	15.12	-0.42619	0.18142	0.0006	0	-0.239318	79.206	-437.46	67.605
tetramethylsilane	75-76-3	81.95	-0.28763	0.077	0.0006	0.114346	-0.53174	173.959	-449.064	90.429
t-pentanol	75-85-4	73.25	-0.26267	0.07167	1.8896	0.315925	-0.583328	165.61	-272.844	84.144
2,2,2-trifluoroethanol	75-89-8	30.72	-0.2953	0.07199	2.093	0.338052	-0.548718	111.507	-452.711	77.067
3,3-dimethylbutanone	75-97-8	83.07	-0.24346	-0.01411	3.526	0.151747	-0.495095	181.448	-310.949	90.154
1,1,2-trichloro-1,2,2-trifluoroethane	76-13-1	63.16	-0.33292	-0.039	0.3982	0	-0.230316	163.645	-1756.27	90.31
hydrogen peroxide	7722-84-1	11.04	-0.28489	0.02569	2.3551	0.359975	-0.35998	53.284	-151.524	55.743
water	7732-18-5	5.68	-0.29572	0.07831	2.2603	0.32825	-0.656498	37.411	-76.4054	46.505
triethylphosphate	78-40-0	117.07	-0.29231	0.05424	5.3168	0.132818	-0.605589	266.26	-879.819	126.539
2-methylbutane	78-78-4	69.77	-0.30776	0.08763	0.066	0.106859	-0.3284	154.016	-197.628	79.62
2-methyl-1-propanol (isobutanol)	78-83-1	59.53	-0.26478	0.0849	1.7894	0.326335	-0.577175	141.927	-233.548	78.726
2-butanol	78-92-2	59.49	-0.26415	0.07928	1.8867	0.321379	-0.575932	141.868	-233.553	78.524
methyl ethyl ketone	78-93-3	55.06	-0.24842	-0.01208	3.5194	0.144385	-0.489342	133.526	-232.375	75.007
1,1,2-trichloroethane	79-00-5	61.69	-0.31062	-0.02927	3.8885	0.245103	-0.26787	144.144	-1458.56	79.685
trichloroethylene	79-01-6	63.91	-0.26033	-0.0268	1.2727	0.204679	-0.172929	134.698	-1457.34	77.62
propanoic acid	79-09-4	44.95	-0.27882	0.00933	1.9397	0.3413	-0.505108	119.895	-268.325	75.79
methyl acetate	79-20-9	45.15	-0.27676	0.00978	2.2521	0.154649	-0.512798	120.688	-268.313	78.203
nitroethane	79-24-3	43.44	-0.29791	-0.07097	4.3255	0.178705	-0.404341	114.334	-284.264	75.47
1,1,2,2-tetrachloroethane	79-34-5	76.87	-0.30585	-0.0348	0	0.25136	-0.263	165.54	-1918.15	86.647
dichloroacetic acid	79-43-6	55.84	-0.29907	-0.04802	1.3169	0.365953	-0.451291	139.142	-1148.22	82.713
2-nitropropane	79-46-9	57.01	-0.29715	-0.0708	4.5125	0.150304	-0.404021	139.119	-323.555	82.548
2-methyl-1-nitrobenzene	88-72-2	112.85	-0.26087	-0.0928	5.7114	0.150227	-0.424846	192.183	-475.947	83.414
2-methoxyphenol	90-05-1	98.25	-0.22061	-0.00139	2.7984	0.344938	-0.574359	184.306	-421.867	88.719
1,2-dimehtoxybenzene	91-16-7	115.57	-0.20642	0.00693	0.434	0.13251	-0.534205	209.732	-461.144	94.641
naphthalene	91-20-3	137.55	-0.21784	-0.04052	0	0.103071	-0.143733	198.742	-385.761	82.002
quinoline	91-22-5	130.63	-0.23533	-0.05547	2.8322	0.121593	-0.542775	192.513	-401.811	81.544
1,1,1,3,3,3-hexafluoropropan	920-66-1	43.21	-0.31361	0.05262	3.2959	0.356309	-0.543143	155.998	-789.736	96.111
propiophenone	93-55-0	121.24	-0.25174	-0.05975	3.9927	0.124418	-0.507832	213.292	-424.062	94.675
methyl benzoate	93-58-3	110.79	-0.26094	-0.04934	2.5068	0.136955	-0.529549	200.88	-460.003	93.353
ethyl benzoate	93-89-0	125.09	-0.26059	-0.04863	2.6504	0.125773	-0.533393	226.625	-499.297	100.666
o-xylene	95-47-6	104.28	-0.23431	0.00226	0.8257	0.12539	-0.386562	184.548	-310.746	84.216
2-methylphenol (o-cresol)	95-48-7	94.18	-0.21888	0.0011	1.4614	0.341091	-0.578145	171.798	-346.673	82.365
1,2-dichlorobenzene	95-50-1	101.87	-0.25397	-0.02356	3.6922	0.135586	-0.091041	177.728	-1151.36	83.162
o-chloroaniline	95-51-2	100.17	-0.20305	-0.00661	2.6567	0.292957	-0.694588	173.485	-747.11	81.615
o-Toluidine (2-methylaniline)	95-53-4	101.19	-0.20117	0.00593	2.2631	0.276048	-0.680477	177.254	-326.798	82.335
trimethylbenzene (Hemellitene)	95-63-6	121.07	-0.22651	0.00543	0.5143	0.127327	-0.387183	208.912	-350.039	95.411
3-pentanone	96-22-0	68.52	-0.24706	-0.01047	3.4405	0.135146	-0.494663	158.614	-271.664	82.043
cyclopentanol	96-41-3	68.66	-0.26275	0.07801	1.8542	0.319933	-0.580354	149.161	-271.644	78.07
2-methyl tetrahydrofuran	96-47-9	69.22	-0.24177	0.09131	2.0987	0.113409	-0.550395	150.798	-271.642	78.746
4-butyrolactone	96-48-0	54.22	-0.27375	0.00775	5.6435	0.161823	-0.515661	128.695	-306.412	73.007
tbutylbenzene	98-06-6	132.23	-0.24035	-0.00128	0.495	0.10594	-0.316584	232.305	-389.314	94.913
isopropylbenzene (cumene)	98-82-8	117.57	-0.24066	-0.00128	0.4346	0.107145	-0.312309	209.214	-350.028	90.857
acetophenone / octanol	98-86-2	106.8	-0.25496	-0.0586	4.0109	0.148297	-0.501983	188.071	-384.777	87.604
benzoyl chloride	98-88-4	109.96	-0.27081	-0.07962	5.4231	0.135594	-0.398324	185.512	-805.097	87.401
nitrobenzene	98-95-3	95.93	-0.27349	-0.09535	5.8164	0.141847	-0.422295	169.314	-436.662	83.546
p-chloroacetophenone	99-91-2	124.14	-0.25766	-0.06495	3.0596	0.15069	-0.497417	210.069	-844.381	94.761

## Sheet: S3
Table S3: Correlation matrix for all data points
	Tb	MW	Tc	Pc	Vc	Vm	μj	er	nD	σ	ΔHv	log P	π	eH	eL	μi	q+	q-	Vmc	E	S	ΔGs
Tb	1
MW	0.724071	1
Tc	0.870758	0.592479	1
Pc	-0.530384	-0.516112	-0.24579	1
Vc	0.0826246	-0.0106555	-0.0783023	-0.0299069	1
Vm	0.123708	0.00666792	0.183724	0.0378626	0.184981	1
μj	0.0876826	-0.23084	0.217874	0.327808	-0.0905478	0.164635	1
er	0.0485476	-0.28931	0.145987	0.379872	-0.0534015	0.16207	0.654154	1
nD	0.278315	0.238922	0.538507	0.248967	0.147257	0.0333562	0.0733418	-0.087638	1
σ	0.398265	0.192279	0.647013	0.426221	0.0806958	0.0693314	0.457018	0.3501	0.76652	1
ΔHv	0.890727	0.621314	0.760243	-0.506593	-0.0257352	0.114133	0.0707047	0.0300006	0.114934	0.230543	1
log P	0.580022	0.708826	0.366641	-0.710661	0.0567244	-0.0830202	-0.635653	-0.500108	-9.38692e-05	-0.201145	0.512369	1
π	0.0536833	0.0798414	0.0315423	-0.142362	-0.00348599	-0.0312286	-0.0611807	-0.137607	0.0219991	-0.0533625	0.0531941	0.10338	1
eH	-0.0331855	-0.0681354	-0.0246155	0.00165865	0.0274062	-0.0028248	-0.0296727	-0.0470004	0.0512603	-0.0150694	-0.0387225	-0.0263626	0.31982	1
eL	-0.013687	-0.0241429	-0.0275272	0.00999353	-0.00973943	-0.00283771	0.0133168	0.0240955	-0.0597834	-0.0441175	0.0291806	-0.0483942	-0.236458	0.0234341	1
μi	0.0378281	-0.034851	0.0541935	0.0229801	0.00202813	0.00464093	0.149805	0.0706614	0.0237245	0.0809826	0.00516804	-0.0366152	-0.0568281	-0.183004	-0.44674	1
q+	-0.0545847	-0.0860067	-0.0283229	0.149414	0.0277985	-0.000530886	0.084949	0.0798274	0.0448555	0.0865627	-0.0412667	-0.138178	-0.234422	0.164755	0.404586	-0.0342097	1
q-	0.0515115	0.0811393	0.0382622	-0.0668718	-0.0500093	-0.0013565	-0.0355426	-0.0240509	-0.035988	-0.0362826	0.058016	0.0983728	0.117012	-0.251834	-0.373323	-0.204942	-0.589405	1
Vmc	0.0494931	0.108148	0.0203233	-0.168686	-0.000616446	-0.032675	-0.0896153	-0.156873	-0.00226929	-0.0797314	0.0440182	0.118916	0.923316	0.138781	-0.0930905	-0.0192901	-0.213676	0.0263286	1
E	-0.0696929	-0.172467	-0.0627504	0.073151	0.0288203	0.0228082	0.0227416	0.0660646	-0.0152064	-0.0166027	-0.0630256	-0.107216	-0.390771	0.131258	0.320864	-0.0240448	0.262887	-0.405086	-0.382443	1
S	0.0430645	0.116365	0.0128971	-0.164927	0.00674657	-0.029076	-0.0991869	-0.150745	-0.0141814	-0.0805743	0.0329169	0.116109	0.791011	-0.0402782	-0.0627696	0.0581433	-0.190762	-0.0359843	0.952006	-0.379145	1
ΔGs	0.0399726	0.120657	-0.0202307	-0.184868	0.0288523	0.0228293	-0.299503	-0.148539	-0.0819284	-0.180599	0.00810104	0.291508	-0.72709	-0.307862	0.308571	-0.179658	-0.183131	0.129405	-0.654124	0.299893	-0.571142	1

## Sheet: S4
Table S4-1: loading values for PLS model								Table S4: Score values for PLS model
	LV#1	LV#2	LV#3	LV#4	LV#5	LV#6		Solute/Solvent	LV#1	LV#2	LV#3	LV#4	LV#5	LV#6
Tb	-0.08251	-0.201097	0.00106122	-0.337	0.507024	0.316753		'naproxen / octanol'	7.00614	-2.67943	-3.34398	-0.437462	1.17895	0.109967
MW	-0.111935	0.0077642	-0.162858	-0.373073	0.451533	0.208333		'ethyloctadecanoate / hexadecane'	9.99899	1.91904	-1.49126	-4.31791	4.28499	-2.40806
Tc	-0.0199827	-0.240373	0.217537	-0.239181	0.504883	0.33049		'ethylparaben / octanol'	5.81098	-0.543158	-3.65878	2.3934	3.37099	-0.288408
Pc	0.142577	-0.112652	0.420481	0.465262	-0.16347	-0.156164		'methyl 3-methyl-4-thiomethoxyphenyl thiophosphate / octanol'	8.02445	0.0994664	-1.81162	-1.61024	0.797083	1.53938
Vc	-0.00491273	-0.007599	0.0536722	-0.0288912	0.0742764	-0.128487		acetylsalicylic acid / octanol'	4.18215	-2.76703	-2.61699	-0.293478	-0.393978	2.18789
Vm	-0.000728832	-0.050559	0.207517	-0.00277367	0.0996842	-0.0271579		'anthracene / octanol'	4.32879	-0.179209	-2.72919	1.80907	3.60868	-1.13518
μj	0.177788	-0.330765	0.391649	0.294695	0.0024104	0.158183		'dimethyl phthalate / dimethyl phthalate'	5.70617	-2.07637	0.655164	-0.607364	1.67863	2.82273
er	0.0949449	-0.26323	0.399186	0.240719	-0.0895411	0.221456		'm-hydroxybenzaldehyde / 1,2-Dichlorethane'	2.61848	-2.26874	-1.55016	1.28556	-0.968719	0.611163
nD	0.0876162	-0.112513	0.383088	-0.0354319	0.330852	0.065305		'anthracene / heptane'	3.82798	1.14767	-3.2631	1.38465	1.35066	-1.22374
σ	0.11955	-0.287748	0.520094	0.112601	0.325705	0.187937		'p-chloroacetophenone / p-chloroacetophenone'	3.23958	-1.21092	-0.180537	0.970226	3.26992	0.973728
ΔHv	-0.102304	-0.209718	-0.0989826	-0.269164	0.48402	0.208721		'n-heptanoic acid / n-heptanoic acid'	2.74728	-2.6999	-1.5141	0.809027	1.74306	-0.0553987
log P	-0.192511	0.152674	-0.368083	-0.478432	0.287817	0.175285		'1-decanol / octanol'	3.681	-0.935246	-0.731764	-1.18252	1.95559	-2.25391
π	0.519725	0.170041	-0.224389	-0.172162	0.137217	-0.0836909		'1-decanol / decanol'	3.41101	-1.06653	-0.828799	-1.61472	2.52218	-1.96273
eH	0.165936	-0.300414	-0.122477	-0.19802	-0.160406	0.0410906		phenol / 4methyl2pentanone'	3.45489	-1.10817	-0.805443	-1.58658	2.51811	-1.92468
eL	-0.185433	-0.0918747	0.274926	-0.318359	-0.0728453	-0.451457		'2,2''-dichlorobiphenyl / octanol'	4.69443	0.950151	-2.21172	1.44681	2.48978	1.48117
μi	0.115118	-0.181017	-0.0243209	-0.0271743	-0.170874	0.405711		'tripropylphosphate / benzene'	5.8265	2.33598	1.34502	-2.30714	-0.937619	-0.560835
q+	-0.0576844	-0.642	-0.114121	0.0266455	-0.0694011	-0.330457		'm-hydroxybenzaldehyde / benzene'	2.24046	-1.8071	-1.71993	0.920285	-0.959506	0.293948
q-	-0.0319505	0.503386	-0.106694	0.396877	0.256509	0.23326		'p-cresol / pentanol'	1.62728	-2.25551	-1.64728	0.806473	-0.0264188	-0.584384
Vmc	0.513899	0.232595	-0.146686	-0.285704	0.113269	-0.147801		'2,3-dichlorobiphenyl / octanol'	4.58243	0.819735	-2.33165	1.60269	2.49072	1.55026
E	-0.259026	-0.297593	0.205862	-0.11249	-0.135835	-0.376107		'2,2''-dichlorobiphenyl / heptane'	4.19362	2.27703	-2.74564	1.02239	0.231757	1.39261
S	0.47687	0.253523	-0.100978	-0.309809	0.0913166	-0.149697		'2,6-dichlorobenzonitrile / octanol'	3.20757	-0.739879	-1.65656	-0.106474	-0.446016	3.49606
								'p-cresol / heptanol'	1.362	-2.45167	-1.79031	0.391468	0.687604	-0.359499
								'cinnamaldehyde / cinnamaldehyde'	4.38063	-2.01754	1.32647	0.273742	1.94737	2.35841
								'2,2-dichloroethenyl dimethyl phosphate / benzene'	4.6057	1.29104	0.0145714	-1.08089	-2.14737	2.81662
								'dibenzyl ether / dibenzyl ether'	4.66905	-0.0231663	0.18904	-1.30976	4.00057	-0.712911
								'1-Nonanol / 1-Nonanol'	2.87478	-1.19905	-0.686847	-1.2747	2.00737	-1.6952
								'p-methoxybenzaldehyde / p-methoxybenzaldehyde'	4.58062	-2.05198	2.08956	1.86915	2.22339	0.956711
								'p-cresol / octanol'	1.22598	-2.54412	-1.88714	0.222536	1.05573	-0.307929
								'hexanoic acid / isobutanol'	1.65785	-1.03449	-1.34591	1.61152	0.517436	-1.74509
								'o-cresol / hexanol'	1.29127	-2.29043	-1.72502	0.717558	0.483922	-0.631528
								'hexanoic acid / butanol'	1.70848	-1.11915	-1.18052	1.6031	0.733165	-1.67995
								'hexamethyl phosphoramide / hexamethyl phosphoramide'	5.27939	-1.08352	2.01136	-3.15621	-1.31775	2.99761
								'tripropylphosphate / octanol'	5.538	1.07431	0.42883	-2.63708	0.517655	0.107614
								'tripropylphosphate / carbontet'	5.51034	2.34145	0.830551	-2.52561	-0.816912	-0.520295
								'2,2-dichloroethenyl dimethyl phosphate / octanol'	4.3172	0.029371	-0.901617	-1.41083	-0.692095	3.48507
								'o-cresol / pentanol'	1.44197	-2.21139	-1.64059	0.941958	0.126533	-0.728667
								'quinoline / quinoline'	2.9028	-1.19482	1.59106	0.268007	2.65942	0.833397
								'n-octanol / n-octanol'	2.29636	-1.22083	-0.544229	-0.896524	1.52715	-1.64296
								'o-cresol / octanol'	1.04067	-2.5	-1.88045	0.358022	1.20868	-0.452213
								'benzyl alcohol / benzyl alcohol'	1.66917	-2.20777	0.187663	0.921878	2.21314	-0.590321
								'quinoline / octanol'	1.83452	-0.881913	-1.24674	0.136822	1.02629	0.388012
								'm-cresol / hexanol'	1.36083	-2.25141	-1.7236	0.722695	0.551648	-0.711171
								'm-cresol / mcresol'	1.77292	-2.40702	-0.126226	0.56531	1.81532	-0.448279
								'4-methylphenol / 4-methylphenol'	1.91188	-2.59661	-0.294053	0.634524	1.75621	-0.427095
								'3-methylphenol / 3-methylphenol'	1.72883	-2.36517	-0.149695	0.537032	1.81941	-0.486516
								'2-methyl-1-nitrobenzene / chloroform'	2.28291	0.102209	-1.1537	1.50206	-0.748069	0.759135
								'hexanoic acid / diisopropylether'	1.10973	-0.376146	-2.1372	1.11844	-0.31407	-1.84415
								'2-methylaniline / chloroform'	1.78995	-1.33086	-0.628353	-0.196875	-1.55596	-0.441864
								'm-cresol / octanol'	1.11022	-2.46098	-1.87902	0.363159	1.27641	-0.531856
								'propiophenone / propiophenone'	3.19568	-0.920141	0.860895	0.0356178	1.28974	1.46043
								'1-octanol / butylacetate'	2.40808	-0.583561	-0.619262	-0.639994	0.14951	-1.92465
								'pentanoic acid / pentanol'	0.813102	-1.30314	-1.1985	1.48045	0.913732	-1.31653
								'o-cresol / nitrobenzene'	2.79507	-3.1638	1.17865	1.14368	1.58177	0.326154
								'p-hydroxybenzaldehyde / carbontet'	1.9684	-1.82061	-2.21108	0.642043	-0.938594	0.427372
								'n-pentanoic acid / n-pentanoic acid'	0.683906	-1.5364	-1.47235	1.44881	1.73137	-1.50735
								'2,4-dimethylphenol / 2,4-dimethylphenol'	2.04593	-2.42143	-0.998584	0.424447	2.08787	-0.884094
								'2-methoxyphenol / 2-methoxyphenol'	2.66884	-2.8059	0.238203	0.585451	1.70988	0.204245
								'p-cresol / nitrobenzene'	2.98039	-3.20793	1.17195	1.00819	1.42882	0.470437
								'p-Cresol / acetonitrile'	2.57388	-1.84794	-0.151832	0.994068	-2.69442	0.674108
								'hexanoic acid / butanone'	1.9544	-0.945423	-0.984293	1.66168	-0.208982	-1.35984
								'dichloroacetic acid / dichloroacetic acid'	0.846116	-1.34672	-1.40565	3.07597	2.72451	0.44895
								'pentanoic acid / isobutanol'	0.925921	-1.14138	-1.27294	1.74815	0.340254	-1.5121
								'2-Nitrotoluene (onitrotoluene) / 2-Nitrotoluene (onitrotoluene)'	3.32191	-1.56928	1.04479	0.946521	0.954492	3.07032
								'm-Toluidine / acetonitrile'	2.81915	-1.64564	0.475026	-0.0398144	-3.53889	1.08287
								'2-methyl-1-nitrobenzene / onitrotoluene'	2.96863	-1.23398	0.856736	0.719934	0.987265	2.76393
								'm-cresol / decanol'	0.840237	-2.59226	-1.97606	-0.0690456	1.843	-0.240681
								'1-heptanol / tributylphosphate'	1.20802	-1.42284	-0.85782	-1.33035	1.80598	-1.00445
								'nitrobenzene / nitrobenzene'	3.29132	-1.73262	1.68005	1.90249	1.17218	2.56243
								'm-cresol / diethylether'	1.27599	-1.22393	-2.47208	1.10589	-1.70556	-1.34698
								'nitrobenzene / nitrobenzene'	3.00544	-1.46129	1.52787	1.71913	1.1987	2.31449
								'o-Cresol / acetonitrile'	2.38856	-1.80382	-0.145136	1.12955	-2.54147	0.529825
								'm-Cresol / acetonitrile'	2.45812	-1.7648	-0.143711	1.13469	-2.47374	0.450182
								'naphthalene / chloroform'	1.86122	1.3838	-1.11833	2.65623	1.45044	-1.12388
								'2-methylphenol / 2-methylphenol'	1.64352	-2.40335	-0.392873	0.753175	1.92359	-0.760495
								'phenol / nitrobenzene'	2.04735	-3.27662	1.22581	1.33444	1.4081	0.596347
								'o-Toluidine / acetonitrile'	2.73379	-1.71893	0.480797	-0.0735564	-3.6741	1.21936
								'p-Cresol / methanol'	2.43893	-2.06422	-1.15169	2.1449	-1.59743	-1.03751
								'1-heptanol / heptanol'	1.62838	-1.16323	-0.410531	-0.629554	1.00438	-1.54036
								'2,3-butanediol / 2,3-butanediol'	1.20085	-2.15766	0.719613	0.743726	-0.0527216	-0.339258
								'acetophenone / chloroform'	1.94084	0.261924	-0.538085	0.8841	-0.743567	0.0129089
								'4-methylaniline / butylacetate'	1.82648	-2.02816	-1.34064	-0.789451	-1.5474	0.167103
								'phenol / onitrotoluene'	1.38272	-2.86475	0.803316	0.414872	1.13833	1.1436
								'1-heptanol / octanol'	1.49236	-1.25569	-0.507366	-0.798485	1.3725	-1.48879
								'p-cresol / 1,2-Dichlorethane'	1.8925	-1.74409	-0.801186	0.917752	-0.408759	-0.659163
								'm-Toluidine (3-methylaniline) / methanol'	2.6842	-1.86192	-0.52483	1.11102	-2.4419	-0.628751
								'o-cresol / 1,2-Dichlorethane'	1.70719	-1.69996	-0.794491	1.05324	-0.255807	-0.803446
								'o-Cresol / methanol'	2.25362	-2.02009	-1.14499	2.28039	-1.44448	-1.18179
								'ethyl benzoate / ethyl benzoate'	2.88255	-0.213336	0.347114	-0.222557	1.69341	0.465238
								'diethyl malonate / diethyl malonate'	3.17019	-0.297902	0.0858695	-0.266942	1.08874	0.204855
								'tripropylphosphate / cyclohexane'	5.45837	2.39754	0.635831	-2.64346	-1.49616	-0.229428
								'acetophenone / acetophenone'	2.68124	-1.10622	1.09696	0.501647	1.06577	1.50582
								'm-Cresol / methanol'	2.32317	-1.98107	-1.14357	2.28552	-1.37675	-1.26143
								'1-decanol / hexadecane'	2.42497	-0.725585	-1.39808	-2.84944	2.96472	-1.49112
								'butanoic acid / butanol'	0.240759	-1.32221	-1.03828	1.89493	0.415896	-1.25256
								'hydrogen peroxide / hydrogen peroxide'	0.886099	-2.98309	5.14604	6.38181	2.65867	-0.452521
								'butanoic acid / isobutanol'	0.190129	-1.23755	-1.20367	1.90335	0.200166	-1.31769
								'3-methylaniline / benzene'	1.75975	-1.08015	-0.344097	-0.481402	-1.24402	-0.567622
								'pentanoic acid / secbutanol'	0.931827	-1.09882	-1.30937	1.79116	0.31889	-1.60137
								'aniline / aniline'	1.63836	-2.33392	1.14483	-0.051161	0.80946	0.122973
								'o-chloroaniline / o-chloroaniline'	2.79885	-2.58492	0.910053	-0.503011	0.569432	1.8353
								'N-methylaniline / N-methylaniline'	2.3602	-2.18319	0.746255	-0.0829515	0.888971	0.406625
								'methyl benzoate / methyl benzoate'	2.31629	-0.389597	0.564865	0.244361	1.73195	0.4091
								'aniline / tributylphosphate'	0.352382	-2.65206	-1.57058	-1.13296	0.455791	0.876201
								'nitrobenzene / benzene'	1.53953	0.464193	-0.615033	1.26342	-0.629669	0.867677
								'pentanoic acid / diisopropylether'	0.3778	-0.483044	-2.06424	1.25507	-0.491251	-1.61117
								'naphthalene / butylacetate'	1.63831	0.870932	-1.78257	2.30907	1.69838	-0.66618
								'4-methylaniline / benzene'	1.93384	-1.33787	-0.386375	-0.760562	-1.61859	-0.279865
								'p-cresol / chloroform'	1.63003	-1.45987	-1.26098	0.870749	-0.576288	-0.987111
								'1,2,4-trichlorobenzene / 1,2,4-trichlorobenzene'	2.77943	1.03773	-0.131134	1.84693	3.31496	3.23347
								'3-methylaniline / octanol'	1.47125	-2.34182	-1.26028	-0.811347	0.211255	0.100827
								'1-heptanol / ethylacetate'	1.9061	-0.473738	-0.557994	-0.0095581	-0.70848	-2.07386
								'o-Toluidine (2-methylaniline) / methanol'	2.59885	-1.9352	-0.519058	1.07728	-2.5771	-0.492261
								'aniline / 4methyl2pentanone'	1.12089	-2.04148	-0.939194	-0.145238	-1.75622	0.456958
								'pentanoic acid / butanone'	1.22247	-1.05232	-0.911328	1.79831	-0.386164	-1.12685
								'4-methylaniline / chlorobenzene'	2.15828	-1.90143	0.173509	-1.00786	-0.831464	0.454418
								'1-heptanol / chloroform'	1.89641	-0.171438	0.118794	-0.150272	-0.259511	-2.16798
								'p-cresol / 1,2-Dibromoethane'	1.77878	-1.9262	-0.16496	0.528866	1.36385	-0.7177
								'triethylphosphate / carbontet'	3.34067	1.92826	1.04606	-2.20866	-1.51659	0.329053
								'1-heptanol / diethylether'	1.65813	-0.0186425	-1.10042	-0.0557518	-1.60946	-2.30391
								'tripropylphosphate / heptane'	5.03718	2.40119	-0.105085	-3.0615	-1.74036	0.0190553
								'1,2-dimehtoxybenzene / 1,2-dimehtoxybenzene'	2.13731	0.0824215	1.13278	-1.10404	1.23962	0.156901
								'phenol / 1,2-Dichlorethane'	0.95946	-1.81278	-0.747327	1.244	-0.429476	-0.533253
								'o-cresol / bromoform'	1.47355	-1.90578	0.491413	0.15292	2.43856	-0.430936
								'4-methylaniline / octanol'	1.64534	-2.59954	-1.30256	-1.09051	-0.163318	0.388584
								'o-cresol / benzene'	1.32917	-1.23833	-0.964259	0.687967	-0.246594	-1.12066
								'butanoic acid / 4methyl2pentanone'	0.160171	-1.24449	-1.08815	1.50757	0.0772597	-0.780567
								'benzonitrile / benzonitrile'	2.09645	-1.20096	1.71879	0.481434	0.361608	2.03006
								'c-hexanol / c-hexanol'	0.81656	-1.55786	0.61767	0.187247	0.996523	-1.20819
								'4-methylaniline / toluene'	1.79895	-1.51086	-0.493509	-1.07122	-1.38937	0.0586033
								'aniline / 1,2-Dichlorethane'	1.30325	-1.68487	-0.134169	0.0941251	-1.44217	0.0406243
								'quinoline / cyclohexane'	1.75489	0.441319	-1.03973	0.13045	-0.987523	0.0509703
								'2-methylaniline / benzene'	1.6744	-1.15344	-0.338326	-0.515144	-1.37922	-0.431132
								'n-butanoic acid / n-butanoic acid'	0.0894325	-1.42874	-1.23926	1.75553	1.06175	-1.35718
								'pentyl acetate / chloroform'	2.21498	1.21902	0.521191	-0.0201543	-0.409129	-1.06946
								'p-cresol / benzene'	1.51448	-1.28245	-0.970955	0.552481	-0.399546	-0.976379
								'butanoic acid / ethylacetate'	0.089746	-0.905967	-1.41971	1.84064	-0.225194	-1.43073
								'butanoic acid / secbutanol'	0.196035	-1.19499	-1.2401	1.94636	0.178802	-1.40696
								'butanoic acid / butanone'	0.486678	-1.14848	-0.842056	1.9535	-0.526252	-0.932446
								'hexanoic acid / 1,2-Dichlorethane'	1.81025	-0.684822	-0.425366	1.4551	0.708573	-1.62429
								'benzylamine / benzylamine'	1.86536	-1.62028	0.672245	0.135418	1.32683	-0.483473
								'aniline / butylacetate'	0.817871	-1.91353	-1.2582	-0.300035	-1.36177	0.170376
								'benzonitrile / benzonitrile'	2.1366	-1.23798	1.7008	0.2093	-0.0353672	2.37863
								'm-cresol / bromobenzene'	1.52024	-1.94787	-0.12909	0.255696	1.29003	-0.301447
								'benzamide / heptane'	1.03592	-1.03724	-2.38085	-0.217123	-1.62773	0.330425
								'methyl benzoate / octanol'	1.70573	-0.416217	-0.957088	0.183107	1.33183	0.119822
								'N,N-dimethylaniline / N,N-dimethylaniline'	2.41781	-0.485468	0.682449	-1.25092	-0.1528	1.13676
								'o-cresol / xylene (mixed isomers)'	1.01675	-1.4954	-0.943854	0.181703	0.872417	-1.08584
								'o-cresol / ethylbenzene'	1.10719	-1.57493	-1.11239	0.167773	0.278415	-0.556396
								'naphthalene / diethylether'	1.62294	1.5366	-2.33755	2.75075	0.100492	-1.25982
								'methyl hexanoate / chloroform'	2.10098	1.35908	0.60384	0.0228329	-0.276821	-1.21844
								'tripropylphosphate / hexane'	5.12032	2.5482	-0.2009	-2.8331	-2.19516	-0.174254
								'naphthalene / diisopropylether'	1.42317	1.40826	-2.37037	2.36657	0.595331	-1.01579
								'p-cresol / chlorobenzene'	1.73893	-1.84601	-0.411071	0.305181	0.387583	-0.242096
								'3-methylaniline / carbontet'	1.4436	-1.07468	-0.858564	-0.699875	-1.12331	-0.527082
								'benzaldehyde / 1,2-Dichlorethane'	1.43146	0.205827	0.0795651	1.21602	-0.633349	0.654748
								'benzonitrile / chloroform'	1.12224	0.294717	-0.170044	0.746017	-1.11914	0.256937
								'phenol / 1,2-Dibromoethane'	0.84574	-1.99489	-0.111101	0.855116	1.34313	-0.59179
								'2-methyl-1-nitrobenzene / diethylether'	2.04463	0.255004	-2.37292	1.59658	-2.09802	0.623197
								'diiodomethane / diiodomethane'	0.846524	-2.98875	1.60247	0.279042	3.4686	-1.01252
								'methyl benzoate / carbontet'	1.67808	0.850926	-0.555367	0.294578	-0.0027398	-0.508087
								'propanoic acid / cyclohexanone'	-0.0899558	-1.72995	0.237575	1.7086	0.89891	-0.223462
								'p-cresol / xylene (mixed isomers)'	1.20207	-1.53953	-0.95055	0.0462172	0.719465	-0.941558
								'n-hexanol / n-hexanol'	1.07824	-1.20898	-0.239751	-0.252061	0.483515	-1.39757
								'ethyl phenyl ether / chloroform'	1.8864	0.59909	0.223599	-0.111956	-1.06248	-0.322769
								'2-methylaniline / carbontet'	1.35825	-1.14796	-0.852793	-0.733617	-1.25852	-0.390591
								'o-cresol / iodobenzene'	1.4943	-2.0725	0.334894	-0.0325702	2.18739	-0.157498
								'phenol / chloroform'	0.69699	-1.52856	-1.20712	1.197	-0.597005	-0.861201
								'1-heptanol / butylacetate'	1.6735	-0.684308	-0.545445	-0.497429	-0.0115785	-1.71028
								'iodobenzene / iodobenzene'	1.45297	-1.04413	0.0769782	1.61764	3.45594	-0.12984
								'tetramethylurea / tetramethylurea'	2.59644	-1.1391	2.06324	-1.9235	-2.39895	2.56857
								'phenol / benzene'	0.581443	-1.35114	-0.917096	0.878732	-0.420263	-0.850469
								'p-cresol / bromobenzene'	1.70556	-1.99199	-0.135786	0.12021	1.13707	-0.157163
								'di-n-butyl sulfide / di-n-butyl sulfide'	3.32712	0.776909	-0.179417	-1.14267	0.64643	0.947706
								'thiophenol / methylenechloride'	1.30987	1.4882	-0.374419	2.60691	-0.245496	0.535867
								'acetophenone / carbontet'	1.50914	0.444819	-0.762525	0.347358	-0.446119	0.0641813
								'1-hexanol / octanol'	0.758612	-1.35303	-0.43192	-0.65587	1.21468	-1.27812
								'propanoic acid / butanone'	-0.246419	-1.25428	-0.772627	2.09761	-0.695064	-0.70487
								'benzaldehyde / benzaldehyde'	2.09983	-0.624526	1.63754	0.843262	0.404333	1.94845
								'naphthalene / heptane'	0.956362	1.62644	-2.27841	1.58359	0.824441	-0.533257
								'methyl benzoate / cyclohexane'	1.62611	0.907016	-0.750086	0.176735	-0.681988	-0.21722
								'p-cresol / iodobenzene'	1.67962	-2.11662	0.328199	-0.168056	2.03444	-0.0132149
								'propanoic acid / secbutanol'	-0.537062	-1.30078	-1.17067	2.09047	0.00999041	-1.17938
								'naphthalene / octanol'	1.45717	0.299555	-1.74449	2.00802	3.08246	-0.444699
								'hexanoic acid / toluene'	1.29735	-0.396175	-0.702269	0.779176	0.947004	-1.60304
								'N-methylaniline / octanol'	1.41451	-2.27115	-1.43432	-0.500778	0.277189	0.394025
								'hexanoic acid / benzene'	1.43223	-0.223183	-0.595134	1.08983	0.717786	-1.94151
								'phenol / toluene'	0.446559	-1.52413	-1.02423	0.568077	-0.191045	-0.512
								'nitrobenzene / carbontet'	1.22338	0.469664	-1.1295	1.04495	-0.508962	0.908217
								'1,2-Dichlorobenzene / 1,2-Dichlorobenzene'	2.18135	0.68614	0.366631	1.76869	1.72271	3.36705
								'N,N-diethylformamide / N,N-diethylformamide'	2.26936	-0.964771	1.96232	-0.677083	-1.75516	2.14682
								'1,2-dichlorobenzene / odichlorobenzene'	1.96696	0.889632	0.252501	1.63118	1.7426	3.1811
								'N,N-dimethylacetamide / N,N-dimethylacetamide'	1.77303	-1.27337	2.33028	-0.747761	-2.15739	2.5291
								'phenol / bromoform'	0.725827	-2.01859	0.538576	0.343685	2.26489	-0.160743
								'o-cresol / bromobenzene'	1.52024	-1.94787	-0.12909	0.255696	1.29003	-0.301447
								'butylbenzene / butylbenzene'	1.8251	1.31166	-0.153758	-0.272887	1.98067	-0.672091
								propanoic acid / octanol'	1.8486	1.28936	-0.141248	-0.257813	1.97849	-0.651708
								'3-ethyl-2-methoxypyrazine / octanol'	1.99477	-0.428724	-0.947758	-0.0606384	1.21341	0.181522
								'1-heptanol / benzene'	1.78086	0.0059857	0.408822	-0.46854	-0.0827697	-2.15724
								'nitrobenzene / diethylether'	1.4168	0.439564	-2.12428	1.67621	-2.15636	0.721007
								'propanoic acid / 4methyl2pentanone'	-0.572926	-1.35028	-1.01873	1.65168	-0.0915522	-0.552991
								'butanoic acid / diisopropylether'	-0.357993	-0.579207	-1.99496	1.41027	-0.631339	-1.41676
								'di(2-chloroethyl)ether / di(2-chloroethyl)ether'	2.72169	-0.327973	1.36668	-0.227431	-0.712242	3.40512
								'phenol / xylene (mixed isomers)'	0.269028	-1.60821	-0.896691	0.372468	0.698748	-0.815648
								'1-hexanol / diethylether'	0.924378	-0.115991	-1.02498	0.0868637	-1.76729	-2.09324
								'phenol / ethylbenzene'	0.359461	-1.68774	-1.06522	0.358538	0.104746	-0.286203
								'ethyl trichloroacetate / ethyl trichloroacetate'	3.1871	0.753475	-0.499182	0.780752	0.589559	3.36934
								'ethyl phenyl ether / ethyl phenyl ether'	1.67286	0.0271038	0.670094	-1.10318	0.208502	0.761031
								'1-heptanol / 1,2-Dichlorethane'	2.15888	-0.455653	0.57859	-0.103269	-0.0919829	-1.84003
								'acetophenone / diethylether'	1.70255	0.414719	-1.7573	0.97862	-2.09352	-0.123029
								'1-heptanol / chlorobenzene'	2.00531	-0.557572	0.968706	-0.715841	0.704359	-1.42296
								'triethylphosphate / hexane'	2.95065	2.13501	0.0146079	-2.51615	-2.89484	0.675094
								'N,N-dimethylacetamide / dimethylacetamide'	1.60884	-1.11753	2.24288	-0.853072	-2.14216	2.3867
								'methyl benzoate / decalin'	1.36135	0.777977	-0.582436	-0.0279468	1.02502	-0.918909
								'phenol / butylbenzene'	0.0348214	-1.86528	-1.29355	-0.103822	0.646791	0.0123749
								'o-cresol / iodobenzene'	1.4943	-2.0725	0.334894	-0.0325702	2.18739	-0.157498
								'ethyl phenyl ether / ethoxybenzene'	1.60615	0.0904212	0.634582	-1.14597	0.214691	0.703173
								'1-heptanol / toluene'	1.64598	-0.167006	0.301687	-0.779195	0.146448	-1.81878
								'acetophenone / octanol'	1.53679	-0.822323	-1.16425	0.235887	0.888449	0.692091
								'1-heptanol / xylene (mixed isomers)'	1.46845	-0.251092	0.429227	-0.974804	1.03624	-2.12242
								'methyl benzoate / isooctane'	1.01206	1.02497	-1.5522	-0.581082	-1.0511	0.316462
								'butyl acetate / chloroform'	1.47488	1.12391	0.593077	0.133483	-0.549956	-0.875581
								'm-cresol / chloroform'	1.51427	-1.37673	-1.25286	1.01137	-0.35561	-1.21104
								'1-heptanol / ethylbenzene'	1.55888	-0.330616	0.260696	-0.988734	0.442239	-1.59298
								'1-pentanol / tributylphosphate'	-0.261896	-1.61848	-0.708105	-1.04191	1.49278	-0.585605
								'm-dichlorobenzene / m-dichlorobenzene'	1.76144	1.04447	-0.0943104	1.95663	2.19827	2.42346
								'methyl pentanoate / chloroform'	1.37078	1.25441	0.679424	0.155872	-0.45673	-0.98307
								'triethylphosphate / heptane'	2.86751	1.988	0.110423	-2.74456	-2.44004	0.868403
								'1-hexanol / chloroform'	1.16266	-0.268786	0.194241	-0.00765655	-0.417339	-1.9573
								'aniline / diisopropylether'	0.602728	-1.3762	-1.846	-0.242535	-2.46482	-0.179231
								'hexanoic acid / xylene (mixed isomers)'	1.11982	-0.48026	-0.574729	0.583567	1.8368	-1.90669
								'c-pentanone / c-pentanone'	0.924676	-0.756808	1.01611	0.691635	-0.975913	1.34878
								'4-butyrolactone / 4-butyrolactone'	1.24345	-1.65747	2.63491	0.550197	-0.910336	2.8298
								'dimethylcyanamide / dimethylcyanamide'	1.12437	-1.4128	2.50503	-0.754685	-3.15528	3.58013
								'1-heptanol / 1,2-Dibromoethane'	2.04516	-0.637764	1.21482	-0.492156	1.68062	-1.89857
								'1-pentanol / 1-pentanol'	0.48383	-1.21974	-0.0858086	0.112423	-0.0284163	-1.2943
								'nitrobenzene / octanol'	1.25103	-0.797478	-1.53122	0.933474	0.825605	1.53613
								'i-pentanol / i-pentanol'	0.419094	-1.18072	-0.209343	0.228945	-0.076852	-1.463
								'propanoic acid / propanoic acid'	-0.471269	-1.35402	-0.962097	2.0759	0.376338	-1.15219
								'1-hexanol / butylacetate'	0.939753	-0.781657	-0.469999	-0.354813	-0.169406	-1.4996
								'nitrobenzene / cyclohexane'	1.17141	0.525754	-1.32422	0.927102	-1.18821	1.19909
								'pentanoic acid / chloroform'	0.815849	-0.507504	-0.812197	1.54473	0.363863	-1.71926
								'4-methylpyridine / octanol'	0.197193	-0.560194	-0.550098	0.152749	0.75905	0.603721
								'N-methylaniline / carbontet'	1.38686	-1.00401	-1.0326	-0.389307	-1.05738	-0.233884
								'methyl hexanoate / 1,2-Dichlorethane'	2.36345	1.07486	1.06364	0.0698358	-0.109292	-0.890493
								'pentyl acetate / benzene'	2.09944	1.39644	0.811219	-0.338423	-0.232387	-1.05873
								'dimethylformamide / dimethylformamide'	1.1571	-1.27192	2.63682	-0.167808	-2.17007	2.65668
								'1,8-cineole / 1,8-cineole'	2.61129	0.724772	1.36441	-2.12978	-0.164203	-0.015854
								'o-cresol / carbontet'	1.01302	-1.23285	-1.47873	0.469493	-0.125887	-1.08012
								'aniline / diethylether'	0.802497	-1.24786	-1.81318	0.141643	-2.95966	-0.423261
								'1-heptanol / odichlorobenzene'	2.08104	-1.01828	1.38547	-1.01124	1.54037	-0.880001
								'1-heptanol / carbontet'	1.46471	0.0114574	-0.105645	-0.687014	0.0379367	-2.1167
								'pentyl acetate / chlorobenzene'	2.32388	0.832882	1.3711	-0.585723	0.554741	-0.324446
								'pentanoic acid / 1,2-Dichlorethane'	1.07832	-0.79172	-0.352401	1.59173	0.531391	-1.39131
								'1,2,3-Trimethylbenzene (Hemellitene) / 1,2,3-Trimethylbenzene (Hemellitene)'	1.48784	0.590335	0.249398	-0.110088	1.50023	-0.324264
								'trimethylbenzene (Hemellitene) / trimethylbenzene'	1.62123	0.766058	0.29399	-0.307546	1.5346	-0.481592
								'3-methylaniline / cyclohexane'	1.39163	-1.01859	-1.05328	-0.817719	-1.80256	-0.236214
								'5-nonanone / hexadecane'	1.97426	0.167508	-1.07618	-2.80249	1.8169	0.856417
								'2-heptanone / chlorobenzene'	2.27629	0.369545	1.08679	-0.619258	-0.065071	0.514171
								'2,4-dimethylpyridine / 2,4-dimethylpyridine'	1.9272	-0.33277	0.922848	0.0488863	0.292136	0.586037
								'aniline / pentanol'	1.03803	-2.1963	-0.980264	-0.0171542	-1.05983	0.115403
								'2-methylaniline / cyclohexane'	1.30628	-1.09187	-1.04751	-0.851461	-1.93776	-0.0997237
								'tbutylbenzene / tbutylbenzene'	1.67249	1.30996	-0.19926	-0.0512472	1.88566	-0.657683
								'acetic acid / cyclohexanone'	-0.776457	-1.83371	0.280435	1.8745	0.751042	0.00473319
								'tert-Butylbenzene / tert-Butylbenzene'	1.66824	1.31399	-0.201524	-0.0539747	1.88605	-0.661371
								'N-methylaniline / decalin'	1.07013	-1.07696	-1.05967	-0.711832	-0.0296157	-0.644706
								'pentyl acetate / toluene'	1.96455	1.22345	0.704084	-0.649077	-0.00316962	-0.720261
								'2-ethylpyrazine / octanol'	0.617252	-0.264999	-0.891772	0.705868	1.73177	-0.158553
								'3-methylpyridine / octanol'	0.175766	-0.534344	-0.564066	0.178162	0.766751	0.640462
								'1-pentanol / octanol'	0.022452	-1.45132	-0.357651	-0.510048	1.0593	-1.06995
								'2,6-dimethylpyridine / benzene'	1.02299	0.65666	0.38841	0.130965	-0.613931	-0.47701
								'anisole / anisole'	1.26594	-0.118196	1.01483	-0.386496	0.118957	0.542951
								'di-n-butylamine / di-n-butylamine'	2.35234	-0.1484	-0.296459	-1.77215	-0.0594391	-1.20412
								'2-octanone / octanol'	2.35598	-0.275899	-0.501652	-0.754009	0.76726	0.267316
								'methyl hexanoate / toluene'	1.85055	1.36351	0.786733	-0.60609	0.129139	-0.869241
								'nitrobenzene / decalin'	0.906651	0.396716	-1.15657	0.722421	0.5188	0.497396
								'2-heptanone / benzene'	2.05184	0.933102	0.52691	-0.371958	-0.8522	-0.220111
								'diethyl sulfite / diethyl sulfite'	2.98891	-0.265494	2.21698	-0.823154	-0.417776	2.53927
								'pentyl acetate / carbontet'	1.78328	1.40191	0.296751	-0.556896	-0.111681	-1.01819
								'3-methylaniline / heptane'	0.970443	-1.01494	-1.7942	-1.23577	-2.04676	0.0122687
								'pentyl acetate / bromobenzene'	2.29051	0.686896	1.64639	-0.770694	1.30423	-0.239514
								'N-methylaniline / cyclohexane'	1.33489	-0.947922	-1.22732	-0.50715	-1.73663	0.0569836
								'anisole / anisole'	1.20168	-0.0572064	0.980623	-0.427711	0.124919	0.48722
								'water / water'	0.27782	-2.94462	6.09176	5.08604	0.431545	-1.00241
								'1,4-dichlorobenzene / chloroform'	1.47935	2.0172	-1.14417	3.12775	1.1633	0.594877
								'p-cresol / carbontet'	1.19833	-1.27698	-1.48542	0.334007	-0.278839	-0.935838
								'methyl benzoate / hexadecane'	0.449699	-0.206555	-1.62341	-1.48381	2.34096	0.882615
								'4-methylaniline / cyclohexane'	1.56571	-1.27631	-1.09556	-1.09688	-2.17713	0.051543
								'1-octanol / hexadecane'	0.970906	-0.945277	-1.2475	-2.60797	2.54272	-0.940373
								'2-heptanone / toluene'	1.91696	0.76011	0.419775	-0.682613	-0.622982	0.118357
								'acetic acid / aniline'	-0.74196	-1.74649	1.10816	1.91166	2.32626	-0.658781
								'hydrazine / hydrazine'	0.478245	-2.13042	5.3879	2.96018	0.0604655	0.181609
								'1-butanol / tributylphosphate'	-0.996806	-1.7127	-0.631591	-0.896542	1.34164	-0.382942
								'benzonitrile / carbontet'	0.690544	0.477612	-0.394484	0.209275	-0.821692	0.308209
								'1,4-dichlorobenzene / carbontet'	1.04765	2.2001	-1.36861	2.59101	1.46075	0.646149
								'piperidine / octanol'	-0.361204	-1.25162	-0.169446	-0.695249	0.553258	-0.30977
								'methyl benzoate / benzene'	1.99423	0.845454	-0.0408995	0.513052	-0.123446	-0.548627
								'methyl hexanoate / xylene (mixed isomers)'	1.67302	1.27942	0.914272	-0.801699	1.01893	-1.17289
								'cyclohexanone / cyclohexanone'	1.57571	-0.763286	1.22386	0.182194	-0.698327	1.66684
								'acetic anhydride / acetic anhydride'	1.58392	-0.920055	0.679097	1.15421	-0.852921	1.74337
								'bis(methoxyethyl) ether / bis(methoxyethyl) ether'	1.88632	1.01989	1.2982	-1.26371	-0.123475	-0.635982
								'bromobenzene / bromobenzene'	2.88872	1.921	-0.41623	1.92532	0.742342	6.10142
								'o-cresol / hexane'	0.622996	-1.0261	-2.51018	0.162008	-1.50414	-0.73408
								'cyclohexanone / cyclohexanone'	1.42704	-0.622176	1.14471	0.0868359	-0.684534	1.53789
								'o-xylene / chloroform'	1.13253	1.05317	0.0367371	1.00554	0.0567143	-0.996792
								'acetophenone / decalin'	1.19241	0.371871	-0.789594	0.0248328	0.581644	-0.34664
								'2-ethoxyethanol / 2-ethoxyethanol'	0.709815	-1.4149	0.124762	0.448115	-0.48145	-0.88129
								'methyl hexanoate / perfluorobenzene'	1.39093	1.39361	-0.636645	-0.499464	-0.225354	-1.25818
								'o-cresol / nonane'	0.349619	-1.43448	-2.32708	-0.485668	-0.246153	-0.195643
								'propanoic acid / aniline'	-0.0554588	-1.64273	1.0653	1.74575	2.47413	-0.886976
								'p-cresol / octane'	0.624059	-1.34514	-2.36197	-0.43693	-0.799014	-0.196604
								'methyl hexanoate / isopropylbenzene'	1.57223	1.17805	0.570795	-1.05087	0.575287	-0.532226
								'pentyl acetate / xylene (mixed isomers)'	1.78702	1.13936	0.831624	-0.844686	0.886624	-1.02391
								'N-methylaniline / hexadecane'	0.158481	-2.06149	-2.10064	-2.16769	1.28632	1.15682
								'4-methylaniline / hexane'	1.22766	-1.12565	-1.93229	-1.28652	-2.87613	0.106716
								'4-methylpyridine / 4-methylpyridine'	1.31363	-0.445871	1.31172	0.78059	0.183273	0.879356
								'piperidine / isobutanol'	0.152915	-0.801251	-0.00403004	0.156384	-1.10237	-0.781797
								'4-methylpyridine / benzene'	0.485693	0.701477	0.36609	0.482694	-0.696224	-0.0647281
								'o-cresol / octane'	0.438743	-1.30101	-2.35528	-0.301445	-0.646062	-0.340887
								'methyl hexanoate / trimethylbenzene'	1.70702	0.986555	0.928118	-1.03282	1.06398	-0.452661
								'pentyl acetate / perfluorobenzene'	1.50493	1.25355	-0.719293	-0.542451	-0.357662	-1.1092
								'1,2-dichlorobenzene / hexadecane'	0.122253	0.861888	-2.30666	0.177016	2.58386	3.3351
								'1-butanol / 1-butanol'	-0.084401	-1.23993	0.083365	0.519148	-0.537605	-1.21927
								'3-methylaniline / octane'	0.869328	-1.14284	-1.73511	-1.47081	-1.64349	0.212153
								'2-heptanone / perfluorobenzene'	1.45734	0.790217	-1.0036	-0.575987	-0.977475	-0.270581
								'2-heptanone / xylene (mixed isomers)'	1.73943	0.676025	0.547315	-0.878222	0.266811	-0.185291
								'2-methylpyridine / octanol'	-0.0047052	-0.572212	-0.508821	0.161811	0.840091	0.425698
								'phenol / carbontet'	0.265291	-1.34567	-1.43156	0.660258	-0.299557	-0.809929
								'acetophenone / hexadecane'	0.280756	-0.612662	-1.83056	-1.43103	1.89758	1.45488
								'nitrobenzene / heptane'	0.750221	0.529404	-2.06514	0.509053	-1.43241	1.44757
								'acetophenone / heptane'	1.03598	0.504559	-1.69816	-0.188535	-1.36957	0.603532
								'3-methylpyridine / 3-methylpyridine'	1.21396	-0.359131	1.18764	0.789858	0.205626	0.805421
								'pentyl acetate / isopropylbenzene'	1.68623	1.03799	0.488146	-1.09386	0.442978	-0.383246
								'benzaldehyde / octanol'	0.76494	-0.594205	-1.00639	0.520801	0.831138	1.00598
								'1-hexanol / benzene'	1.04711	-0.0913626	0.484268	-0.325925	-0.240597	-1.94657
								'1-pentanol / ethylacetate'	0.436188	-0.669375	-0.408279	0.278879	-1.02168	-1.65501
								'methyl hexanoate / tbutylbenzene'	1.48398	1.0833	0.562766	-1.24843	0.797457	-0.337842
								'1-hexanol / toluene'	0.912228	-0.264355	0.377134	-0.63658	-0.0113797	-1.6081
								'propanoic acid / dibutylether'	-1.27979	-1.02575	-1.60254	0.974828	0.290827	-0.64297
								'1,2-dichlorobenzene / undecane'	0.476871	1.48451	-2.09239	0.619215	0.836693	3.12946
								'1-pentanol / diethylether'	0.188218	-0.214279	-0.950707	0.232686	-1.92266	-1.88507
								'benzaldehyde / carbontet'	0.737288	0.672938	-0.604671	0.632272	-0.50343	0.378072
								'2-heptanone / ethylbenzene'	1.82986	0.5965	0.378784	-0.892152	-0.327191	0.344154
								'phenol / tetrachloroethene'	0.322765	-1.59411	-0.893338	0.430099	0.591655	-0.579557
								'aniline / carbontet'	0.609078	-1.21776	-0.818404	-0.48962	-1.31225	-0.236051
								'aniline / xylene (mixed isomers)'	0.612815	-1.48031	-0.283532	-0.77741	-0.31395	-0.241771
								'benzonitrile / octanol'	0.718197	-0.789531	-0.796204	0.0978041	0.512876	0.936119
								'pentyl acetate / trimethylbenzene'	1.82102	0.846495	0.845469	-1.07581	0.931673	-0.303681
								'nitrobenzene / hexane'	0.833359	0.676414	-2.16095	0.737461	-1.88721	1.25426
								'cumene / cumene'	1.1395	1.35353	-0.0849685	0.245528	1.5241	-0.666284
								'benzaldehyde / diethylether'	0.930707	0.642838	-1.59945	1.26353	-2.15083	0.190862
								'1-hexanol / 1,2-Dibromoethane'	1.31141	-0.735112	1.29026	-0.34954	1.52279	-1.68789
								'2-methylaniline / hexadecane'	0.129869	-2.20545	-1.92083	-2.51201	1.08518	1.00011
								'2,6-dimethylpyridine / 2,6-dimethylpyridine'	1.31905	-0.1704	0.615096	0.089395	0.186806	0.164174
								'o-xylene / carbontet'	0.700828	1.23606	-0.187703	0.468794	0.354162	-0.945519
								'2-methylaniline / octane'	0.783976	-1.21613	-1.72934	-1.50456	-1.77869	0.348643
								'methyl hexanoate / isopropyltoluene'	1.41135	1.30036	0.699348	-1.44515	0.550672	-0.23705
								'acetophenone / hexane'	1.11912	0.651569	-1.79398	0.0398728	-1.82437	0.410223
								'isopropylbenzene / isopropylbenzene'	1.13143	1.36119	-0.0892649	0.240352	1.52485	-0.673283
								'2,6-dimethylpyridine / dimethylpyridine'	1.22951	-0.0854199	0.567434	0.0319678	0.195112	0.0865208
								'4-methylaniline / hexadecane'	0.389303	-2.38988	-1.96888	-2.75742	0.845814	1.15138
								'1,4-dichlorobenzene / hexadecane'	-0.180726	1.14262	-2.43665	0.812619	3.80445	2.03685
								'1-hexanol / 1,2-Dichlorethane'	1.42513	-0.553002	0.654036	0.0393463	-0.249811	-1.62936
								'pentyl acetate / isopropyltoluene'	1.52535	1.1603	0.6167	-1.48813	0.418364	-0.0880704
								'1-heptanol / cyclohexane'	1.41274	0.0675474	-0.300365	-0.804858	-0.641311	-1.82584
								'dipropylamine / octanol'	1.00672	-0.934064	0.0108606	-1.36096	0.596152	-0.6637
								'styrene / styrene'	0.880463	1.00113	0.00922411	1.10535	1.83925	-0.412492
								'1,2-dichlorobenzene / heptane'	0.877475	1.97911	-2.17425	1.41951	-0.683287	2.48375
								'pentanoic acid / benzene'	0.700302	-0.330081	-0.52217	1.22646	0.540605	-1.70853
								'2-heptanone / trimethylbenzene'	1.77342	0.383157	0.56116	-1.10934	0.311861	0.534936
								'1,2-dichlorobenzene / octanol'	1.37829	0.652227	-1.64034	1.84393	1.57473	2.57231
								'o-cresol / heptane'	0.539858	-1.17311	-2.41436	-0.0663997	-1.04934	-0.540771
								'4-methylaniline / octane'	1.04341	-1.40056	-1.77739	-1.74997	-2.01806	0.49991
								'ethyl phenyl ether / cyclohexane'	1.40273	0.838075	-0.19556	-0.766541	-1.44428	0.0193708
								'p-cresol / decane'	0.554826	-1.67173	-2.31105	-0.589358	0.0660703	-0.123549
								'2-heptanone / mesitylene'	1.66471	1.24375	0.964734	-1.72161	-1.38818	1.14701
								'butanoic acid / chloroform'	0.0800567	-0.603667	-0.742925	1.69993	0.223775	-1.52485
								'thiophenol / octanol'	0.551765	0.492143	-1.17943	1.51547	1.83159	1.25253
								'2-heptanone / isopropylbenzene'	1.63864	0.574656	0.203837	-1.12739	-0.176834	0.455371
								'valeronitrile / valeronitrile'	0.705105	-0.294979	1.30126	0.419201	-0.838901	0.587972
								'thioanisole / chloroform'	2.19254	0.351154	-0.43755	0.458311	-0.965689	0.328162
								'2-butanone / mcresol'	0.0866556	-0.615555	1.54451	0.0270151	0.677489	1.19739
								'1-hexanol / chlorobenzene'	1.27156	-0.65492	1.04415	-0.573225	0.546531	-1.21229
								'2-methoxyethanol / 2-methoxyethanol'	0.177139	-1.69104	0.346289	1.02326	-0.396527	-0.913579
								'o-xylene / o-xylene'	0.873768	0.804143	0.332169	0.189818	0.92569	-0.366293
								'pentamethylene sulfide / pentamethylene sulfide'	1.21904	0.294924	1.31299	0.31556	0.0349949	1.52658
								'butyl acetate / 1,2-Dichlorethane'	1.73735	0.839696	1.05287	0.180486	-0.382427	-0.547633
								'2-heptanone / butylbenzene'	1.50522	0.41896	0.150453	-1.35451	0.214854	0.642732
								'1,2-diaminoethane / 1,2-diaminoethane'	0.410153	-1.61581	2.21993	0.63476	-0.87735	-0.689482
								'1-hexanol / bromobenzene'	1.23818	-0.800906	1.31944	-0.758196	1.29602	-1.12736
								'pentyl acetate / tbutylbenzene'	1.59798	0.943236	0.480117	-1.29142	0.665148	-0.188862
								'm-cresol / hexadecane'	-0.145808	-2.25131	-2.54534	-1.30376	2.28554	0.230937
								'morpholine / morpholine'	0.47334	-1.07789	1.29522	0.449512	-0.225153	-0.626016
								'1-pentanol / chloroform'	0.426499	-0.367075	0.26851	0.138165	-0.572712	-1.74913
								'acetic acid / acetic acid'	-0.900327	-1.35175	-0.604361	2.53769	-0.203912	-0.962006
								'pentanoic acid / toluene'	0.565418	-0.503073	-0.629304	0.915806	0.769822	-1.37006
								'p-cresol / hexadecane'	-0.0300477	-2.33446	-2.55346	-1.44438	2.06486	0.454864
								'2-heptanone / tbutylbenzene'	1.55038	0.479898	0.195808	-1.32495	0.0453356	0.649755
								'pyridine / isobutanol'	-0.241369	0.0015335	-0.245863	1.31453	-0.852571	0.222429
								'dipropylamine / isobutanol'	1.52084	-0.483696	0.176276	-0.509324	-1.05947	-1.13573
								'2-ethylpyrazine / dibutylether'	0.394554	0.502964	-1.19466	0.484872	0.335623	-0.183432
								'2-methylpyridine / benzene'	0.283795	0.689459	0.407367	0.491756	-0.615183	-0.242751
								'benzonitrile / decalin'	0.373816	0.404663	-0.421553	-0.11325	0.20607	-0.102612
								'm-xylene / chloroform'	1.30319	1.13564	0.0424435	0.992055	0.202705	-1.17585
								'2-methyl-1-propanol / 2-methyl-1-propanol'	-0.219023	-1.14409	-0.169078	0.625982	-0.619871	-1.42467
								'1-hexanol / xylene (mixed isomers)'	0.734697	-0.34844	0.504673	-0.832189	0.878414	-1.91175
								'2-hexanone / chlorobenzene'	1.53621	0.255863	1.15408	-0.474866	-0.239762	0.746305
								'methyl pentanoate / benzene'	1.25523	1.43183	0.969451	-0.162396	-0.279988	-0.972338
								'2-methoxyethanol / octanol'	-0.836098	-1.72235	-0.39376	-0.347233	0.562177	-0.298735
								'butanoic acid / 1,2-Dichlorethane'	0.342526	-0.887882	-0.283129	1.74693	0.391303	-1.1969
								'methyl pentanoate / chlorobenzene'	1.47968	0.868275	1.52934	-0.409697	0.507141	-0.238055
								'2-octanone / hexadecane'	1.09995	-0.0662376	-1.16797	-2.42093	1.77639	1.03011
								'pentyl acetate / bromooctane'	1.23064	0.789682	0.0278156	-1.56802	1.17707	-0.108766
								'1,4-dichlorobenzene / heptane'	0.574495	2.25984	-2.30425	2.05511	0.537299	1.1855
								'piperazine / octanol'	-0.630928	-1.16917	-0.204429	-0.430664	0.911875	-0.634285
								'isobutanol / isobutanol'	-0.24592	-1.11856	-0.183397	0.60873	-0.617376	-1.448
								'butyl acetate / benzene'	1.35934	1.30134	0.883105	-0.184785	-0.373214	-0.864848
								'aniline / decalin'	0.29235	-1.29071	-0.845474	-0.812145	-0.284492	-0.646873
								'1-pentanol / butylacetate'	0.203593	-0.879945	-0.39573	-0.208991	-0.324779	-1.29143
								'o-cresol / hexadecane'	-0.215363	-2.29033	-2.54677	-1.3089	2.21781	0.310581
								'p-xylene / p-xylene'	0.831957	1.09613	0.0516323	0.0944495	0.983969	-0.788995
								'p-cresol / heptane'	0.725174	-1.21724	-2.42106	-0.201885	-1.20229	-0.396488
								'1-butanol / ethylacetate'	-0.298721	-0.763597	-0.331765	0.424252	-1.17282	-1.45235
								'dibutylether / dibutylether'	1.70981	1.56787	0.705776	-2.19654	-0.564182	-0.87239
								'1,1,1,3,3,3-hexafluoropropan- / octanol'	-0.000109878	-1.04073	-0.71366	0.287244	1.09548	0.214158
								'2-methylpyridine / 2-methylpyridine'	0.893745	-0.193034	1.01451	0.767085	0.0659923	0.371598
								'1-heptanol / hexane'	1.07469	0.218207	-1.1371	-0.994499	-1.34031	-1.77066
								'methyl hexanoate / cyclohexane'	1.61731	1.59806	0.184681	-0.631753	-0.658621	-0.876301
								'gama-Picoline / acetonitrile'	1.54508	0.135983	1.18521	0.924281	-2.9911	1.58576
								'butyl acetate / chlorobenzene'	1.58378	0.737778	1.44299	-0.432086	0.413915	-0.130566
								'acetic acid / diisopropylether'	-1.77759	-0.788759	-1.88268	1.72028	-0.94802	-0.960985
								'1-hexanol / iodobenzene'	1.21224	-0.925533	1.78342	-1.04646	2.19339	-0.983407
								'methyl pentanoate / carbontet'	0.93908	1.4373	0.454984	-0.38087	-0.159282	-0.931798
								'pentanoic acid / xylene (mixed isomers)'	0.387887	-0.587159	-0.501765	0.720196	1.65962	-1.6737
								'1-butanol / octanol'	-0.712458	-1.54554	-0.281137	-0.364675	0.908163	-0.867285
								'benzaldehyde / cyclohexane'	0.685315	0.729028	-0.79939	0.514428	-1.18268	0.66894
								'm-xylene / carbontet'	0.871491	1.31854	-0.181996	0.455313	0.500153	-1.12458
								'2-methylpyridine / 2methylpyridine'	0.799363	-0.103453	0.964272	0.706549	0.0747481	0.289741
								'1-hexanol / odichlorobenzene'	1.34728	-1.11563	1.46092	-0.868627	1.38255	-0.669328
								'1-butanol / diethylether'	-0.546691	-0.308502	-0.874193	0.378058	-2.07381	-1.6824
								'1,4-dichlorobenzene / hexane'	0.657633	2.40685	-2.40006	2.28352	0.0825025	0.99219
								'2-octanone / heptane'	1.85517	1.05098	-1.03557	-1.17843	-1.49076	0.178758
								'1-Propanol / DMSO'	0.555167	-1.63627	3.77004	0.219287	-1.0661	1.21051
								'1-hexanol / ethylbenzene'	0.82513	-0.427965	0.336142	-0.846118	0.284412	-1.38231
								'1,4-dichlorobenzene / octanol'	1.07531	0.932955	-1.77033	2.47954	2.79532	1.27406
								'm-xylene / heptane'	0.398332	1.37828	-1.11763	-0.0805793	-0.423299	-0.585229
								'ethylbenzene / ethylbenzene'	0.653509	1.28811	0.177471	0.563841	1.1989	-0.584007
								'phenol / pentane'	-0.0464404	-0.986183	-2.62604	0.624317	-2.1744	-0.705423
								'ethylbenzene / carbontet'	0.559339	1.63018	-0.188871	0.865561	0.794601	-1.10773
								'methyl i-propyl ketone / methyl i-propyl ketone'	0.890326	-0.273136	0.0916685	0.527952	-1.70573	0.884294
								'diethyl carbonate / diethyl carbonate'	0.304774	1.41097	0.436161	-0.0877274	0.240898	-1.34876
								'chlorobenzene / chlorobenzene'	0.701774	1.27954	0.263705	1.95214	1.27164	1.46768
								'nitromethane / DMSO'	0.319792	-1.50069	2.10717	2.76594	0.845432	2.09404
								'nitromethane / dimethylformamide'	-0.0779188	-1.14056	1.0108	2.7191	0.0506431	1.74477
								'thioanisole / carbontet'	1.76084	0.534049	-0.66199	-0.0784312	-0.668241	0.379434
								'1,1,1-trichloroethane / 1,1,1-trichloroethane'	0.72346	1.50623	-0.985528	2.74309	0.0626731	2.33851
								'ethyl phenyl ether / octanol'	1.48235	-0.485157	-0.402562	-0.760169	0.56954	0.356412
								'methyl pentanoate / toluene'	1.12035	1.25884	0.862317	-0.473051	-0.0507704	-0.63387
								'ethyl phenyl ether / hexadecane'	0.226323	-0.275496	-1.06888	-2.42709	1.57867	1.11921
								'methyl hexanoate / hexane'	1.27926	1.74872	-0.652051	-0.821394	-1.35762	-0.821127
								'methyl hexanoate / heptane'	1.19613	1.60171	-0.556236	-1.0498	-0.902824	-0.627818
								'n-octane / diethylether'	0.971602	2.93757	0.171161	0.644622	-0.132983	-2.98809
								'1-heptanol / pentane'	1.15298	0.37094	-1.30013	-0.722955	-1.83691	-2.0122
								'1-heptanol / decane'	0.821205	-0.383293	-0.931272	-1.61038	0.382846	-1.30441
								'nitromethane / acetonitrile'	-0.312184	-0.551265	0.147087	2.90137	-1.59674	1.48737
								'1-heptanol / nonane'	0.801315	-0.190169	-0.953999	-1.64218	-0.0823287	-1.23222
								'1-heptanol / hexadecane'	0.236332	-1.04602	-1.17368	-2.4654	2.38164	-0.726001
								'acetylacetone / acetylacetone'	1.11279	0.0588721	0.780957	0.358727	-0.424358	1.22529
								'methyl pentanoate / xylene (mixed isomers)'	0.942817	1.17476	0.989856	-0.66866	0.839023	-0.937517
								'2-methoxyethanol / nonanol'	-0.997898	-1.79248	-0.466104	-0.589094	0.88293	-0.144776
								'dipropyl sulfide / hexadecane'	0.583187	0.492519	-1.03883	-2.14329	1.82501	1.6843
								'thiophenol / hexadecane'	-0.704267	0.701805	-1.84575	-0.15145	2.84072	2.01533
								'gama-Picoline (4-methylpyridine) / methanol'	1.41014	-0.0802899	0.185357	2.07511	-1.89411	-0.125858
								'1-heptanol / heptane'	0.991553	0.071197	-1.04128	-1.22291	-0.885515	-1.57735
								'phenol / nonane'	-0.398106	-1.54729	-2.27992	-0.294903	-0.419822	0.0745506
								'2-hexanone / toluene'	1.17688	0.646428	0.487057	-0.53822	-0.797673	0.350491
								'p-cresol / isooctane'	0.532312	-1.10293	-2.48225	-0.541653	-1.3272	-0.111289
								'methyl pentanoate / perfluorobenzene'	0.66073	1.28895	-0.561061	-0.366425	-0.405263	-1.02281
								'butyl acetate / carbontet'	1.04318	1.30681	0.368638	-0.403259	-0.252507	-0.824308
								't-pentanol / t-pentanol'	0.33761	-1.00562	-0.66019	0.504173	-0.253549	-1.74418
								'nitroethane / nitroethane'	0.475969	-0.715046	0.540526	2.62415	-0.546727	1.47811
								'butyl acetate / bromobenzene'	1.55041	0.591792	1.71827	-0.617056	1.16341	-0.0456332
								'o-xylene / diethylether'	0.894247	1.20596	-1.18248	1.10006	-1.29324	-1.13273
								'butyl acetate / toluene'	1.22445	1.12834	0.77597	-0.49544	-0.143996	-0.52638
								'phenol / cyclohexane'	0.213318	-1.28958	-1.62628	0.542414	-0.978805	-0.519061
								'methyl pentanoate / ethylbenzene'	1.03325	1.09523	0.821325	-0.68259	0.245021	-0.408072
								'1-propanol / 1-propanol'	-0.668272	-1.24016	0.190441	0.977241	-1.08985	-1.18819
								'butylamine / pentanol'	-0.047232	-1.01961	0.538226	-0.787818	-1.02372	-0.619166
								'2-hexanone / perfluorobenzene'	0.717264	0.676535	-0.936321	-0.431594	-1.15217	-0.0384477
								'thioanisole / decalin'	1.44411	0.461101	-0.689059	-0.400956	0.359522	-0.0313876
								'n-octane / bromoethane'	1.35863	2.31844	2.4864	0.208218	3.1571	-2.58274
								'o-xylene / cyclohexane'	0.648855	1.29215	-0.382422	0.35095	-0.325086	-0.654652
								'benzonitrile / cyclohexane'	0.638572	0.533702	-0.589203	0.0914317	-1.50094	0.599077
								'formic acid / formic acid'	-0.213184	-2.36549	1.49841	2.61119	-2.22469	2.25345
								'2-nitropropane / 2-nitropropane'	0.955974	-0.37271	0.399394	2.0301	-0.596763	1.61082
								'tetrahydrothiophene / tetrahydrothiophene'	0.880546	0.175171	1.43414	0.703114	-0.565762	1.81627
								'nitroethane / nitroethane'	0.355807	-0.600997	0.47656	2.54708	-0.535579	1.3739
								'methyl hexanoate / octane'	1.09501	1.47381	-0.49715	-1.28485	-0.499547	-0.427934
								'benzaldehyde / hexane'	0.347268	0.879687	-1.63612	0.324787	-1.88168	0.724114
								'toluene / methylenechloride'	0.759625	0.950708	0.269544	1.72024	-0.308263	-1.05387
								'p-xylene / heptane'	0.3991	1.39116	-1.13807	-0.0485227	-0.336215	-0.678545
								'butyl acetate / butylacetate'	1.25198	0.611041	-0.0711621	-0.213674	-0.302023	-0.417881
								'2,4-dimethylpyridine / hexadecane'	-0.132496	-0.301428	-1.19272	-1.96621	1.77897	1.09821
								'butylamine / secbutanol'	0.0714931	-0.815285	0.427349	-0.477107	-1.61856	-0.904002
								'm-xylene / cyclohexane'	0.819518	1.37463	-0.376716	0.33747	-0.179095	-0.833712
								'propanoic acid / bromoethane'	-0.50429	-1.17579	0.422526	1.50215	1.9951	-1.02786
								'pentyl acetate / hexane'	1.39326	1.60866	-0.734699	-0.864381	-1.48993	-0.672147
								'butyl acetate / perfluorobenzene'	0.764833	1.15845	-0.647407	-0.388814	-0.498489	-0.915318
								'o-xylene / heptane'	0.227669	1.2958	-1.12334	-0.067099	-0.569289	-0.406169
								'pyridine / pyridine'	0.482876	-0.122637	1.62482	1.37984	-0.0012015	0.630893
								'2-butanol / 2-butanol'	-0.172878	-1.11511	-0.227541	0.698503	-0.675387	-1.41634
								'benzonitrile / hexadecane'	-0.537835	-0.57987	-1.46252	-1.56911	1.52201	1.69891
								'2,6-dimethylpyridine / cyclohexane'	0.65487	0.718221	-0.320777	-0.205352	-1.17247	-0.145602
								'methyl hexanoate / nonane'	1.00589	1.34035	-0.468954	-1.46907	-0.0996379	-0.28269
								'methyl hexanoate / decalin'	1.35256	1.46902	0.352331	-0.836434	1.04839	-1.57799
								'2-ethylpyrazine / octane'	0.0153263	0.933983	-1.3666	0.0464018	-0.122967	-0.0472277
								'pyrrole / chloroform'	-0.564008	-0.987378	-0.26544	0.628998	-1.48595	0.0189745
								'benzaldehyde / heptane'	0.264129	0.732677	-1.54031	0.0963795	-1.42688	0.917423
								'toluene / tetrahydrofuran'	0.701502	0.79761	0.0719585	1.6348	-0.207814	-0.994983
								'phenol / hexane'	-0.124729	-1.13892	-2.46301	0.352773	-1.67781	-0.463887
								'2-hexanone / xylene (mixed isomers)'	0.99935	0.562343	0.614596	-0.733829	0.0921205	0.0468429
								'anisole / carbontet'	0.708495	0.618282	-0.0168851	-0.397908	-0.831435	-0.124198
								'2-hexanone / ethylbenzene'	1.08978	0.482818	0.446066	-0.747759	-0.501881	0.576288
								'butyl acetate / ethylbenzene'	1.13735	0.964733	0.734979	-0.704979	0.151795	-0.300583
								'secbutanol / secbutanol'	-0.213503	-1.07655	-0.249167	0.672446	-0.671618	-1.45157
								'methyl hexanoate / decane'	1.02578	1.14722	-0.446226	-1.43727	0.365537	-0.354879
								'methyl propanoate / chloroform'	-0.0949087	1.02736	0.796648	0.469492	-0.759785	-0.564653
								'toluene / chloroform'	0.405572	1.0389	0.0906902	1.27701	0.136807	-1.01639
								'allyl alcohol / allyl alcohol'	-0.388754	-1.59307	-0.395144	1.95394	-0.585629	-0.921647
								'phenol / octane'	-0.308982	-1.41383	-2.30811	-0.11068	-0.819731	-0.0706939
								'2-heptanone / cyclohexane'	1.68372	0.994664	-0.182277	-0.708275	-1.41074	0.111297
								'methyl pentanoate / isopropylbenzene'	0.842028	1.07339	0.646378	-0.917831	0.395377	-0.296855
								'hydrogen peroxide / nitrobenzene'	-1.33984	-2.49588	1.76371	2.92822	2.14773	0.580514
								'g-butyrolactone / nitromethane'	0.966345	-0.759628	2.00701	0.904388	-2.24799	1.9738
								'ethylbenzene / diethylether'	0.752758	1.60008	-1.18365	1.49682	-0.8528	-1.29494
								'chlorobenzene / chloroform'	0.592877	1.66567	-0.586206	2.51771	0.30777	0.722667
								'1-pentanol / 1,2-Dichlorethane'	0.688969	-0.65129	0.728305	0.185168	-0.405183	-1.42118
								'tetrachloroethylene / tetrachloroethylene'	0.982063	3.45124	0.158505	1.57372	0.894184	3.60245
								'ethylbenzene / undecane'	-0.314423	1.19533	-1.04265	-0.470629	1.39113	0.0773329
								'1-pentanol / 1,2-Dibromoethane'	0.575249	-0.833401	1.36453	-0.203718	1.36742	-1.47972
								'benzaldehyde / hexadecane'	-0.491092	-0.384544	-1.67271	-1.14612	1.84027	1.76877
								'aniline / hexadecane'	-0.619302	-2.27524	-1.88644	-2.26801	1.03145	1.15465
								'pentyl acetate / decalin'	1.46656	1.32896	0.269682	-0.879421	0.916082	-1.42901
								'2-butanone / chloroform'	-0.171992	0.414735	0.417875	0.473077	-1.49344	0.43463
								'o-Xylene / acetonitrile'	2.07637	0.665098	1.14589	1.12885	-2.06142	0.664427
								'aniline / hexane'	0.219058	-1.01101	-1.84986	-0.797105	-2.6905	0.10999
								'methyl hexanoate / hexadecane'	0.440905	0.48449	-0.688639	-2.2923	2.36433	0.223534
								'2-hexanone / chlorohexane'	0.736892	0.55573	-0.269093	-0.935364	-0.95492	0.647091
								'chlorobenzene / diethylether'	0.354596	1.81847	-1.80542	2.61223	-1.04218	0.586729
								'nitromethane / nitromethane'	0.124513	-0.95026	0.973008	3.21662	-0.657197	1.55553
								'methyl pentanoate / chlorohexane'	0.680359	1.16814	0.106167	-0.870195	-0.208018	-0.337269
								'2-methoxyethanol / decanol'	-1.10609	-1.85363	-0.490795	-0.779437	1.12877	-0.00756039
								'methyl pentanoate / trimethylbenzene'	0.976815	0.881888	1.0037	-0.899783	0.884073	-0.21729
								'methyl pentanoate / tetrachloroethene'	0.996554	1.18886	0.993209	-0.611029	0.73193	-0.701426
								'1-heptanol / dodecane'	0.551552	-0.578946	-1.01228	-2.04909	1.01299	-0.94838
								'butyronitrile / butyronitrile'	0.0738613	-0.259611	1.43896	0.819323	-1.35667	0.659041
								'2-heptanone / pentane'	1.42396	1.29806	-1.18204	-0.626372	-2.60634	-0.0750653
								'butylamine / heptanol'	-0.312516	-1.21576	0.3952	-1.20282	-0.309694	-0.394281
								'butyl acetate / xylene (mixed isomers)'	1.04692	1.04426	0.90351	-0.691049	0.745797	-0.830028
								'methyl pentanoate / tbutylbenzene'	0.753775	0.978629	0.638349	-1.11539	0.617547	-0.102471
								'n-octane / tetrahydrofuran'	1.50581	2.54348	1.37165	0.907896	0.872348	-2.83075
								'2-hexanone / trimethylbenzene'	1.03335	0.269475	0.628442	-0.964952	0.13717	0.76707
								'2-hexanone / isopropylbenzene'	0.898561	0.460974	0.271119	-0.983	-0.351525	0.687505
								'tetrachloroethene / tetrachloroethene'	0.982027	3.45127	0.158486	1.5737	0.894187	3.60242
								'n-octane / carbontet'	0.778183	2.96766	1.16594	0.0133598	1.51442	-2.80088
								'toluene / carbondisulfide'	0.820822	1.44905	1.64535	1.44445	0.752917	-1.41987
								'phenol / decalin'	-0.0514373	-1.41861	-1.45863	0.337733	0.728206	-1.22075
								'n-octane / diisopropylether'	0.771833	2.80923	0.138338	0.260445	0.361855	-2.74406
								'aniline / heptane'	0.13592	-1.15802	-1.75404	-1.02551	-2.23571	0.303299
								'anisole / cyclohexane'	0.656522	0.674372	-0.211604	-0.515752	-1.51068	0.16667
								'nitromethane / nitromethane'	-0.000371434	-0.831729	0.906528	3.13652	-0.645612	1.44722
								'methyl pentanoate / butylbenzene'	0.708611	0.917691	0.592995	-1.14495	0.787066	-0.109494
								'Ethylbenzene / acetonitrile'	1.93488	1.05922	1.14472	1.52562	-1.62098	0.502214
								'2-heptanone / hexane'	1.34567	1.14532	-1.01901	-0.897917	-2.10974	0.16647
								'butyl acetate / isopropylbenzene'	0.94613	0.942889	0.560032	-0.94022	0.302152	-0.189366
								'pentyl acetate / octane'	1.20901	1.33375	-0.579799	-1.32783	-0.631855	-0.278954
								'n-octane / benzene'	1.09434	2.96219	1.68041	0.231834	1.39371	-2.84142
								'anisole / hexadecane'	-0.519885	-0.439199	-1.08492	-2.1763	1.51226	1.2665
								'anisole / heptane'	0.235337	0.678022	-0.952521	-0.933801	-1.75489	0.415152
								'butylamine / nonanol'	-0.610332	-1.37835	0.226021	-1.61362	0.379183	-0.188753
								'methyl hexanoate / pentadecane'	0.537095	0.577035	-0.640698	-2.15878	2.0759	0.133591
								'dipropylamine / xylene (mixed isomers)'	0.982807	0.0705295	0.947454	-1.53728	0.259889	-1.29733
								'butyl acetate / tetrachloroethene'	1.10066	1.05836	0.906863	-0.633418	0.638704	-0.593936
								'nitromethane / nitroethane'	-0.303909	-0.785537	0.408663	2.82998	-0.525221	1.43629
								'2-hexanone / mesitylene'	0.924631	1.13007	1.03202	-1.57722	-1.56287	1.37914
								'pyridine / octanol'	-0.755488	-0.448834	-0.411279	0.462895	0.803053	0.694456
								'1-pentanol / bromoform'	0.455336	-0.857108	2.01421	-0.71515	2.28918	-1.04867
								'2-heptanone / tetralin'	1.77768	0.209696	0.884842	-1.2218	1.04627	0.569401
								'methyl pentanoate / isopropyltoluene'	0.681147	1.19569	0.774932	-1.31211	0.370763	-0.00167943
								'pyridine / 4methyl2pentanone'	-0.271328	-0.005408	-0.130348	0.918748	-0.975478	0.759556
								'methyl pentanoate / fluorooctane'	0.418911	1.10035	-0.486322	-0.977127	-0.136938	-0.390615
								'phenol / heptane'	-0.207868	-1.28593	-2.3672	0.124365	-1.22301	-0.270578
								'pyridine / butylacetate'	-0.574347	0.122543	-0.449358	0.763952	-0.581029	0.472974
								'1-hexanol / cyclohexane'	0.678987	-0.0298009	-0.224918	-0.662242	-0.799139	-1.61516
								'pentyl acetate / decane'	1.13978	1.00716	-0.528875	-1.48026	0.233229	-0.205899
								'butanoic acid / benzene'	-0.0354904	-0.426244	-0.452897	1.38166	0.400517	-1.51412
								'acetic acid / aceticacid'	-0.95188	-1.30281	-0.631804	2.50462	-0.19913	-1.00672
								'butanoic acid / xylene (mixed isomers)'	-0.347906	-0.683321	-0.432493	0.875395	1.51953	-1.4793
								'diethylamine / pentanol'	-0.0706338	-0.804692	0.357198	-0.391278	-0.736795	-0.498739
								'propanoic acid / onitrotoluene'	0.0326847	-2.04565	1.33694	1.06191	1.7903	0.707526
								'1-propanol / propanol'	-0.72802	-1.18345	0.158636	0.938919	-1.08431	-1.24
								'2-pentanone / chlorobenzene'	0.661776	0.122393	1.18959	-0.229396	-0.363031	0.957112
								'1-butanol / chloroform'	-0.308411	-0.461297	0.345024	0.283538	-0.723853	-1.54647
								'pyrrole / octanol'	-0.968055	-2.07163	-0.8916	-0.0192151	0.146067	0.698156
								'butyl acetate / butylbenzene'	0.812713	0.787193	0.506648	-1.16734	0.69384	-0.00200484
								'm-Xylene / acetonitrile'	2.24703	0.747571	1.15159	1.11537	-1.91543	0.485367
								'nitromethane / tetrahydrothiophenedioxide'	-0.32892	-1.08425	5.23763	1.7915	4.54803	-0.0839526
								'allyl alcohol / octanol'	-1.26362	-2.06178	-1.12951	0.751817	1.13644	-0.361346
								'toluene / fluorobenzene'	0.456437	0.88546	0.26963	1.04073	0.166183	-0.616445
								'2-hexanone / tbutylbenzene'	0.810308	0.366217	0.26309	-1.18056	-0.129355	0.881889
								'p-Xylene / acetonitrile'	2.2478	0.760451	1.13116	1.14743	-1.82834	0.392051
								'2,6-dimethylpyridine / hexadecane'	-0.521538	-0.39535	-1.1941	-1.8659	1.85048	0.954233
								'3,3-dimethylbutanone / perfluorobenzene'	0.609754	0.510913	-1.05234	-0.343573	-1.19477	0.0405852
								'cyclopentanone / carbontet'	-0.24305	0.446968	0.0134183	-0.102034	-1.25443	0.578464
								'1-nitropropane / toluene'	-0.306141	0.977102	0.0870184	1.14334	-0.081835	0.717639
								'3,3-dimethylbutanone / chlorobenzene'	1.4287	0.090241	1.03806	-0.386844	-0.282368	0.825338
								'ethylbenzene / decane'	-0.0841671	1.23543	-1.0145	-0.0578039	1.13951	-0.295443
								'1-pentanol / chlorobenzene'	0.535396	-0.753209	1.11842	-0.427403	0.391159	-1.00411
								'2-heptanone / octane'	1.16142	0.870414	-0.864108	-1.36137	-1.25167	0.559663
								'n-octane / chloroform'	1.20988	2.78477	1.39038	0.550102	1.21697	-2.85215
								'butyl acetate / tbutylbenzene'	0.857877	0.848132	0.552003	-1.13778	0.524322	0.00501789
								'ethanol / DMSO'	-0.264021	-2.39396	3.05441	1.00532	0.274081	0.584374
								'1-fluorooctane / hexadecane'	0.10013	1.72712	0.161742	-2.35647	2.95862	-0.43497
								'm-xylene / octanol'	0.899143	0.0513946	-0.583717	0.343842	1.83472	-0.496671
								'ethanol / aceticacid'	-1.40526	-1.11591	0.465608	1.1524	-1.05122	-1.1218
								'n-octane / dibutylether'	0.583138	2.46849	0.461332	-0.319108	1.45283	-2.19785
								'butanoic acid / toluene'	-0.170374	-0.599236	-0.560032	1.071	0.629734	-1.17565
								'm-xylene / hexadecane'	-0.356889	0.261056	-1.25004	-1.32307	2.84385	0.266122
								'p-xylene / hexadecane'	-0.356122	0.273936	-1.27047	-1.29102	2.93094	0.172807
								'dipropylamine / toluene'	1.16034	0.154615	0.819914	-1.34167	-0.629904	-0.993681
								'pentanoic acid / heptane'	-0.0890088	-0.26487	-1.97227	0.472094	-0.262141	-1.12863
								'4-methylpyridine / cyclohexane'	0.117568	0.763039	-0.343097	0.146376	-1.25477	0.26668
								'diethylamine / chloroform'	-0.067887	-0.00905288	0.743498	-0.327001	-1.28666	-0.901466
								'ethanol / dimethylformamide'	-0.661732	-2.03383	1.95804	0.958475	-0.520708	0.235111
								'toluene / diethylether'	0.167291	1.19169	-1.12853	1.37153	-1.21315	-1.15232
								'1-butanol / butylacetate'	-0.531317	-0.974168	-0.319216	-0.063619	-0.47592	-1.08877
								'butylamine / decanol'	-0.71852	-1.4395	0.20133	-1.80396	0.62502	-0.0515367
								'o-xylene / hexane'	0.310808	1.44281	-1.21915	0.161308	-1.02409	-0.599478
								'butyl acetate / fluorooctane'	0.523014	0.969852	-0.572668	-0.999515	-0.230163	-0.283126
								'butyl acetate / secbutylbenzene'	0.995519	0.771357	1.06913	-1.20077	0.84096	0.223712
								'di-i-propyl sulfide / di-i-propyl sulfide'	1.97386	0.934659	-0.050334	-0.401395	-0.754408	1.08036
								'propyl acetate / benzene'	0.623615	1.1987	0.95446	-0.0391326	-0.534753	-0.647785
								'chlorobenzene / carbontet'	0.161177	1.84857	-0.810646	1.98096	0.605218	0.773939
								'Butanol / acetonitrile'	0.635434	-0.849368	1.45417	0.406857	-2.84198	0.114753
								'pentyl acetate / hexadecane'	0.554904	0.34443	-0.771287	-2.33528	2.23202	0.372514
								'4-heptanone / hexadecane'	0.300445	-0.0755779	-0.983504	-2.36334	1.56013	1.2705
								'p-xylene / octanol'	0.899911	0.0642744	-0.604153	0.375899	1.9218	-0.589986
								'toluene / chlorobenzene'	0.514469	0.652765	0.940602	0.711441	1.10068	-0.271371
								'n-octane / methylenechloride'	1.56394	2.69658	1.56923	0.993332	0.7719	-2.88964
								'2-heptanone / decane'	1.09218	0.543824	-0.813184	-1.5138	-0.386584	0.632719
								'pentyl acetate / pentadecane'	0.651094	0.436975	-0.723347	-2.20177	1.94359	0.282571
								'1-pentanol / toluene'	0.176068	-0.362643	0.451402	-0.490758	-0.166752	-1.39993
								'toluene / toluene'	0.173587	1.02582	0.283402	0.659918	0.541055	-0.651188
								'n-octane / chlorobenzene'	1.31878	2.39864	2.24029	-0.0154669	2.18084	-2.10714
								'piperidine / xylene (mixed isomers)'	-0.38512	-0.247025	0.767147	-0.871568	0.216995	-0.943398
								'chlorobenzene / heptane'	-0.311981	1.90831	-1.74628	1.44507	-0.318234	1.31329
								'ethylbenzene / hexadecane'	-0.669041	0.572703	-1.25691	-0.912827	3.1383	0.28297
								'butylamine / benzylalcohol'	0.357739	-1.3698	2.22905	-1.05955	0.753798	-0.283993
								'diethylamine / butanol'	0.0928149	-0.727601	0.448138	-0.131996	-1.09454	-0.629174
								'phenol / hexadecane'	-0.963089	-2.40315	-2.4996	-1.11813	2.04414	0.580774
								'chlorobenzene / hexane'	-0.228843	2.05532	-1.8421	1.67348	-0.773031	1.11998
								'3-methylpyridine / cyclohexane'	0.0961405	0.788888	-0.357064	0.17179	-1.24706	0.303421
								'1-hexanol / hexane'	0.340939	0.120859	-1.06165	-0.851884	-1.49814	-1.55999
								'piperidine / piperidine'	0.184527	-0.513798	0.658967	-0.0481949	-0.596916	-0.881508
								'pyridine / toluene'	-0.601873	0.639845	0.397774	0.482186	-0.423003	0.364475
								'methyl pentanoate / octanol'	0.966733	0.170162	0.053263	-0.492341	1.17529	-0.303889
								'2-heptanone / hexadecane'	0.507309	-0.118907	-1.0556	-2.36882	1.61221	1.21113
								'2-butanone / bromoethane'	-0.023242	-0.0515905	1.5139	0.131194	0.446691	0.704041
								'chlorobenzene / undecane'	-0.712585	1.41371	-1.66442	0.644773	1.20175	1.959
								'propanoic acid / 1,2-Dichlorethane'	-0.390571	-0.993678	-0.2137	1.89104	0.222491	-0.969325
								'ethanol / methylformamide'	0.751056	-2.99849	6.10127	-0.209499	-3.36326	4.94352
								'm-xylene / isooctane'	0.20547	1.49258	-1.17883	-0.420347	-0.548204	-0.30003
								'toluene / toluene'	0.155141	1.04333	0.273583	0.648087	0.542766	-0.667186
								'toluene / carbontet'	-0.0261278	1.22179	-0.13375	0.740268	0.434255	-0.965114
								'2-methylpyrazine / dibutylether'	-0.440257	0.237645	-1.25177	0.770135	0.255268	-0.0453646
								'2-methoxyethanol / diethylether'	-0.670332	-0.485304	-0.986816	0.395501	-2.41979	-1.11385
								'phosphorus oxychloride / phosphorus oxychloride'	1.16303	2.40802	0.730297	1.74252	-0.059634	3.97899
								'propionitrile / propionitrile'	-0.568791	-0.276355	1.52789	1.2633	-1.79153	0.72107
								'nitromethane / aniline'	-0.611527	-0.666315	1.25833	2.32006	2.04552	0.7358
								'nitromethane / pyridine'	-0.494716	-0.377273	0.865638	2.61016	0.465242	0.837113
								'nitromethane / methylformamide'	1.33487	-2.10522	5.15403	1.55113	-2.79191	6.45319
								'butyl acetate / bromooctane'	0.490537	0.694578	0.0997018	-1.41438	1.03624	0.0851144
								'toluene / pyridine'	1.11996	0.394674	1.43679	1.46883	0.975693	-0.504777
								'chlorobenzene / cyclohexane'	0.109205	1.90466	-1.00537	1.86312	-0.07403	1.06481
								'1-pentanol / benzene'	0.310952	-0.189651	0.558537	-0.180103	-0.39597	-1.7384
								'nitromethane / tetrahydrofuran'	-0.913178	0.0256624	-0.499195	2.77614	-0.718266	0.346908
								'2-propanol / 2-propanol'	-0.782007	-1.08718	-0.135538	1.07024	-1.30147	-1.32723
								'ethylbenzene / octanol'	0.586992	0.363042	-0.590592	0.75409	2.12917	-0.479823
								'ethanol / ethanol'	-1.24107	-1.24668	0.293058	1.51078	-1.62776	-1.13867
								'o-xylene / octanol'	0.72848	-0.0310789	-0.589424	0.357322	1.68873	-0.31761
								'1-pentanol / bromobenzene'	0.502023	-0.899195	1.39371	-0.612374	1.14065	-0.919181
								'toluene / xylene (mixed isomers)'	-0.0223907	0.959245	0.401123	0.452478	1.43256	-0.970833
								'toluene / 2methylpyridine'	0.805593	0.423411	0.937623	1.17353	1.00348	-0.473162
								'nitromethane / methoxyethanol'	-0.665927	-0.723333	-0.401713	3.09828	0.305791	0.332593
								'nitromethane / ethylacetate'	-1.19942	-0.0353481	-1.15725	2.55906	-0.822613	0.419622
								'propyl acetate / perfluorobenzene'	0.0291129	1.05581	-0.576053	-0.243161	-0.660028	-0.698255
								'toluene / ethylacetate'	0.415261	0.7366	-0.586099	1.41772	-0.312161	-0.922269
								'nitromethane / methylenechloride'	-0.855055	0.17876	-0.301609	2.86157	-0.818715	0.288017
								'nitromethane / benzonitrile'	-0.318398	-1.14948	1.36392	2.1002	1.11485	2.02621
								'butanoic acid / heptane'	-0.824801	-0.361032	-1.903	0.627292	-0.402229	-0.934226
								'toluene / cyclohexanone'	0.968656	0.0184116	1.00176	1.14157	0.980755	0.0574239
								'2-pentanone / 2-pentanone'	0.928887	-0.308198	0.172668	0.482734	-1.54697	0.951826
								'ethanol / ethanol'	-1.29258	-1.19779	0.265638	1.47774	-1.62298	-1.18335
								'propylamine / butanol'	-0.605699	-1.03286	0.69113	-0.372599	-1.55567	-0.487389
								'methyl pentanoate / cyclohexane'	0.887108	1.49339	0.260265	-0.498714	-0.83853	-0.64093
								'1-hexanol / carbontet'	0.730959	-0.0858908	-0.0301992	-0.544399	-0.119891	-1.90603
								'1,4-dioxane / dimethylformamide'	0.253237	-0.00271741	3.17576	-0.0540819	-0.69734	0.64325
								'piperidine / benzene'	-0.0727044	0.0100522	0.746742	-0.365304	-0.902016	-0.978219
								'toluene / dimethylpyridine'	0.496541	0.474244	0.559743	0.859744	1.12259	-0.442123
								'3-pentanone / 3-pentanone'	0.927552	-0.163462	0.422862	0.338982	-1.78833	1.10977
								'1-propanol / octanol'	-1.45246	-1.63751	-0.210285	-0.203999	0.771398	-0.67363
								'n-octane / bromobenzene'	1.28541	2.25265	2.51557	-0.200437	2.93033	-2.0222
								'2-pentanone / toluene'	0.302448	0.512959	0.522567	-0.29275	-0.920942	0.561298
								'propyl acetate / propyl acetate'	0.753958	0.495991	0.0606158	0.233089	-0.835489	-0.254677
								'ethanol / 2methylpyridine'	-1.3929	-1.24181	1.31371	0.554241	-0.0783228	-0.640933
								'1,4-dioxane / dimethylacetamide'	0.0947028	-0.037295	2.91126	-0.22277	-0.647344	0.704343
								'ethanol / propanol'	-1.47253	-1.25651	0.209536	1.15242	-1.16869	-1.07135
								'cyclopentanone / octanol'	-0.215397	-0.820175	-0.388302	-0.213506	0.0801339	1.20637
								't-butanol / t-butanol'	-0.244594	-1.01581	-0.586191	0.826023	-0.966888	-1.56535
								'3,3-dimethylbutanone / toluene'	1.06937	0.480807	0.371039	-0.450199	-0.840279	0.429523
								'propyl acetate / toluene'	0.488731	1.02571	0.847325	-0.349787	-0.305536	-0.309317
								'anisole / decalin'	0.391767	0.545334	-0.0439544	-0.720433	0.196328	-0.53502
								'n-octane / fluorobenzene'	1.26075	2.63133	1.56932	0.313818	1.24635	-2.45221
								'toluene / iodobenzene'	0.455156	0.382153	1.67987	0.238205	2.74753	-0.0424902
								'toluene / ethoxybenzene'	0.125316	0.530231	0.501674	0.242999	1.41397	0.00955622
								'm-xylene / hexane'	0.481471	1.52529	-1.21345	0.147828	-0.878096	-0.778539
								'chlorobenzene / hexadecane'	-1.0672	0.791088	-1.87868	0.202575	2.94892	2.16464
								'ethylbenzene / hexane'	0.169319	1.83693	-1.22032	0.558076	-0.583648	-0.761691
								'3,3-dimethylbutanone / chlorohexane'	0.629382	0.390108	-0.385111	-0.847343	-0.997527	0.726124
								'toluene / triethylamine'	-0.0214974	1.03739	-0.842964	0.900572	-0.238716	-0.95163
								'1-hexanol / nonane'	0.0675625	-0.287517	-0.878553	-1.49956	-0.240156	-1.02155
								'ethylbenzene / cyclohexane'	0.507366	1.68627	-0.38359	0.747717	0.115353	-0.816865
								'1-hexanol / pentane'	0.419228	0.273591	-1.22468	-0.580339	-1.99474	-1.80152
								'1-hexanol / decane'	0.0874534	-0.480641	-0.855825	-1.46776	0.225019	-1.09374
								'trichloroethylene / trichloroethylene'	0.659823	1.28206	-1.03476	2.81678	0.587396	2.3339
								'ethyl propanoate / ethyl propanoate'	0.756189	0.52044	0.116771	0.136701	-1.00363	-0.149298
								'dipropylamine / diethylether'	1.17249	0.302979	-0.582196	-0.618224	-2.38582	-1.47882
								'methyl pentanoate / pentane'	0.627349	1.79679	-0.739498	-0.416811	-2.03413	-0.827292
								'butyl acetate / octanol'	1.07084	0.0396646	-0.0330832	-0.51473	1.08206	-0.196399
								'toluene / anisole'	0.46706	0.546306	0.863759	0.710465	1.39061	-0.353696
								'toluene / benzonitrile'	1.29628	-0.377528	1.93507	0.958873	1.6253	0.684318
								'propyl acetate / ethylbenzene'	0.401633	0.862096	0.806334	-0.559326	-0.0097444	-0.0835195
								'butyl acetate / cyclohexane'	0.99121	1.3629	0.173918	-0.521103	-0.931756	-0.533441
								'methyl pentanoate / hexane'	0.54906	1.64405	-0.576467	-0.688355	-1.53753	-0.585756
								'propyl acetate / bromobenzene'	0.814686	0.489154	1.78963	-0.471404	1.00187	0.17143
								'ethyl acetate / 1,2-Dichlorethane'	0.258876	0.639469	1.19532	0.480049	-0.684023	-0.139506
								'1-pentanol / odichlorobenzene'	0.611123	-1.21392	1.53519	-0.722805	1.22717	-0.461154
								'butanoic acid / isopropylbenzene'	-0.448695	-0.78469	-0.77597	0.626224	1.07588	-0.838634
								'chlorobenzene / decane'	-0.482329	1.45382	-1.63627	1.0576	0.950128	1.58623
								'1-hexanol / hexadecane'	-0.49742	-1.14337	-1.09824	-2.32279	2.22381	-0.515328
								'methyl pentanoate / heptane'	0.465922	1.49704	-0.480652	-0.916763	-1.08273	-0.392447
								'nitromethane / acetophenone'	-0.64552	-0.933374	1.06046	1.92248	1.45209	1.66506
								'1,4-dioxane / methoxyethanol'	-0.334771	0.41451	1.76325	0.3251	-0.442193	-0.768929
								'3-methylpyridine / hexadecane'	-1.08027	-0.324683	-1.23038	-1.48875	1.77588	1.40326
								'3,3-dimethylbutanone / xylene (mixed isomers)'	0.891841	0.396721	0.498579	-0.645808	0.0495138	0.125876
								'toluene / diisopropylether'	-0.0324776	1.06336	-1.16135	0.987353	-0.718307	-0.908294
								'nitromethane / nitrobenzene'	0.14125	-1.4811	1.95247	2.55579	1.63146	1.78305
								'toluene / acetophenone'	0.96916	-0.161426	1.63161	0.781148	1.96255	0.323174
								'1-propanol / diethylether'	-1.28669	-0.400464	-0.803341	0.538734	-2.21057	-1.48875
								'1,4-dioxane / DMSO'	0.650948	-0.362848	4.27213	-0.00723814	0.0974484	0.992513
								'toluene / cyclohexane'	-0.0781002	1.27788	-0.328469	0.622424	-0.244993	-0.674246
								'1-hexanol / heptane'	0.257801	-0.0261513	-0.965835	-1.08029	-1.04334	-1.36668
								'4-methylpyridine / hexadecane'	-1.05884	-0.350533	-1.21642	-1.51417	1.76818	1.36651
								'acetic acid / 1,2-Dichlorethane'	-1.07707	-1.09743	-0.17084	2.05694	0.0746229	-0.741129
								'acetonitrile / acetonitrile'	-1.17289	-0.367815	1.82656	1.72065	-2.14842	0.825969
								'propylamine / pentanol'	-0.769148	-1.10995	0.60019	-0.631881	-1.19792	-0.356955
								'nitromethane / aceticacid'	-0.821447	-0.222644	-0.48163	2.91302	-0.479869	0.387864
								'butyl acetate / pentane'	0.731451	1.66629	-0.825844	-0.4392	-2.12735	-0.719802
								'2-butanone / aniline'	0.42559	-0.518531	2.15667	0.374794	0.925722	0.844926
								'methyl propanoate / 1,2-Dichlorethane'	0.167561	0.743146	1.25644	0.516494	-0.592257	-0.236705
								'allyl alcohol / diethylether'	-1.09785	-0.824741	-1.72257	1.49455	-1.84552	-1.17647
								'2-pentanone / xylene (mixed isomers)'	0.124916	0.428873	0.650106	-0.488359	-0.0311491	0.25765
								'toluene / dibutylether'	-0.221173	0.722615	-0.838356	0.4078	0.372671	-0.362083
								'1,4-dioxane / methylformamide'	1.66603	-0.967376	7.319	-1.22206	-3.5399	5.35166
								'1-hexanol / octane'	0.156686	-0.154051	-0.906749	-1.31534	-0.640065	-1.1668
								'diethylamine / isobutanol'	0.0421851	-0.642933	0.282753	-0.123581	-1.31027	-0.694311
								'methyl pentanoate / octane'	0.364807	1.36914	-0.421566	-1.15181	-0.679456	-0.192563
								'toluene / Diphenylether'	0.07729	0.0251314	1.09164	-0.14289	3.24106	0.190676
								'methanol / methanol'	-1.66372	-1.41549	0.629899	2.15599	-2.06895	-1.03834
								'methyl pentanoate / nonane'	0.275683	1.23568	-0.39337	-1.33603	-0.279547	-0.0473185
								'2-pentanone / ethylbenzene'	0.215349	0.349349	0.481576	-0.502289	-0.625151	0.787095
								'pyrrolidine / pyrrolidine'	-0.0725418	-0.569352	0.912509	0.450488	-1.05769	-0.68226
								'ethanol / benzylalcohol'	-1.3907	-1.77216	1.7713	0.321706	1.38239	-0.446258
								'ethanol / isopropanol'	-1.55856	-1.14175	-0.0955698	1.18149	-1.41548	-1.22859
								'propyl acetate / chlorohexane'	0.0487414	0.935007	0.0911748	-0.746932	-0.462783	-0.0127162
								'2-pentanone / chlorohexane'	-0.137542	0.42226	-0.233583	-0.689894	-1.07819	0.857899
								'2-pentanone / isopropylbenzene'	0.0241267	0.327504	0.306629	-0.73753	-0.474795	0.898312
								'dimethyl disulfide / hexadecane'	-0.753731	-0.344981	-1.64429	-1.33093	1.23286	3.02899
								'aniline / octane'	0.0348051	-1.28592	-1.69495	-1.26056	-1.83243	0.503183
								'butyl acetate / heptane'	0.570024	1.36655	-0.566998	-0.939151	-1.17596	-0.284958
								'2-pentanone / trimethylbenzene'	0.158914	0.136006	0.663952	-0.719482	0.0139008	0.977877
								'methyl pentanoate / decalin'	0.622352	1.36436	0.427914	-0.703395	0.868481	-1.34262
								'chlorobenzene / decanol'	-0.0811578	0.450144	-1.3094	1.43729	2.50638	1.69302
								'toluene / octane'	-0.600401	1.15363	-1.0103	-0.0306697	-0.0859192	-0.225879
								'toluene / undecane'	-0.899889	0.786936	-0.987525	-0.595922	1.03078	0.219951
								'3,3-dimethylbutanone / isopropylbenzene'	0.791051	0.295352	0.155101	-0.894978	-0.394132	0.766538
								'pyridine / diethylether'	-0.589722	0.788209	-1.00434	1.20563	-2.17892	-0.120664
								'2,2,2-trifluoroethanol / octanol'	-1.55642	-1.27028	-0.36576	0.368016	1.10433	-0.335954
								'2-pentanone / carbontet'	0.121179	0.691423	0.115234	-0.200569	-1.02945	0.26337
								'N,N-dimethylacetamide / heptane'	-0.268676	0.567195	-0.143955	-2.05778	-3.24245	1.49696
								'3,3-dimethylbutanone / trimethylbenzene'	0.925838	0.103854	0.512424	-0.876931	0.0945636	0.846103
								'2-butanone / aceticacid'	0.215669	-0.0748604	0.416707	0.967759	-1.59967	0.49699
								'propylamine / heptanol'	-1.03443	-1.30611	0.457164	-1.04689	-0.483895	-0.13207
								't-butanol / diethylether'	-0.576138	-0.356083	-1.00829	0.553987	-2.00462	-1.6372
								'propyl acetate / tetrachloroethene'	0.364937	0.955726	0.978217	-0.487766	0.477165	-0.376873
								'butyl acetate / octane'	0.46891	1.23865	-0.507913	-1.1742	-0.772682	-0.0850737
								'3,3-dimethylbutanone / tbutylbenzene'	0.702798	0.200595	0.147072	-1.09254	-0.171962	0.960921
								'2-hexanone / pentane'	0.683882	1.18437	-1.11476	-0.48198	-2.78103	0.157068
								't-butanol / octanol'	-0.741904	-1.59313	-0.415231	-0.188746	0.977349	-0.822083
								'toluene / heptane'	-0.499286	1.28153	-1.06939	0.204375	-0.489196	-0.425763
								'3,3-dimethylbutanone / butylbenzene'	0.657634	0.139656	0.101717	-1.1221	-0.00244335	0.953899
								'2-hexanone / cyclohexane'	0.943641	0.880982	-0.114995	-0.563883	-1.58543	0.34343
								'propylamine / octanol'	-1.17045	-1.39856	0.360329	-1.21582	-0.115771	-0.0805005
								'3,3-dimethylbutanone / mesitylene'	0.817121	0.964445	0.915998	-1.4892	-1.60548	1.45818
								'propanoic acid / benzene'	-0.768587	-0.532039	-0.383469	1.52577	0.231705	-1.28654
								'diethylamine / octanol'	-0.471934	-1.0933	0.117337	-0.975214	0.345352	-0.222285
								'acetic acid / chloroform'	-1.33954	-0.813219	-0.630636	2.00994	-0.0929056	-1.06908
								'methanol / butanol'	-2.35863	-1.4866	0.194974	1.04801	-0.855668	-0.755562
								'2-butanone / nitroethane'	0.733208	-0.637753	1.307	0.884721	-1.64502	1.54542
								'2-butanone / acetonitrile'	0.724932	-0.403481	1.04542	0.956108	-2.71654	1.59649
								'1-pentanol / carbontet'	-0.00520068	-0.184179	0.0440697	-0.398577	-0.275263	-1.69786
								'diethyl sulfide / diethyl sulfide'	0.846328	0.802348	0.295767	0.263838	-1.31793	1.20091
								'1-butanol / bromoform'	-0.279574	-0.951331	2.09072	-0.569777	2.13804	-0.846008
								'n-octane / ethylacetate'	1.21957	2.48247	0.713589	0.690816	0.768001	-2.75803
								'1-pentanol / xylene (mixed isomers)'	-0.00146358	-0.446729	0.578942	-0.686367	0.723041	-1.70358
								'propyl acetate / tbutylbenzene'	0.122158	0.745494	0.623358	-0.992126	0.362782	0.222081
								'propanoic acid / xylene (mixed isomers)'	-1.081	-0.789117	-0.363064	1.01951	1.35072	-1.25172
								'2-pentanone / tbutylbenzene'	-0.0641259	0.232747	0.2986	-0.935088	-0.252625	1.0927
								'2-hexanone / isooctane'	0.329593	0.998935	-0.917108	-1.3217	-1.95454	0.877112
								'n-octane / iodobenzene'	1.25947	2.12802	2.97956	-0.488703	3.8277	-1.87826
								'2-butanone / nitromethane'	1.03674	-0.683945	1.80487	1.19126	-1.76541	1.55635
								'hydrogen peroxide / chloroform'	-2.69019	-0.747822	-0.669219	2.79078	0.142627	-0.877034
								'g-butyrolactone / toluene'	-0.492823	0.343484	0.802914	-0.442714	-1.57007	1.20128
								'2-methylpyrazine / octane'	-0.819485	0.668664	-1.42372	0.331664	-0.203322	0.0908394
								'methyl pentanoate / hexadecane'	-0.289299	0.379823	-0.613055	-2.15926	2.18442	0.458905
								'dichloroethane(1,2) / 1,2-Dichlorethane'	-0.0691434	1.06406	0.194532	2.3173	-0.220329	1.6868
								'toluene / isooctane'	-0.692148	1.39584	-1.13058	-0.135393	-0.614102	-0.140564
								'1-nitrobutane / hexadecane'	-0.731232	-0.236784	-1.83132	-0.528597	2.47015	1.38988
								'propylamine / nonanol'	-1.33225	-1.46869	0.287985	-1.45768	0.204982	0.0734583
								'pyridine / dibutylether'	-0.978186	0.319129	-0.714165	0.241899	-0.593098	0.669577
								'toluene / decane'	-0.669634	0.827045	-0.959376	-0.183097	0.779165	-0.152824
								'1-Propanol / acetonitrile'	-0.10457	-0.94133	1.52503	0.567533	-2.97875	0.308407
								'2-hexanone / tetralin'	1.0376	0.0960139	0.952124	-1.07741	0.871576	0.801535
								'n-octane / butanone'	1.6165	2.23995	1.29125	0.803679	0.466943	-2.25975
								'1-nitrobutane / hexane'	0.107127	1.02745	-1.79473	0.942306	-1.2518	0.345219
								'benzene / chloroform'	-0.834619	1.9134	-0.0742576	2.82105	1.20597	-0.974688
								'fluorobenzene / fluorobenzene'	-0.0597258	1.01247	0.264117	1.35668	-0.165939	0.306341
								'tetrachloroethene / undecane'	0.0507912	3.26486	-1.23351	0.467667	0.599503	4.55712
								'propyl acetate / carbondisulfide'	1.15441	1.43142	2.2191	0.446572	-0.0953856	-1.062
								'nitromethane / fluorobenzene'	-1.15824	0.113512	-0.301523	2.18206	-0.344269	0.725445
								'n-octane / anisole'	1.27137	2.29218	2.16345	-0.0164432	2.47077	-2.18946
								'propyl acetate / secbutylbenzene'	0.259799	0.66872	1.14048	-1.05511	0.679421	0.440775
								'isopropanol / octanol'	-1.4773	-1.60201	-0.229634	-0.138231	0.806309	-0.652956
								'methyl propanoate / toluene'	-0.34534	1.03179	0.979541	-0.159431	-0.353826	-0.215452
								'pentanoic acid / hexadecane'	-0.84423	-1.38209	-2.10468	-0.770401	3.00501	-0.277283
								'1,4-dioxane / propanol'	-0.557558	0.774605	1.42726	0.139865	-1.34532	-0.66321
								'2-butanone / pyridine'	0.5424	-0.22949	1.76398	0.664893	-0.654555	0.946239
								'2-hexanone / decane'	0.352107	0.430142	-0.745902	-1.3694	-0.561274	0.864852
								'fluorobenzene / fluorobenzene'	-0.0761487	1.02805	0.255374	1.34614	-0.164416	0.292098
								'2-butanone / fluorobenzene'	-0.121126	0.261296	0.596815	0.236793	-1.46407	0.834571
								'2-hexanone / octane'	0.42134	0.756732	-0.796826	-1.21698	-1.42636	0.791797
								'propylamine / decanol'	-1.44044	-1.52984	0.263294	-1.64802	0.450818	0.210674
								'2-hexanone / nonane'	0.332216	0.623266	-0.76863	-1.4012	-1.02645	0.937042
								'methyl pentanoate / pentadecane'	-0.193109	0.472368	-0.565114	-2.02574	1.89599	0.368962
								'methyl butanoate / octanol'	0.240281	0.0795946	0.126899	-0.344132	1.03313	-0.108789
								'methyl propanoate / methyl propanoate'	0.0147289	0.634143	0.268132	0.650758	-1.11954	-0.377635
								'2-butanone / benzonitrile'	0.718718	-1.00169	2.26226	0.154941	-0.00494748	2.13533
								'g-butyrolactone / ethanol'	0.257948	-0.232416	0.418883	1.00624	-2.65401	0.852893
								'2,2,4-trimethylpentane / 2,2,4-trimethylpentane'	0.0674599	2.90914	-0.127394	-0.525961	0.519998	-1.79975
								'2-butanone / benzylalcohol'	0.230232	-0.731103	1.7224	0.137067	0.833941	1.17253
								'propanoic acid / toluene'	-0.903471	-0.705031	-0.490603	1.21511	0.460922	-0.948072
								'dipropylamine / hexadecane'	-0.249309	-0.724402	-0.655457	-3.02787	1.60528	0.0990936
								'ethyl acetate / bromobenzene'	0.0719305	0.391564	1.86072	-0.317493	0.86181	0.362494
								'n-octane / cyclohexanone'	1.77297	1.76428	2.30145	0.414661	2.06092	-1.77834
								'ethanol / tetrahydrofuran'	-1.49699	-0.867607	0.448044	1.01551	-1.28962	-1.16275
								'ethyl acetate / perfluorobenzene'	-0.713643	0.958222	-0.504965	-0.089251	-0.800085	-0.507191
								'benzene / benzene'	-0.950166	2.09082	0.21577	2.50278	1.38271	-0.963956
								'propyl acetate / octanol'	0.335115	-0.0629729	0.0382713	-0.369078	0.920521	0.0206642
								'1,2-dimethoxyethane / octanol'	-0.687739	0.572576	1.04071	-0.979668	0.897778	-0.5233
								'2-hexanone / heptane'	0.522455	0.884632	-0.855912	-0.981932	-1.82964	0.591913
								'methyl acetate / 1,2-Dichlorethane'	-0.511072	0.573023	1.24257	0.721702	-0.713056	-0.0367075
								'methyl propanoate / chlorobenzene'	0.0139885	0.641228	1.64656	-0.096077	0.204085	0.180362
								'benzene / benzene'	-0.950166	2.09082	0.21577	2.50278	1.38271	-0.963956
								'2-butanone / tetrahydrofuran'	0.123938	0.173446	0.399143	0.830872	-1.83806	0.456034
								'toluene / hexadecane'	-1.25451	0.164314	-1.20179	-1.03812	2.77795	0.425588
								'acetic acid / bromoform'	-1.3107	-1.30325	1.11506	1.15663	2.76899	-0.368619
								'2-Propanol / methanol'	-0.264349	-1.1221	0.505821	1.78413	-1.84685	-1.38253
								'nitromethane / benzylalcohol'	-0.806884	-0.878887	0.82406	2.08233	1.95374	1.0634
								'di-n-propyl ether / di-n-propyl ether'	0.451342	1.56031	0.757863	-1.39765	-1.57801	-0.860698
								'2-butanone / 2methylpyridine'	0.22803	-0.200753	1.26481	0.369602	-0.626769	0.977855
								'1-propanol / butylacetate'	-1.27132	-1.06613	-0.248364	0.0970571	-0.612685	-0.895112
								'ethyl acetate / ethyl acetate'	0.12865	0.505065	0.12397	0.652366	-1.31189	-0.267045
								'triethylamine / triethylamine'	0.725847	1.42948	0.486367	-1.25641	-1.58945	-0.601724
								'n-octane / pyridine'	1.92427	2.14054	2.73648	0.741918	2.05586	-2.34054
								'benzene / carbontet'	-1.26632	2.09629	-0.298697	2.28431	1.50342	-0.923416
								'2-butanone / butanone '	0.23463	-0.130082	0.318744	0.726654	-2.24347	1.02703
								'nitromethane / benzene'	-1.32466	0.444375	-0.190435	2.10007	-0.196903	0.336236
								'ethylamine / butanol'	-1.35246	-1.10648	0.739687	-0.156819	-1.64073	-0.314164
								'1-nitropropane / carbondisulfide'	0.35954	1.38282	1.45879	1.9397	0.128315	-0.0350442
								'n-butylamine / n-butylamine'	0.0232649	-0.476505	0.463967	-0.570711	-1.93354	-0.970338
								'1,4-dioxane / isopropanol'	-0.643593	0.889365	1.12215	0.168935	-1.59211	-0.820452
								'1,1,2-trichloroethane / hexadecane'	-0.84051	0.239631	-2.5315	0.625316	2.58387	3.41663
								'acetic acid / decalin'	-2.08797	-0.703272	-0.882145	1.15067	1.23231	-1.42863
								'2-methyl tetrahydrofuran / 2-methyl tetrahydrofuran'	-0.179469	0.960135	1.44776	-1.13958	-2.26038	0.125917
								'propyl acetate / bromooctane'	-0.245183	0.591941	0.171056	-1.26873	0.874704	0.302178
								't-butanol / chloroform'	-0.337857	-0.508878	0.21093	0.459467	-0.654667	-1.50127
								'g-butyrolactone / butanone'	0.164229	-0.205764	0.52089	0.439785	-2.72605	1.44448
								'2-butanone / chlorobenzene'	-0.0630946	0.0286012	1.26779	-0.0924913	-0.529571	1.17965
								'2-butanone / benzene'	-0.287539	0.592159	0.707902	0.154809	-1.3167	0.445362
								'ethanol / butanone'	-1.3863	-1.17114	0.367645	0.911293	-1.69502	-0.591754
								'2-hexanone / hexadecane'	-0.232766	-0.232589	-0.988315	-2.22443	1.43752	1.44326
								'nitromethane / ethoxybenzene'	-1.48936	-0.241717	-0.0694795	1.38433	0.903522	1.35145
								'1-butanol / benzene'	-0.423958	-0.283874	0.635051	-0.0347305	-0.547111	-1.53573
								'ethanol / aniline'	-1.19534	-1.55958	2.20557	0.559433	1.47417	-0.773861
								'1-nitropropane / octanol'	-0.459757	-0.111577	-0.722035	1.12405	1.14422	1.04762
								'butylamine / anisole'	0.017003	-0.716559	1.69759	-1.29009	-0.319783	-0.359203
								'triethylamine / triethylamine'	0.692002	1.4616	0.468351	-1.27812	-1.58631	-0.631077
								'3,3-dimethylbutanone / pentane'	0.576372	1.01875	-1.23078	-0.393958	-2.82364	0.236101
								'methyl propanoate / carbontet'	-0.526608	1.21026	0.572208	-0.0672504	-0.462337	-0.51338
								'dimethylamine / isobutanol'	-1.40826	-0.925292	0.326973	0.257922	-1.57053	-0.289698
								'ethanol / acetonitrile'	-0.895997	-1.44453	1.09433	1.14075	-2.16809	-0.0222934
								'2-butanone / anisole'	-0.110504	-0.0778581	1.19094	-0.0934677	-0.23964	1.09732
								'2-butanone / cyclohexanone'	0.391093	-0.605753	1.32895	0.337637	-0.649494	1.50844
								'perfluorobenzene / perfluorobenzene'	0.161303	3.13894	-0.438511	0.741872	0.0841775	0.492228
								'acetone / chloroform'	-0.865008	0.324403	0.472635	0.635992	-1.63658	0.653695
								'propanoic acid / decalin'	-1.40147	-0.599516	-0.925005	0.98477	1.38017	-1.65682
								'cyclopentanol / hexadecane'	-1.72939	-1.38325	-1.15695	-1.85994	2.09407	-0.173346
								'ethyl acetate / toluene'	-0.254025	0.928116	0.918413	-0.195877	-0.445592	-0.118253
								'1-propanol / chloroform'	-1.04841	-0.55326	0.415876	0.444214	-0.860618	-1.35281
								'ethanol / cyclohexanone'	-1.22984	-1.64681	1.37785	0.522276	-0.101048	-0.110347
								'toluene / hexadecyliodide'	-1.40268	0.345195	-0.148682	-2.02528	3.35685	1.39056
								'ethanol / diethylether'	-2.0312	-0.473523	-0.752441	0.752236	-2.29495	-1.32009
								'carbon tetrachloride / carbon tetrachloride'	0.133989	3.69069	-0.243336	2.2262	0.505946	2.55134
								'n-octane / propanol'	1.53028	2.15458	1.13314	1.04481	0.993275	-2.73934
								'2-butanone / acetophenone'	0.391596	-0.78559	1.9588	-0.0227842	0.332298	1.77419
								'2-Propanol / acetonitrile'	-0.129408	-0.905831	1.50568	0.633301	-2.94384	0.329082
								'cyclopentanone / hexadecane'	-1.47143	-0.610514	-1.05462	-1.88042	1.08927	1.96917
								'methyl propanoate / tetrachloroethene'	-0.469134	0.961814	1.11043	-0.29741	0.428875	-0.283009
								'propanoic acid / chlorobenzene'	-0.544143	-1.0956	0.176415	1.27847	1.01883	-0.552258
								'1-pentanol / hexane'	-0.395221	0.0225704	-0.987381	-0.706062	-1.65351	-1.35182
								'n-octane / Diphenylether'	0.881601	1.771	2.39133	-0.869799	4.32122	-1.64509
								'2-butanone / bromobenzene'	-0.0964679	-0.117385	1.54307	-0.277462	0.21992	1.26458
								'toluene / decalin'	-0.342856	1.14885	-0.160819	0.417743	1.46202	-1.37594
								'3-pentanone / octanol'	0.111293	-0.503424	-0.19101	-0.398091	0.235866	0.937713
								'carbontet / carbontet '	0.133863	3.69081	-0.243403	2.22611	0.505958	2.55123
								'1-chlorobutane / 1-chlorobutane'	0.124882	1.11007	-0.0573375	1.38489	-0.655609	0.715515
								'toluene / nonanol'	-0.160275	-0.115481	-0.607814	0.386935	2.08958	-0.183246
								'allyl alcohol / chloroform'	-0.85957	-0.977536	-0.503351	1.40003	-0.495572	-1.04053
								'nitromethane / ethanol'	-0.708768	-0.304517	-0.681601	3.23837	-1.05163	0.326315
								'3,3-dimethylbutanone / hexane'	0.498083	0.86602	-1.06774	-0.665503	-2.32704	0.477637
								'butylamine / 1,2-Dichlorethane'	0.217985	-0.508181	1.38432	-0.676539	-1.40606	-0.693945
								'diethyl ether / chloroform'	-0.617924	1.44931	1.85287	-0.646032	-1.35213	-0.713223
								'2-butanone / ethanol'	0.328348	-0.156734	0.216736	1.29311	-2.17142	0.435442
								'nitromethane / toluene'	-1.45954	0.271383	-0.29757	1.78942	0.0323148	0.674705
								'1-butanol / toluene'	-0.558842	-0.456866	0.527917	-0.345385	-0.317894	-1.19727
								'ethyl acetate / ethylbenzene'	-0.341123	0.764506	0.877421	-0.405416	-0.149801	0.107544
								'1-butanol / chlorobenzene'	-0.199514	-0.847432	1.19494	-0.282031	0.240017	-0.801452
								'ethanol / tetrahydrothiophenedioxide'	-0.912733	-1.97752	6.18487	0.0308733	3.97668	-1.59361
								'pyridine / cyclohexane'	-0.835113	0.874399	-0.204278	0.456523	-1.21076	0.357414
								'3-pentanone / cyclohexane'	0.031668	0.819809	0.0159913	-0.404463	-1.77795	0.600671
								'nitromethane / perfluorobenzene'	-1.91916	0.30149	-1.72095	1.89604	-0.322178	0.285766
								'methyl propanoate / ethylbenzene'	-0.432438	0.868183	0.938549	-0.36897	-0.0580343	0.0103451
								'trichloroethene / cyclohexane'	0.200408	1.6435	-1.70057	2.4408	-0.236763	2.41414
								'pyridine / heptane'	-1.2563	0.878048	-0.945194	0.0384741	-1.45497	0.605897
								'isopropanol / chloroform'	-1.07325	-0.517761	0.396526	0.509982	-0.825706	-1.33214
								'pentylamine / hexadecane'	-0.976764	-0.994323	-0.443051	-3.17237	1.24055	0.195101
								'2-butanone / ethoxybenzene'	-0.452248	-0.0939337	0.828858	-0.560934	-0.216275	1.46057
								'ethylamine / pentanol'	-1.51591	-1.18357	0.648747	-0.416101	-1.28298	-0.18373
								'2-butanone / toluene'	-0.422423	0.419167	0.600767	-0.155846	-1.08748	0.783831
								'ethyl acetate / isobutanol'	0.106479	0.289805	0.274775	0.636466	-0.87516	-0.260299
								'butylamine / tetrahydrothiophenedioxide'	0.835703	-1.57516	6.64262	-1.35038	3.34809	-1.43135
								'fluorobenzene / chloroform'	-0.127014	1.18149	0.0764343	1.58243	-0.193791	-0.107844
								'ethyl acetate / chlorohexane'	-0.694014	0.837417	0.162263	-0.593021	-0.60284	0.178348
								'Benzene / acetonitrile'	0.109226	1.52533	1.03489	2.94437	-0.91216	0.686531
								'nitromethane / bromobenzene'	-1.13358	-0.265168	0.644734	1.6678	1.33972	1.15545
								'butanonitrile / octanol'	-1.15366	-0.213628	0.376447	-0.0886197	0.739785	0.00281009
								'tetrahydrofuran / tetrahydrofuran'	-0.608728	0.849169	1.82013	-0.485971	-2.31406	-0.0666116
								'butylamine / diethylether'	-0.282766	-0.0711702	-0.294692	-0.629021	-2.92354	-1.15783
								'1-pentanol / hexadecane'	-1.23358	-1.24166	-1.02397	-2.17696	2.06844	-0.307154
								'2,2,4-trimethylpentane / hexadecane'	-0.515351	1.69703	-0.209488	-1.44181	3.91395	-1.25133
								'pentanal / isooctane'	-0.544101	1.09863	-0.974917	-0.718292	-1.68557	0.914018
								'ethanol / ethylacetate'	-1.78323	-0.928618	-0.210013	0.79843	-1.39396	-1.09004
								'methyl acetate / perfluorobenzene'	-1.48359	0.891777	-0.457708	0.152402	-0.829118	-0.404393
								'propanoic acid / isopropylbenzene'	-1.18179	-0.890485	-0.706542	0.770334	0.90707	-0.611058
								'butylamine / bromobenzene'	0.0310388	-0.756086	2.04972	-1.47408	0.139776	-0.191945
								'butylamine / isopropyltoluene'	-0.734118	-0.282685	1.02003	-2.19152	-0.746092	-0.0405023
								'ethyl acetate / tbutylbenzene'	-0.620598	0.647904	0.694445	-0.838216	0.222726	0.413145
								'2-butanone / iodobenzene'	-0.122408	-0.242011	2.00706	-0.565728	1.11729	1.40853
								'ethyl acetate / isopropylbenzene'	-0.532345	0.742662	0.702474	-0.640657	0.000555622	0.218761
								'ethyl acetate / tetrachloroethene'	-0.377819	0.858136	1.0493	-0.333855	0.337108	-0.185809
								'tetrahydropyran / octanol'	-0.876026	0.277475	1.11061	-1.28923	0.146583	0.202701
								'benzene / diethylether'	-1.0729	2.06619	-1.29347	2.91557	-0.143982	-1.11063
								'propyl acetate / pentane'	-0.00426838	1.56365	-0.75449	-0.293547	-2.28889	-0.502739
								'methyl propanoate / chlorohexane'	-0.78533	0.941095	0.223391	-0.556576	-0.511073	0.0811483
								'methyl propanoate / xylene (mixed isomers)'	-0.522871	0.947708	1.10708	-0.35504	0.535968	-0.5191
								'nitromethane / xylene (mixed isomers)'	-1.63707	0.187298	-0.17003	1.59381	0.922108	0.371057
								'acetone / acetone'	-0.175605	-0.291008	0.428961	1.26594	-2.80388	1.2256
								'butylamine / iodobenzene'	0.0050988	-0.880712	2.51371	-1.76235	1.03714	-0.047997
								'methyl propanoate / butylbenzene'	-0.757078	0.690643	0.710219	-0.83133	0.48401	0.308923
								'2-pentanone / cyclohexane'	0.0692068	0.747513	-0.0794851	-0.318413	-1.7087	0.554238
								'methyl propanoate / isopropylbenzene'	-0.623661	0.846339	0.763602	-0.604211	0.0923221	0.121562
								'n-octane / octanol'	0.805836	1.70052	0.764217	-0.0981115	2.84899	-2.17297
								'1-butanol / xylene (mixed isomers)'	-0.736373	-0.540952	0.655456	-0.540994	0.571899	-1.50091
								'ethanol / nitromethane'	-0.584185	-1.725	1.85377	1.3759	-1.21696	-0.0624381
								'ethyl acetate / fluorooctane'	-0.955462	0.769624	-0.430226	-0.699953	-0.531759	0.125002
								'2-butanone / propanol'	0.148402	-0.215455	0.160634	0.967783	-1.71714	0.547438
								'3,3-dimethylbutanone / decane'	0.244597	0.26452	-0.86192	-1.28138	-0.603881	0.943885
								'fluorobenzene / hexane'	-0.948734	1.57114	-1.17946	0.738202	-1.27459	0.28947
								'methylamine / 4methyl2pentanone'	-2.15617	-1.18071	0.772009	-0.456672	-2.17551	0.350829
								'methyl propanoate / isopropyltoluene'	-0.784542	0.968642	0.892156	-0.998488	0.067708	0.416738
								'methyl propanoate / trimethylbenzene'	-0.488874	0.65484	1.12093	-0.586164	0.581017	0.201127
								'perfluoro-n-heptane / perfluoro-n-heptane'	1.99263	5.3364	-2.03944	-0.963526	0.734058	1.43552
								'fluorobenzene / heptane'	-1.03187	1.42413	-1.08364	0.509794	-0.819795	0.482779
								'propanal / octanol'	-1.31835	-0.556203	-0.257113	0.366114	0.416929	1.10818
								'butylamine / odichlorobenzene'	0.140139	-1.07081	2.1912	-1.58451	0.2263	0.266082
								'butylamine / perfluorobenzene'	-0.754535	-0.189428	-0.315959	-1.24584	-1.52212	-1.06163
								'diethylamine / carbontet'	-0.499587	0.173842	0.519058	-0.863743	-0.989216	-0.850194
								'ethanol / acetophenone'	-1.22933	-1.82664	2.0077	0.161855	0.880744	0.155403
								'2-butanone / ethylbenzene'	-0.509521	0.255557	0.559776	-0.365385	-0.791691	1.00963
								'2-butanone / butanol'	-0.01129	-0.303812	0.122515	0.668082	-1.30132	0.706923
								'ethyl acetate / secbutylbenzene'	-0.482956	0.57113	1.21157	-0.901204	0.539364	0.631839
								'nitromethane / iodobenzene'	-1.15952	-0.389795	1.10872	1.37954	2.23708	1.2994
								'propyl acetate / hexane'	-0.0825573	1.41092	-0.591459	-0.565091	-1.7923	-0.261204
								'2-butanone / chlorohexane'	-0.862413	0.328468	-0.155383	-0.55299	-1.24473	1.08043
								'Dichloromethane / DMSO'	0.539523	-0.182897	2.80883	2.55977	-0.154635	3.33749
								'1-pentanol / octane'	-0.579474	-0.25234	-0.832481	-1.16951	-0.795438	-0.958622
								'1-pentanol / heptane'	-0.478359	-0.12444	-0.891566	-0.934469	-1.19872	-1.15851
								'1-pentanol / dodecane'	-0.91836	-0.774583	-0.86256	-1.76065	0.699785	-0.529533
								'2-butanone / tetrahydrothiophenedioxide'	0.708197	-0.936463	6.13597	-0.153765	3.42823	0.0251734
								'2-butanone / diethylether'	-0.410272	0.567531	-0.801342	0.567598	-2.84339	0.298692
								'methyl propanoate / fluorooctane'	-1.04678	0.873302	-0.369098	-0.663507	-0.439993	0.0278022
								'ethylamine / octanol'	-1.91721	-1.47218	0.408886	-1.00004	-0.200836	0.0927247
								'thiophene / heptane'	-1.26427	1.14882	-1.48194	0.915487	-0.787743	0.896316
								'propyl acetate / heptane'	-0.165696	1.26391	-0.495644	-0.793499	-1.3375	-0.0678945
								'1,1,1-trichloroethane / cyclohexane'	0.193933	2.00795	-1.31967	2.3052	-0.178642	2.1251
								'trichloroethene / hexadecane'	-0.975999	0.529928	-2.57389	0.780256	2.78619	3.51398
								'2-butanone / Diphenylether'	-0.500274	-0.599033	1.41883	-0.946823	1.61081	1.64169
								'acetic acid / xylene (mixed isomers)'	-1.7675	-0.892873	-0.320203	1.18541	1.20285	-1.02352
								'propyl acetate / nonane'	-0.355934	1.00254	-0.408362	-1.21277	-0.534312	0.277234
								'2-pentanone / heptane'	-0.351979	0.751162	-0.820402	-0.736462	-1.95291	0.80272
								'methyl propanoate / octanol'	-0.498956	-0.0568856	0.170487	-0.178722	0.872231	0.114529
								'propanoic acid / heptane'	-1.5579	-0.466828	-1.83357	0.771403	-0.571041	-0.70665
								'1-nitropropane / cyclohexane'	-0.539382	1.21166	-0.515034	1.11768	-0.869594	0.710578
								'butylamine / isopropylbenzene'	-0.573237	-0.404989	0.89148	-1.79724	-0.721478	-0.335678
								'ethyl acetate / octanol'	-0.40764	-0.160563	0.109359	-0.215167	0.780464	0.211728
								'1-butanol / iodobenzene'	-0.258827	-1.11804	1.9342	-0.755267	1.88687	-0.572571
								'ethanol / benzonitrile'	-0.902211	-2.04275	2.31116	0.339579	0.543499	0.516547
								'propylamine / 1,2-Dichlorethane'	-0.503931	-0.598528	1.44629	-0.520601	-1.58026	-0.431734
								'nitromethane / propanol'	-0.888714	-0.363238	-0.737703	2.91305	-0.597339	0.438312
								'methyl acetate / benzene'	-0.889089	1.03466	1.0728	0.356431	-0.703843	-0.353923
								'1-propanol / bromoform'	-1.01958	-1.04329	2.16158	-0.409101	2.00127	-0.652354
								'fluorobenzene / hexadecane'	-1.78709	0.306909	-1.21604	-0.732701	2.44736	1.33413
								'perfluoro(methylcyclohexane) / perfluoro(methylcyclohexane)'	1.37713	5.06939	-1.70276	-0.0805757	1.0635	0.758648
								'isopropyl ether / isopropyl ether'	0.529751	1.45549	0.40369	-1.19628	-2.08023	-0.721477
								'acetic acid / benzene'	-1.45509	-0.635796	-0.340608	1.69167	0.0838362	-1.05834
								'ethylamine / nonanol'	-2.07901	-1.54231	0.336542	-1.2419	0.119917	0.246684
								'diethylamine / benzene'	-0.183434	0.168371	1.03353	-0.645269	-1.10992	-0.890734
								'propyl acetate / decane'	-0.336043	0.80942	-0.385634	-1.18097	-0.0691373	0.205045
								'2-butanone / isopropylbenzene'	-0.700744	0.233712	0.384829	-0.600626	-0.641334	1.12085
								'isopropyl ether / hexadecane'	-0.772661	0.632733	0.320461	-3.27331	1.42349	0.542691
								'ethanol / triethylamine'	-2.21999	-0.627831	-0.466878	0.281278	-1.32052	-1.1194
								'thiophene / hexadecane'	-2.01949	0.0315987	-1.61434	-0.327009	2.47941	1.74767
								'methyl butanoate / hexadecane'	-1.01575	0.289256	-0.539419	-2.01105	2.04226	0.654004
								'benzene / heptane'	-1.73948	2.15603	-1.23433	1.74842	0.579968	-0.384065
								'acetic acid / toluene'	-1.58997	-0.808788	-0.447743	1.38102	0.313054	-0.719876
								'methyl acetate / chlorobenzene'	-0.664645	0.471105	1.63269	0.10913	0.0832857	0.38036
								'nitromethane / isopropanol'	-0.974749	-0.248478	-1.04281	2.94212	-0.84413	0.28107
								'carbon disulfide / carbon disulfide'	-0.936313	3.30387	1.15707	4.19137	1.78871	0.670951
								'2-pentanone / tetralin'	0.163167	-0.0374556	0.987634	-0.83194	0.748307	1.01234
								'propylamine / tributylphosphate'	-1.4548	-1.56571	0.00987512	-1.74768	0.317707	0.403842
								'ethanol / nitroethane'	-0.887722	-1.67881	1.3559	1.06936	-1.09657	-0.0733696
								'isopropyl ether / diisopropylether'	0.449369	1.53178	0.3609	-1.24784	-2.07277	-0.791192
								'2-pentanone / octane'	-0.453094	0.623262	-0.761316	-0.971507	-1.54963	1.0026
								'2-pentanone / nonane'	-0.542218	0.489796	-0.73312	-1.15573	-1.14972	1.14785
								'ethyl acetate / bromooctane'	-0.987939	0.494351	0.242144	-1.11482	0.734647	0.493242
								'propionaldehyde / propionaldehyde'	-0.285644	0.0467908	0.450732	1.5534	-2.33206	1.00732
								'benzene / hexane'	-1.65634	2.30304	-1.33015	1.97682	0.125171	-0.577374
								'Benzene / DMSO'	0.768962	0.830389	3.27991	2.59612	1.00048	1.58863
								'1-nitropropane / hexadecane'	-1.71579	0.0980846	-1.38835	-0.542862	2.15335	1.81041
								'1-nitropropane / octane'	-1.06168	1.08741	-1.19686	0.464588	-0.710521	1.15895
								'carbondisulfide / carbondisulfide'	-0.936313	3.30387	1.15707	4.19137	1.78871	0.670951
								'2-butanone / mesitylene'	-0.674674	0.902805	1.14573	-1.19485	-1.85268	1.81248
								'methylamine / pentanol'	-2.23903	-1.33553	0.730939	-0.328588	-1.47913	0.00927415
								'1-nitropropane / isooctane'	-1.15343	1.32961	-1.31715	0.359865	-1.2387	1.24426
								'ethanol / chloroform'	-1.79292	-0.626318	0.466776	0.657716	-0.944995	-1.18416
								'2-butanone / tbutylbenzene'	-0.788996	0.138955	0.3768	-0.798184	-0.419164	1.31523
								'3,3-dimethylbutanone / hexadecane'	-0.340276	-0.398211	-1.10433	-2.13641	1.39491	1.5223
								'2-pentanone / decane'	-0.522327	0.296673	-0.710392	-1.12393	-0.684544	1.07566
								'diethylamine / xylene (mixed isomers)'	-0.495849	-0.0887071	1.05393	-1.15153	0.00908883	-0.855913
								'propyl acetate / hexadecane'	-0.920917	0.146688	-0.628047	-2.03599	1.92965	0.783457
								'nitromethane / butanol'	-1.04841	-0.451596	-0.775822	2.61335	-0.181524	0.597797
								'tetrahydrofuran / octanol'	-1.3087	0.00621075	1.2127	-1.49198	-0.337422	0.591166
								'diethylamine / diethylamine'	-0.179821	-0.01799	-0.138544	-0.203242	-2.11428	-1.05277
								'1-pentanol / nonane'	-0.668598	-0.385806	-0.804284	-1.35374	-0.395529	-0.813377
								'methyl acetate / secbutylbenzene'	-1.2529	0.504684	1.25883	-0.659551	0.510331	0.734637
								'ethylamine / decanol'	-2.1872	-1.60346	0.311851	-1.43224	0.365753	0.383899
								'trimethylamine / chloroform'	-1.05934	1.18161	1.52704	-0.308322	-1.5482	-0.106202
								'trimethylamine / isobutanol'	-0.949265	0.547732	1.0663	-0.104902	-1.5718	0.100953
								'nitromethane / diisopropylether'	-1.64716	0.291412	-1.7325	2.12868	-1.22876	0.433596
								'ethanol / diisopropylether'	-2.23097	-0.601858	-0.785263	0.368059	-1.80011	-1.07606
								'tetrahydropyran / tetrahydropyran'	-0.244477	1.00318	1.78692	-0.497994	-1.4484	-0.280957
								'thiophene / octanol'	-0.763458	-0.178062	-0.94802	1.33991	1.47028	0.984875
								'pentanal / hexadecane'	-1.10646	-0.13289	-1.04612	-1.62102	1.70649	1.48017
								'tr-1,2-dichloroethylene / tr-1,2-dichloroethylene'	-0.679475	1.67347	-0.904723	3.1853	0.470008	0.589727
								'methylhydrazine / octanol'	-1.93155	-1.55575	0.0381874	-0.550576	-0.211071	0.655934
								'trichloroethene / undecane'	-0.621381	1.15255	-2.35963	1.22245	1.03901	3.30834
								'2,4-dimethylpentane / hexadecane'	-1.1838	1.64219	-0.0737535	-1.39326	3.712	-1.03299
								'methanol / octanol'	-2.92338	-1.8523	-0.135828	0.204792	0.584227	-0.348673
								'1-propanol / benzene'	-1.16396	-0.375836	0.705903	0.125946	-0.683876	-1.34208
								'methyl acetate / bromobenzene'	-0.698018	0.325119	1.90797	-0.0758404	0.832776	0.465292
								'2-butanone / triethylamine'	-0.599061	0.413222	-0.51578	0.0966398	-1.86896	0.499387
								'acetone / chlorobenzene'	-0.75611	-0.0617315	1.32255	0.070423	-0.672709	1.39871
								'1-propanol / 1,2-Dichlorethane'	-0.785944	-0.837475	0.875672	0.491217	-0.693089	-1.02486
								'2-butanone / carbondisulfide'	0.243259	0.824885	1.97254	0.640513	-0.877332	0.0311476
								'dichloromethane / dichloromethane'	-0.585979	0.694204	-0.30046	3.30747	-0.405723	0.844248
								'trichloroethene / decane'	-0.391125	1.19266	-2.33148	1.63528	0.787395	2.93556
								'diethylamine / diethylether'	-0.306167	0.143742	-0.475719	-0.232481	-2.63662	-1.0374
								'3-pentanone / hexadecane'	-1.14474	-0.293762	-0.857328	-2.06501	1.245	1.70051
								'1,1,1-trichloroethane / undecane'	-0.627856	1.517	-1.97873	1.08686	1.09713	3.01929
								'ethanol / methylenechloride'	-1.43887	-0.71451	0.64563	1.10095	-1.39007	-1.22164
								'benzene / nonanol'	-1.40047	0.759017	-0.772762	1.93098	3.15874	-0.141548
								'methyl acetate / carbontet'	-1.20524	1.04013	0.558337	0.137957	-0.583137	-0.313383
								'N,N-dimethylformamide / cyclohexane'	-0.667342	0.573493	0.614836	-1.25758	-2.95671	1.39779
								'acetone / perfluorobenzene'	-1.57506	0.35894	-0.76785	0.113695	-1.58511	0.613957
								'pyridine / hexane'	-1.17316	1.02506	-1.04101	0.266882	-1.90976	0.412588
								'methyl acetate / toluene'	-1.02397	0.86167	0.965669	0.0457757	-0.474625	-0.0154547
								'dichloromethane / methylenechloride'	-0.710004	0.81192	-0.366482	3.22792	-0.394218	0.736682
								'benzene / hexadecane'	-2.4947	1.03881	-1.36674	0.505921	3.84712	0.467287
								'benzene / decane'	-1.90982	1.70154	-1.12432	1.36094	1.84833	-0.111126
								'diethylamine / dibutylether'	-0.694632	-0.325338	-0.185549	-1.19621	-1.0508	-0.247163
								'acetone / benzene'	-0.980555	0.501826	0.762663	0.317723	-1.45984	0.664427
								'2-butanone / octanol'	-0.576039	-0.669512	-0.208286	-0.175136	0.138574	1.11381
								'propanoic acid / cyclohexane'	-1.13671	-0.470477	-1.09266	1.18945	-0.326837	-0.955133
								'isopropyl ether / chloroform'	0.887418	1.50732	1.61294	-0.958183	-1.21766	-0.899284
								'diethylamine / diisopropylether'	-0.505936	0.0154074	-0.508542	-0.616658	-2.14178	-0.793374
								'methylamine / octanol'	-2.64033	-1.62414	0.491078	-0.912525	-0.396979	0.285729
								'pyrrole / cyclohexane'	-1.04768	-0.748393	-0.684599	-0.0255875	-1.86775	0.361115
								'1-butanol / pentane'	-1.05184	0.0810799	-1.0739	-0.289145	-2.30125	-1.39069
								'1-butanol / decane'	-1.38362	-0.673152	-0.705042	-1.17657	-0.0814953	-0.682904
								'1-butanol / hexane'	-1.13013	-0.0716524	-0.910867	-0.560689	-1.80465	-1.14915
								'1-butanol / nonane'	-1.40351	-0.480029	-0.72777	-1.20837	-0.54667	-0.610715
								'Acetone / DMSO'	0.738573	-0.758606	3.8268	0.411065	-1.84207	3.21702
								'diethylamine / toluene'	-0.318318	-0.0046214	0.926391	-0.955924	-0.880704	-0.552266
								'n-heptane / octanol'	0.0479818	1.63243	0.855024	0.06983	2.72984	-2.00337
								'1,1,1-trichloroethane / hexadecane'	-0.982474	0.894381	-2.19299	0.644658	2.84431	3.22493
								'benzene / octanol'	-1.23867	0.82915	-0.700418	2.17284	2.83799	-0.295506
								'1-propanol / toluene'	-1.29885	-0.548828	0.598769	-0.184709	-0.454658	-1.00361
								'1-propanol / ethylbenzene'	-1.38594	-0.712438	0.557778	-0.394248	-0.158867	-0.777814
								'dimethyl sulfide / dimethyl sulfide'	-0.288318	0.508029	0.80172	0.662293	-2.58208	1.00006
								'propylamine / xylene (mixed isomers)'	-1.19436	-0.393966	1.29692	-1.39214	-0.452034	-0.714129
								'methyl propanoate / pentane'	-0.838339	1.56974	-0.622274	-0.103191	-2.33718	-0.408875
								'dimethylamine / chloroform'	-1.51833	-0.291412	0.787718	0.0545015	-1.54693	-0.496852
								'ethyl acetate / pentane'	-0.747024	1.46606	-0.683402	-0.139637	-2.42895	-0.311675
								'1-butanol / octane'	-1.31438	-0.346563	-0.755966	-1.02414	-0.946579	-0.75596
								'benzene / hexanol'	-0.988064	1.03872	-0.544993	2.53237	2.11323	-0.474821
								'propylamine / benzene'	-0.881948	-0.136889	1.27652	-0.885873	-1.57105	-0.74895
								'nitromethane / dibutylether'	-1.83585	-0.0493327	-1.40951	1.54913	-0.137781	0.979807
								'methyl acetate / carbondisulfide'	-0.358291	1.26739	2.33744	0.842135	-0.264475	-0.768138
								'1-butanol / heptane'	-1.21327	-0.218663	-0.815052	-0.789097	-1.34986	-0.955844
								'methyl acetate / chlorohexane'	-1.46396	0.770972	0.209519	-0.351368	-0.631873	0.281146
								'1-propanethiol / hexadecane'	-1.82425	0.198176	-0.936507	-1.33681	1.70231	2.03812
								'propionitrile / octanol'	-1.91641	-0.302547	0.403582	0.168141	0.7145	0.106514
								'methyl propanoate / hexane'	-0.916628	1.41701	-0.459243	-0.374735	-1.84059	-0.167339
								'acetaldehyde / chloroform'	-1.60759	0.357208	0.340235	1.25651	-1.29206	0.586709
								'propylamine / diethylether'	-1.00468	-0.161517	-0.232727	-0.473084	-3.09774	-0.89562
								'1-propanol / carbontet'	-1.48011	-0.370364	0.191436	-0.092528	-0.563169	-1.30154
								'Tetrahydrofuran / DMSO'	0.698923	0.00744984	5.19303	-1.06869	-2.17493	2.47531
								'acetic acid / carbontet'	-1.77124	-0.630324	-0.855076	1.4732	0.204543	-1.0178
								'nitromethane / triethylamine'	-1.63618	0.265438	-1.41412	2.0419	-0.749168	0.390261
								'butylamine / hexane'	-0.866205	0.16568	-0.331365	-1.56777	-2.65439	-0.624579
								'ethyl acetate / hexane'	-0.825313	1.31333	-0.520371	-0.411181	-1.93235	-0.0701398
								'n-hexane / benzene'	-0.444888	2.84691	1.8626	0.60218	1.21401	-2.56301
								'methanol / diethylether'	-2.75761	-0.615262	-0.728884	0.947526	-2.39774	-1.16379
								'diethylamine / cyclohexane'	-0.551559	0.229932	0.324339	-0.981587	-1.66846	-0.559326
								'trimethylamine / octanol'	-1.46338	0.0973643	0.900882	-0.956535	0.0838197	0.57298
								'1,2-dichloroethene / undecane'	-1.60794	0.90822	-1.8003	0.77151	0.563233	2.99093
								'acetonitrile / diethylether'	-2.55219	0.834869	-0.150146	1.17558	-2.25263	-0.683529
								'propylamine / chlorobenzene'	-0.657504	-0.700446	1.8364	-1.13317	-0.783916	-0.0146671
								'fluorobenzene / cyclohexane'	-0.610686	1.42048	-0.342725	0.927843	-0.575591	0.234297
								'methyl acetate / fluorooctane'	-1.72541	0.703179	-0.382969	-0.4583	-0.560793	0.2278
								'ethanol / anisole'	-1.73143	-1.11891	1.23984	0.091171	0.308807	-0.521467
								'furan / furan'	-1.12071	0.954333	0.25959	1.2258	-1.62876	-0.324917
								'methyl acetate / trimethylbenzene'	-1.16751	0.484717	1.10705	-0.380956	0.460218	0.401124
								'methyl acetate / tbutylbenzene'	-1.39055	0.581458	0.741702	-0.596563	0.193692	0.515943
								'1-propanol / xylene (mixed isomers)'	-1.47638	-0.632914	0.726308	-0.380318	0.435135	-1.30726
								'methyl propanoate / octane'	-1.10088	1.1421	-0.304342	-0.838188	-0.982511	0.225854
								'butylamine / isooctane'	-1.1422	0.132973	-0.296747	-2.13594	-2.32449	-0.146071
								'1-butanol / isooctane'	-1.40613	-0.104359	-0.876248	-1.12886	-1.47476	-0.670645
								'ethyl acetate / cyclohexane'	-0.487265	1.16267	0.316361	-0.22154	-1.23335	-0.125313
								'butylamine / decane'	-1.11969	-0.43582	-0.125541	-2.18365	-0.931227	-0.158331
								'butylamine / heptane'	-0.949343	0.0186692	-0.235551	-1.79618	-2.19959	-0.43127
								'butylamine / nonane'	-1.13958	-0.242697	-0.148269	-2.21544	-1.3964	-0.0861414
								'butylamine / undecane'	-1.34995	-0.47593	-0.15369	-2.59647	-0.67961	0.214445
								'methyl acetate / octanol'	-1.17759	-0.227009	0.156616	0.0264855	0.751431	0.314526
								'1-butanol / cyclohexane'	-0.792083	-0.222312	-0.0741352	-0.371048	-1.10565	-1.20433
								'1-hexene / hexadecane'	-1.36591	0.830793	-0.671199	-1.24588	2.9016	0.2271
								'ethanol / dibutylether'	-2.41967	-0.942603	-0.46227	-0.211494	-0.709131	-0.529854
								'propylamine / toluene'	-1.01683	-0.309881	1.16938	-1.19653	-1.34183	-0.410482
								'ethyl acetate / heptane'	-0.908451	1.16632	-0.424556	-0.639589	-1.47756	0.123169
								'methyl propanoate / decalin'	-0.843336	1.13731	0.545138	-0.389775	0.565426	-0.924202
								'methyl propanoate / nonane'	-1.19001	1.00863	-0.276146	-1.02241	-0.582602	0.371099
								't-butyl methyl ether / octanol'	-0.276526	0.315857	1.02672	-1.38842	0.322404	-0.0540123
								'formaldehyde / butanol'	-2.37071	0.0807844	0.176478	2.02976	-0.785884	0.921414
								'2-methylpentane / hexadecane'	-1.9953	1.73831	0.209065	-1.33096	3.66786	-1.07045
								'butanonitrile / hexadecane'	-2.40969	-0.00396644	-0.289871	-1.75554	1.74892	0.765603
								'isopropanol / benzene'	-1.1888	-0.340337	0.686554	0.191714	-0.648965	-1.3214
								'2-butanone / cyclohexane'	-0.655664	0.653721	-0.00128454	-0.181508	-1.87524	0.77677
								'formaldehyde / benzylalcohol'	-2.12918	-0.346506	1.77636	1.49874	1.34938	1.38702
								'fluorobenzene / decane'	-1.20222	0.96964	-0.973632	0.122322	0.448567	0.755719
								'2-butanone / hexane'	-0.993711	0.80438	-0.838016	-0.37115	-2.57424	0.831944
								'1-propanol / odichlorobenzene'	-0.86379	-1.4001	1.68255	-0.416757	0.939267	-0.0648363
								'2-nitropropane / hexadecane'	-1.52148	-0.109198	-1.56132	-0.505649	2.22165	1.70207
								'1-butanol / dodecane'	-1.65327	-0.868806	-0.786046	-1.61528	0.548644	-0.32687
								'cyclohexane / octanol'	-1.38852	1.67939	0.611574	1.09692	2.91537	-1.43362
								'2-pentene / carbontet'	-0.747406	1.53543	0.478289	0.362947	0.124193	-0.878634
								'ethanol / fluorobenzene'	-1.74206	-0.779758	0.645716	0.421432	-0.91562	-0.784216
								'acetone / chlorohexane'	-1.55543	0.238136	-0.100622	-0.390076	-1.38787	1.2995
								'ethyl acetate / nonane'	-1.09869	0.904953	-0.337274	-1.05886	-0.674369	0.468298
								'ethanol / ethoxybenzene'	-2.07318	-1.13499	0.877759	-0.376295	0.332171	-0.158215
								'butanal / isooctane'	-1.28405	1.00623	-0.903681	-0.561154	-1.82336	1.10721
								'propylamine / odichlorobenzene'	-0.581777	-1.16115	2.25317	-1.42857	0.0520978	0.528293
								'formaldehyde / pentanol'	-2.53415	0.00369268	0.0855376	1.77047	-0.428136	1.05185
								'fluorobenzene / decalin'	-0.875442	1.29144	-0.175075	0.723161	1.13142	-0.467393
								'butylamine / octane'	-1.05046	-0.109231	-0.176465	-2.03122	-1.79631	-0.231386
								'propylamine / ethylbenzene'	-1.10393	-0.473491	1.12839	-1.40607	-1.04604	-0.184684
								'hydrazine / octanol'	-2.80605	-1.53409	0.198514	-0.295682	-0.142784	0.566994
								'diethyl ether / diethyl ether '	-0.810805	1.55902	0.657821	-0.522392	-2.70629	-0.809786
								'ethyl acetate / decane'	-1.0788	0.71183	-0.314546	-1.02706	-0.209194	0.396109
								'ethanol / xylene (mixed isomers)'	-2.22088	-0.705972	0.777208	-0.166816	0.350757	-1.1386
								'1-hexyne / hexadecane'	-1.56041	0.0512047	-0.485336	-1.94356	2.34963	-0.0663046
								'ethanol / benzene'	-1.90847	-0.448894	0.756804	0.339448	-0.768253	-1.17342
								'formaldehyde / hexanol'	-2.68485	-0.0753462	0.00110136	1.54607	-0.070748	1.14899
								'acetone / ethylbenzene'	-1.20254	0.165224	0.614537	-0.20247	-0.934828	1.22869
								'2-butanone / isooctane'	-1.26971	0.771673	-0.803398	-0.939325	-2.24435	1.31045
								'diethyl ether / diethylether'	-0.856205	1.60211	0.633653	-0.551511	-2.70208	-0.849161
								'methanol / ethylacetate'	-2.50964	-1.07036	-0.186456	0.99372	-1.49676	-0.933737
								'ethyl acetate / pentadecane'	-1.56748	0.141643	-0.509018	-1.74857	1.50117	0.884579
								'2-butanone / heptane'	-1.07685	0.65737	-0.742201	-0.599557	-2.11945	1.02525
								'dimethylamine / xylene (mixed isomers)'	-1.9463	-0.371067	1.09815	-0.770031	-0.251173	-0.451299
								'chloroform / hexadecyliodide'	-1.77241	0.0963367	-1.74073	0.251414	3.82708	3.57152
								'acetone / carbontet'	-1.29671	0.507298	0.248195	0.0992497	-1.33913	0.704967
								'methyl acetate / bromooctane'	-1.75789	0.427905	0.289401	-0.873169	0.705614	0.59604
								'methyl propanoate / pentadecane'	-1.6588	0.24532	-0.44789	-1.71212	1.59294	0.787379
								'acetamide / hexadecane'	-2.38127	-1.91275	-1.17687	-2.14102	0.532409	1.83038
								'1,2-dichloroethene / hexadecane'	-1.96256	0.285598	-2.01456	0.329312	2.31041	3.19656
								'ethanol / toluene'	-2.04335	-0.621886	0.649669	0.028793	-0.539036	-0.834957
								'methyl acetate / isopropyltoluene'	-1.46318	0.798519	0.878285	-0.793281	-0.0530918	0.616735
								'acetone / isopropylbenzene'	-1.39376	0.14338	0.43959	-0.437711	-0.784472	1.33991
								'methanol / chloroform'	-2.51933	-0.768057	0.490333	0.853006	-1.04779	-1.02785
								'2-butanone / decane'	-1.2472	0.202881	-0.632192	-0.98703	-0.851084	1.29819
								'nitroethane / hexadecane'	-2.20947	-0.423095	-1.70504	-0.179691	2.25714	1.70509
								'diethylamine / hexadecane'	-1.72797	-0.883639	-0.548981	-2.64213	1.35448	0.540509
								'ethanol / bromobenzene'	-1.7174	-1.15844	1.59197	-0.0928232	0.768366	-0.35421
								'ethanol / bromoform'	-1.76408	-1.11635	2.21248	-0.195599	1.9169	-0.483699
								'2-butanone / octane'	-1.17796	0.52947	-0.683116	-0.834602	-1.71617	1.22514
								'formaldehyde / octanol'	-2.93545	-0.284915	-0.154324	1.18654	0.654011	1.3283
								'2-methylbutane / 2-methylbutane'	-1.76546	3.05434	0.0744786	0.776813	-0.703015	-2.38834
								'methylcyclohexane / octanol'	-0.516818	1.32528	0.668243	0.323542	2.52236	-1.60817
								'methylamine / xylene (mixed isomers)'	-2.66425	-0.619545	1.42767	-1.08884	-0.733242	-0.3479
								'2-butanone / nonane'	-1.26709	0.396004	-0.654919	-1.01883	-1.31626	1.37038
								'ethylamine / 1,2-Dichlorethane'	-1.2507	-0.672145	1.49484	-0.304821	-1.66532	-0.258509
								'nitroethane / hexane'	-1.37111	0.841137	-1.66846	1.29121	-1.4648	0.660425
								'ethanol / iodobenzene'	-1.74334	-1.28306	2.05596	-0.381089	1.66573	-0.210261
								'methylamine / chloroform'	-2.23629	-0.539891	1.11724	-0.264312	-2.029	-0.393453
								'isopropanol / carbontet'	-1.50495	-0.334865	0.172086	-0.02676	-0.528258	-1.28086
								'acetonitrile / octanol'	-2.71795	-0.402173	0.44291	0.432849	0.729341	0.131591
								'hydrogen peroxide / carbondisulfide'	-2.27494	-0.337673	0.885445	2.95822	0.758736	-1.28052
								'hydrogen peroxide / carbontet'	-3.12189	-0.564927	-0.893659	2.25404	0.440075	-0.825762
								'hydrogen peroxide / toluene'	-2.94062	-0.743391	-0.486326	2.16186	0.548586	-0.527834
								'acetone / carbondisulfide'	-0.449757	0.734552	2.0273	0.803428	-1.02047	0.250212
								'methyl acetate / pentane'	-1.51697	1.39962	-0.636145	0.102016	-2.45798	-0.208877
								'ethanethiol / isooctane'	-1.9975	1.32047	-0.809754	-0.270807	-1.83051	1.67424
								'propylamine / pentane'	-1.50983	0.228065	-0.432432	-1.14029	-3.32518	-0.603904
								'propylamine / hexane'	-1.58812	0.0753329	-0.269401	-1.41183	-2.82859	-0.362368
								'2-butanone / hexadecane'	-1.83207	-0.459851	-0.874604	-1.84205	1.14771	1.8766
								'methyl acetate / hexane'	-1.59526	1.24688	-0.473114	-0.169528	-1.96139	0.0326584
								'2-butanone / tetralin'	-0.561704	-0.131248	1.06583	-0.695036	0.581767	1.23487
								'1-propanethiol / cyclohexane'	-0.647846	1.31175	-0.0631874	0.323737	-1.32063	0.938288
								'tetramethylsilane / tetramethylsilane'	-0.730744	2.68963	-0.105785	-0.753552	-1.87682	-1.50216
								'butanal / hexadecane'	-1.84641	-0.225296	-0.974888	-1.46388	1.56869	1.67337
								'trimethylamine / carbontet'	-1.49104	1.36451	1.3026	-0.845064	-1.25075	-0.0549295
								'acetone / tetrachloroethene'	-1.23923	0.258855	0.78642	-0.13091	-0.447919	0.935339
								'n-hexane / isooctane'	-1.42706	3.02643	0.351301	-0.491955	0.286358	-1.69792
								'hydrazine / diethylether'	-2.64028	-0.297046	-0.394543	0.447051	-3.12475	-0.248125
								'methyl acetate / octane'	-1.77951	0.971974	-0.318214	-0.632981	-1.10331	0.425852
								'methyl acetate / cyclohexane'	-1.25721	1.09622	0.363617	0.0201131	-1.26238	-0.0225151
								'dimethyl sulfide / hexadecane'	-2.35811	-0.272701	-0.561499	-2.11433	0.77222	2.4364
								'methanol / butylacetate'	-2.74224	-1.28093	-0.173907	0.505849	-0.799856	-0.570155
								'diethyl ether / cyclohexane'	-1.1016	1.6883	1.43371	-1.30062	-1.73393	-0.371083
								'propylamine / heptane'	-1.67126	-0.0716774	-0.173586	-1.64024	-2.37379	-0.169059
								'methyl acetate / nonane'	-1.86864	0.838508	-0.290017	-0.817204	-0.703402	0.571096
								'dimethylamine / benzene'	-1.63388	-0.113989	1.07775	-0.263767	-1.37018	-0.48612
								'ethylamine / xylene (mixed isomers)'	-1.94113	-0.467583	1.34548	-1.17636	-0.537099	-0.540904
								'n-hexane / octanol'	-0.733388	1.58524	0.946412	0.272235	2.66928	-1.89456
								'1-propanol / heptane'	-1.95327	-0.310625	-0.7442	-0.628421	-1.48662	-0.762189
								'propylamine / octane'	-1.77237	-0.199577	-0.1145	-1.87528	-1.97051	0.0308249
								'1-propanol / isooctane'	-2.14613	-0.196322	-0.805396	-0.968189	-1.61153	-0.47699
								'methyl acetate / decane'	-1.84875	0.645384	-0.26729	-0.785408	-0.238227	0.498907
								'propylamine / decane'	-1.84161	-0.526167	-0.0635764	-2.02771	-1.10543	0.10388
								'ethanethiol / hexadecane'	-2.55986	0.0889438	-0.880961	-1.17353	1.56155	2.24039
								'propylamine / nonane'	-1.8615	-0.333043	-0.0863043	-2.05951	-1.5706	0.176069
								'ethanol / carbontet'	-2.22462	-0.443423	0.242336	0.120974	-0.647547	-1.13288
								'propylamine / hexadecane'	-2.42648	-1.1889	-0.305989	-2.88273	0.893361	0.682293
								'tetramethylsilane / hexadecane'	-1.47432	1.13381	0.254335	-2.28933	2.57621	-0.286885
								'formamide / hexadecane'	-3.22867	-1.99404	-1.29063	-1.59272	0.705996	1.88816
								'ethanol / isopropylbenzene'	-2.32167	-0.807341	0.433731	-0.415987	-0.0928881	-0.497942
								'methyl acetate / decalin'	-1.52197	0.967185	0.531267	-0.184568	0.444626	-0.724205
								'nitromethane / hexane'	-2.03083	0.656597	-1.73635	1.57411	-1.45445	0.722818
								'diethyl ether / octanol'	-1.02197	0.365066	1.22671	-1.29425	0.279889	-0.0340415
								'ethylamine / diethylether'	-1.75145	-0.235134	-0.18417	-0.257304	-3.1828	-0.722395
								'1,1,2-trichloro-1,2,2-trifluoroethane / hexadecane'	-0.945515	3.24179	-0.892836	0.302738	3.20156	3.42591
								'3-chloropropene / hexadecane'	-2.1389	-0.0695831	-1.65798	-0.182459	2.31645	2.05544
								'trimethylamine / 4methyl2pentanone'	-0.979223	0.54079	1.18181	-0.500682	-1.69471	0.63808
								'formaldehyde / secbutanol'	-2.41543	0.208013	-0.025339	2.08118	-1.02298	0.767012
								'1-chloropropane / hexadecane'	-2.4011	0.515171	-0.972439	-0.547467	2.46628	1.51547
								'nitromethane / cyclohexane'	-1.69278	0.505937	-0.899622	1.76376	-0.755445	0.667644
								'acetaldehyde / diethylether'	-1.84587	0.510003	-0.878982	1.35103	-2.64201	0.450771
								'propionitrile / hexadecane'	-3.17244	-0.0928853	-0.262735	-1.49878	1.72363	0.869307
								'trimethylamine / chlorobenzene'	-0.95044	0.795477	2.37695	-0.873891	-0.584326	0.638813
								'methyl acetate / pentadecane'	-2.33743	0.0751975	-0.461762	-1.50692	1.47214	0.987377
								'methyl formate / octanol'	-2.06875	-0.0936725	0.165465	0.568541	0.95018	0.397782
								'nitromethane / isooctane'	-2.30683	0.62389	-1.70174	1.00594	-1.12455	1.20133
								'1-propanol / hexane'	-1.87013	-0.163615	-0.840015	-0.400013	-1.94142	-0.955498
								'nitromethane / decane'	-2.28431	0.0550972	-1.53053	0.958234	0.268713	1.18907
								'diethyl ether / hexadecane'	-2.278	0.574728	0.560392	-2.96116	1.28902	0.728752
								'trimethylamine / benzene'	-1.17488	1.35904	1.81707	-0.62659	-1.37145	-0.0954696
								'1-pentene / hexadecane'	-2.10101	0.738846	-0.59777	-1.0943	2.75612	0.428678
								'1-propanol / hexadecane'	-2.70849	-1.42785	-0.876603	-1.87092	1.78053	0.089163
								'ethylamine / carbontet'	-1.94486	-0.205034	0.810607	-0.888566	-1.5354	-0.535184
								'dichloromethane / hexadecane'	-2.72414	0.0255255	-1.83781	0.469565	2.692	2.21614
								'dichloromethane / hexadecyliodide'	-2.87231	0.206407	-0.784708	-0.517598	3.27089	3.18111
								'1-propanol / pentane'	-1.79184	-0.0108824	-1.00305	-0.128469	-2.43802	-1.19703
								'1-propanol / decane'	-2.12362	-0.765115	-0.63419	-1.01589	-0.21826	-0.48925
								'dimethylamine / carbontet'	-1.95003	-0.108517	0.563278	-0.48224	-1.24948	-0.44558
								'dimethylamine / chlorobenzene'	-1.40944	-0.677547	1.63763	-0.511067	-0.583055	0.248163
								'1-propanol / dodecane'	-2.39327	-0.960768	-0.715194	-1.4546	0.41188	-0.133215
								'1-pentyne / hexadecane'	-2.31166	-0.0286437	-0.424578	-1.75353	2.23853	0.121975
								'trimethylamine / diisopropylether'	-1.49739	1.20607	0.275003	-0.597979	-2.40331	0.0018904
								'ethylamine / benzene'	-1.62871	-0.210506	1.32507	-0.670093	-1.65611	-0.575725
								'ethanol / hexane'	-2.61464	-0.236673	-0.789115	-0.186511	-2.0258	-0.786843
								'1-propanol / cyclohexane'	-1.53209	-0.314275	-0.00328317	-0.210372	-1.24242	-1.01067
								'ethylamine / bromobenzene'	-1.43764	-0.920049	2.16024	-1.10236	-0.119491	0.243491
								'ethylamine / iodobenzene'	-1.46358	-1.04468	2.62423	-1.39063	0.777875	0.387439
								'trimethylamine / toluene'	-1.30977	1.18604	1.70994	-0.937245	-1.14224	0.242999
								'2-chloropropane / hexadecane'	-2.36471	0.504718	-1.06812	-0.431853	2.48971	1.61029
								'methyl propanoate / hexadecane'	-1.75499	0.152776	-0.495831	-1.84564	1.88136	0.877322
								'dimethylamine / toluene'	-1.76876	-0.286981	0.970611	-0.574422	-1.14097	-0.147652
								'ethylamine / toluene'	-1.7636	-0.383498	1.21794	-0.980747	-1.42689	-0.237256
								'methyl acetate / hexadecane'	-2.43362	-0.0173473	-0.509702	-1.64043	1.76056	1.07732
								'acetone / cyclohexane'	-1.34868	0.563388	0.053476	-0.018594	-2.01838	0.995835
								'cyclopentane / octanol'	-1.96419	1.73307	0.76143	1.2414	2.98268	-1.53894
								'methylamine / toluene'	-2.48672	-0.53546	1.30013	-0.893235	-1.62304	-0.0442522
								'fluorotrichloromethane / octanol'	-0.738493	2.62495	-0.497879	2.60122	2.33141	2.60082
								'dimethylamine / diethylether'	-1.75661	-0.138617	-0.431499	0.149022	-2.89688	-0.63279
								'2-methylpropene / carbontet'	-1.48906	1.39172	0.555561	0.478298	-0.137439	-0.562588
								'trimethylamine / cyclohexane'	-1.54301	1.4206	1.10788	-0.962908	-1.93	0.235938
								'fluorotrichloromethane / chloroform'	-0.334446	3.7092	0.128282	3.24943	0.699395	1.92164
								'ethylamine / ethylbenzene'	-1.85069	-0.547108	1.17695	-1.19029	-1.1311	-0.011459
								'ethyl formate / hexadecane'	-2.55746	0.260945	-0.462658	-1.42452	1.90385	1.14184
								'ethylamine / odichlorobenzene'	-1.32854	-1.23477	2.30173	-1.21279	-0.0329672	0.701519
								'nitromethane / hexadecane'	-2.86919	-0.607634	-1.77294	0.103211	2.2675	1.76748
								'methanol / benzene'	-2.63488	-0.590633	0.780361	0.534737	-0.871047	-1.01712
								'chloroethane / octanol'	-1.87728	0.204553	-0.279734	1.34478	1.38087	0.913705
								'acetone / tetralin'	-1.25472	-0.22158	1.1206	-0.532122	0.438629	1.45394
								'methanol / 1,2-Dichlorethane'	-2.25686	-1.05227	0.950129	0.900008	-0.88026	-0.699907
								'ethanol / ethylbenzene'	-2.13045	-0.785497	0.608678	-0.180746	-0.243245	-0.609159
								'propanal / hexadecane'	-2.57438	-0.346542	-0.923431	-1.3008	1.42606	1.87097
								'2,2-dimethylpropane / hexadecane'	-2.83673	1.76516	0.161921	-0.811592	3.84154	-1.00207
								'1-butene / carbontet'	-1.61651	1.66705	0.50453	0.877449	0.296362	-0.782707
								'isopropanol / hexadecane'	-2.73333	-1.39235	-0.895952	-1.80515	1.81544	0.109838
								'acetone / decane'	-1.94021	0.112548	-0.577431	-0.824115	-0.994221	1.51726
								'acetone / octane'	-1.87098	0.439138	-0.628355	-0.671688	-1.85931	1.4442
								'n-pentane / octanol'	-1.51347	1.54387	1.04633	0.470201	2.59764	-1.77405
								'ethanol / decane'	-2.86813	-0.838173	-0.58329	-0.802391	-0.302637	-0.320595
								'ethanol / cyclohexane'	-2.27659	-0.387333	0.047617	0.00313036	-1.3268	-0.842017
								'acetonitrile / hexadecane'	-3.97399	-0.192512	-0.223408	-1.23407	1.73847	0.894384
								'1-pentene / isooctane'	-1.53865	1.97037	-0.526563	-0.191574	-0.635936	-0.137475
								'methanol / bromobenzene'	-2.44381	-1.30018	1.61553	0.102466	0.665573	-0.197907
								'acetone / hexadecane'	-2.52509	-0.550183	-0.819844	-1.67914	1.00457	2.09567
								'Dimethylether / methanol'	-1.29441	0.653815	2.05717	1.02225	-2.62698	-0.332806
								'ethylamine / hexadecane'	-3.17324	-1.26252	-0.257432	-2.66695	0.808296	0.855518
								'chloroethane / hexadecane'	-3.13331	0.414214	-0.946052	-0.322135	2.39	1.6765
								'1-butene / isooctane'	-2.28253	1.84109	-0.492302	0.00178797	-0.751995	0.0418426
								'methanol / carbontet'	-2.95103	-0.585162	0.265893	0.316264	-0.75034	-0.976582
								'trimethylamine / hexadecane'	-2.71942	0.307026	0.234564	-2.62345	1.09295	1.33577
								'dimethylamine / hexadecane'	-3.17841	-1.166	-0.504761	-2.26063	1.09422	0.945122
								'methanol / iodobenzene'	-2.46975	-1.4248	2.07951	-0.185799	1.56294	-0.0539585
								'methanol / toluene'	-2.76976	-0.763625	0.673226	0.224083	-0.641829	-0.678654
								'methylamine / chlorobenzene'	-2.12739	-0.926025	1.96715	-0.829881	-1.06512	0.351562
								'ethanol / pentane'	-2.53635	-0.0839406	-0.952146	0.0850332	-2.52239	-1.02838
								'ethanol / heptane'	-2.69778	-0.383683	-0.6933	-0.414919	-1.571	-0.593534
								'ethanol / octane'	-2.79889	-0.511583	-0.634214	-0.649964	-1.16772	-0.39365
								'ethanol / nonane'	-2.88802	-0.645049	-0.606018	-0.834187	-0.767813	-0.248406
								's-trans-1,3-butadiene / hexadecane'	-2.65635	0.232037	-1.35126	-0.154511	2.91466	0.911849
								'ethylamine / hexane'	-2.33488	0.00171594	-0.220844	-1.19605	-2.91365	-0.189143
								'ethylamine / heptane'	-2.41802	-0.145294	-0.125029	-1.42446	-2.45886	0.00416602
								'n-Pentane / acetonitrile'	-0.165578	2.24005	2.78164	1.24173	-1.15251	-0.792015
								'1-butyne / hexadecane'	-3.07346	-0.0396338	-0.408183	-1.43983	2.22266	0.324214
								'acetonitrile / heptane'	-3.21876	0.924709	-0.091005	0.00842759	-1.52868	0.0430319
								'dimethyl ether / octanol'	-2.50736	0.173911	1.32171	-0.900114	0.0261751	0.396773
								'ethanol / dodecane'	-3.13778	-1.03383	-0.664294	-1.2411	0.327502	0.0354392
								'ethylamine / octane'	-2.51914	-0.273194	-0.0659435	-1.6595	-2.05558	0.20405
								'ethanol / hexadecane'	-3.453	-1.5009	-0.825703	-1.65741	1.69615	0.257818
								'1-butene / hexadecane'	-2.84489	0.609565	-0.563509	-0.900939	2.64006	0.607995
								'methyl formate / hexadecane'	-3.32478	0.115989	-0.500853	-1.09838	1.95931	1.16058
								'ethylamine / nonane'	-2.60826	-0.40666	-0.0377474	-1.84373	-1.65567	0.349295
								'ethylamine / decane'	-2.58837	-0.599784	-0.0150195	-1.81193	-1.19049	0.277105
								'2-methylpropane / hexadecane'	-3.54597	1.71262	0.373799	-0.844826	3.60979	-0.841366
								'1,1-Difluorethane / methanol'	-1.85815	1.60829	2.19673	2.10415	-1.32679	-1.14408
								'acetonitrile / cyclohexane'	-2.79758	0.921059	0.649912	0.426476	-1.28447	-0.205451
								'n-butane / octanol'	-2.30489	1.51447	1.14481	0.687871	2.56563	-1.69613
								'methanol / xylene (mixed isomers)'	-2.94729	-0.847711	0.800765	0.0284735	0.247964	-0.982302
								'water / toluene'	-3.66747	-0.883242	0.836232	0.413299	-0.651732	-0.832672
								'acetaldehyde / hexadecane'	-3.26767	-0.517379	-0.952244	-1.05862	1.34909	2.02868
								'propene / isooctane'	-2.98802	1.57384	-0.422463	0.016277	-1.01289	0.209614
								'cyclopropane / octanol'	-3.27223	1.21844	1.02862	0.959303	2.1613	-0.945128
								'water / xylene (mixed isomers)'	-3.845	-0.967328	0.963771	0.21769	0.238061	-1.13632
								'difluorodichloromethane / chloroform'	-1.25021	3.7098	0.650344	3.05431	0.822924	1.04462
								'water / ethylbenzene'	-3.75456	-1.04685	0.79524	0.20376	-0.355941	-0.606874
								'dimethyl ether / hexadecane'	-3.76339	0.383572	0.655396	-2.56703	1.03531	1.15957
								'methanol / hexane'	-3.34105	-0.378412	-0.765558	0.00877856	-2.12859	-0.630541
								'2-methylpropane / octanol'	-2.28994	1.50296	1.04012	0.82209	2.60066	-1.60416
								'n-propane / hexadecane'	-4.34583	1.69836	0.569936	-0.755311	3.52092	-0.8055
								'water / isopropylbenzene'	-3.94579	-1.0687	0.620293	-0.0314807	-0.205584	-0.495657
								'propyne / hexadecane'	-3.86919	-0.050734	-0.310129	-1.22958	2.14214	0.506176
								'methanol / hexadecane'	-4.17941	-1.64264	-0.802146	-1.46212	1.59336	0.41412
								'methanol / decane'	-3.59454	-0.979912	-0.559733	-0.607101	-0.405431	-0.164292
								'methanol / heptane'	-3.42419	-0.525422	-0.669743	-0.219629	-1.67379	-0.437232
								'methanol / octane'	-3.5253	-0.653322	-0.610657	-0.454674	-1.27051	-0.237348
								'n-propane / octanol'	-3.08979	1.4887	1.23625	0.911606	2.51179	-1.56829
								'1,1-difluoroethane / octanol'	-3.0711	1.12839	1.46127	0.181785	1.32637	-0.4145
								'formaldehyde / hexadecane'	-4.19149	-0.0752538	-0.820642	-0.480379	1.66314	2.0911
								'fluoroethane / hexadecane'	-4.55957	1.32366	0.742427	-1.30147	2.45737	0.240959
								'hydrogen sulfide / hexadecane'	-4.51195	0.647339	-0.593872	-0.195127	2.05482	2.23135
								'ethane / octanol'	-3.98103	1.54884	1.41982	1.165	2.6179	-1.69837
								'ethene / hexadecane'	-4.57218	0.780195	-0.629934	0.213263	3.15986	0.612563
								'water / hexadecane'	-5.07711	-1.76226	-0.63914	-1.27291	1.58346	0.260103
								'ethyne / hexadecane'	-5.18923	0.549012	-0.813074	0.752123	3.67561	0.0676482
								'methane / hexadecane'	-6.30277	1.72245	1.23482	-0.536656	3.78514	-1.70675
								'methane / octanol'	-5.04674	1.51278	1.90114	1.13026	2.77601	-2.46954
								'tetrafluoromethane / octanol'	-4.84991	4.18568	3.25628	0.923119	3.1906	-1.95197

## Sheet: S5
Table S5 Data for Figure 4
π	Vmc	S	q+	eL	eH	E	log P	μj	μi	q-	Pc	σ	ΔHv	e0	MW	nD	Tb	Tc	Vm	Vc
0.233095	0.184437	0.146948	0.0895936	0.0711718	0.0511558	0.0436648	0.0435534	0.0434164	0.0210355	0.0207929	0.0204519	0.0185653	0.0161015	0.014105	0.00952948	0.00939729	0.00412256	0.00304868	0.00222382	0.000275991

## Sheet: S6
Solutes in Solvents		Solute Chemical Family Training//Test
		acetate	acid	alcohol	aldehyde	amine/amide	anhydrides	C, H, Halide compounds	C, H, NO2	chloride	epoxide	ester	ether	ester	ether	formate	hydrocarbon	ketone	nitrile	other	polyfunctional C, H, O	polyfunctional C, H, O, halide	polyfunctional C, H, O, N	polyfunctional C, H, O, S	polyols	silanes/siloxanes	sulfides/thiophenes
Solvent Chemical Family Training//Test	acetate	4//3	1//1	12//5	0//0	3//1	0//0	0//0	1//0	0//0	0//0	0//0	0//0	0//0	0//0	0//0	3//1	0//0	0//0	0//0	0//0	0//0	0//0	0//0	0//0	0//0	0//0
	acid	0//0	6//2	1//0	0//0	0//0	0//0	0//0	1//0	0//0	0//0	0//0	0//0	0//0	0//0	0//0	0//0	1//0	0//0	0//0	0//0	0//0	0//0	0//0	0//0	0//0	0//0
	alcohol	4//1	9//4	61//19	7//3	45//10	0//0	10//4	7//2	1//1	5//1			4//1	6//3	1//0	21//7	8//2	4//1	8//1	0//0	0//0	0//1	0//0	0//0	0//0	1//0
	aldehyde	0//0	0//0	0//0	4//1	0//0	0//0	0//0	0//0	0//0	0//0	0//0	0//0	0//0	0//0	0//0	0//0	0//0	0//0	0//0	0//0	0//0	0//0	0//0	0//0	0//0	0//0
	amine/amide	0//0	2//0	4//3	0//0	24//7	0//0	0//0	4//1	0//0	2//0			0//0	0//0	0//0	5//3	4//1	0//0	0//0	0//0	0//0	0//0	0//0	0//0	0//0	0//0
	C, H, Halide compounds	35//11	12//5	72//21	5//1	31//18	0//0	25//6	8//7	2//0	1//0			18//3	4//1	0//0	25//4	27//5	2//0	4//0	0//0	0//0	0//0	0//0	0//0	0//0	2//1
	C, H, NO2 compounds	0//0	1//2	5//1	0//0	1//0	0//0	0//0	10//2	0//0	0//0			1//0	0//0	0//0	0//0	2//0	0//0	1//0	0//0	0//0	0//0	0//0	0//0	0//0	0//0
	chloride	0//0	0//0	0//0	0//0	0//0	0//0	0//0	0//0	3//0	0//0	0//0	0//0	0//0	0//0	0//0	0//0	0//0	0//0	0//0	0//0	0//0	0//0	0//0	0//0	0//0	0//0
	epoxide	0//0	0//0	1//0	0//0	0//0	0//0	0//0	1//0	0//0	3//0			0//0	0//0	0//0	2//0	1//0	0//0	0//0	0//0	0//0	0//0	0//0	0//0	0//0	0//0
	ester	0//0	0//0	0//0	0//0	0//0	0//0	0//0	0//0	0//0	0//0			5//2	0//0	0//0	0//0	0//0	0//0	0//0	0//0	0//0	0//0	0//0	0//0	0//0	0//0
	ether	0//0	5//1	14//4	2//1	16//5	0//0	1//1	5//3	0//0	0//0			0//0	10//3	0//0	16//2	5//2	1//1	1//1	0//0	0//0	0//0	0//0	0//0	0//0	0//0
	formate	0//0	0//0	0//0	0//0	0//0	0//0	0//0	0//0	0//0	0//0	0//0	0//0	0//0	0//0	0//2	0//0	0//0	0//0	0//0	0//0	0//0	0//0	0//0	0//0	0//0	0//0
	hydrocarbon	63//26	20//6	118//25	10//2	97//26	0//0	34//5	23//3	5//0	0//0			54//9	9//1	2//0	64//11	89//25	8//1	14//2	0//0	0//0	0//0	0//0	0//1	1//0	6//3
	ketone	0//0	8//1	3//1	4//0	0//0	0//0	0//0	1//2	0//0	0//0			1//0	0//0	0//0	3//2	10//3	0//0	0//0	0//0	0//0	0//0	0//0	0//0	0//0	0//0
	nitrile	0//0	0//0	6//2	0//0	3//0	0//0	0//0	2//0	0//0	0//0			0//0	0//0	0//0	5//2	2//0	5//1	1//2	0//0	0//0	0//0	0//0	0//0	0//0	0//0
	other	0//0	0//0	3//4	0//0	2//1	0//0	0//0	0//0	0//0	0//0			0//0	0//0	0//0	0//0	0//0	0//0	4//1	0//0	0//0	0//0	0//0	0//0	0//0	0//0
	polyfunctional C, H, O	0//0	0//0	0//0	0//0	0//0	0//0	0//0	0//0	0//0	0//0			0//0	0//0	0//0	0//0	0//0	0//0	0//0	2//0	0//0	0//0	0//0	0//0	0//0	0//0
	polyfunctional C, H, O, halide	0//0	0//0	0//0	0//0	0//0	0//0	0//0	0//0	0//0	0//0			0//0	0//0	0//0	0//0	0//0	0//0	0//0	0//0	0//2	0//0	0//0	0//0	0//0	0//0
	polyfunctional C, H, O, N	0//0	0//0	3//1	0//0	1//0	0//0	1//0	2//0	0//0	2//0			0//0	0//0	0//0	1//1	2//0	0//0	0//0	0//0	0//0	1//0	0//0	0//0	0//0	0//0
	polyols	0//0	0//0	0//0	0//0	0//0	0//0	0//0	0//0	0//0	0//0	0//0	0//0	0//0	0//0	0//0	0//0	0//0	0//0	0//0	0//0	0//0	0//0	0//0	1//1	0//0	0//0
	silanes/siloxanes	0//0	0//0	0//0	0//0	0//0	0//0	0//0	0//0	0//0	0//0	0//0	0//0	0//0	0//0	0//0	0//0	0//0	0//0	0//0	0//0	0//0	0//0	0//0	0//0	1//0	0//0
	sulfides/thiophenes	2//1	0//0	0//2	0//0	0//0	0//0	0//0	1//1	0//0	0//0	0//0	0//0	0//0	0//0	0//0	1//0	2//0	0//0	1//0	0//0	0//0	0//0	0//0	0//0	0//0	6//2
