# Supplementary material for: Hybrid QSPR models for the prediction of the free energy of solvation of organic solute/solvent pairs
Source: Royal Society of Chemistry journal article supplement (doi:10.1039/c8cp07562j), 2019-01-01
Supplement: c8cp07562j2.xlsx [file c8cp07562j2.xlsx]

## Sheet: Prediction
PLS model	Enter descriptors for solvent and solute in Value column to obtain free energy of solvation prediction (cell F3)
Descriptor		Value	unit		Predicted Free Energy of Solvation:
Boiling point at 1 atm	Tb	467.1	K		-13.5282	kcal/mol
Molecular weight	MW	130.228	g/mol
Critical Temperature	Tc	652.3	K
Critical Pressure	Pc	2.783	Mpa
Critical Volume	Vc	0.509	m3/kmol
Molar volume at 298 K and 1 atm	Vm	0.1577	m3/kmol
Dipole moment at 298 K and 1 atm	μj	1.64886	Debye
Relative permittivity at 298 K and 1 atm	er	10.3	-
Refractive index at 298 K and 1 atm	nD	1.4276	-
Surface tension at 298 K and 1 atm	σ	26.9	nm/m
Heat of vaporization at boiling point (1atm)	ΔHv	72	kJ/mol
Octanol-water partition coefficient at 298 K and 1 atm and infinite dilution	log P	3.07	-
Isotropic polarizability	π	216.76
Energy of the HOMO	eH	-0.2091	a.u.
Energy of the LUMO	eL	-0.0469	a.u.
Dipole moment	μi	5.979	Debye
Electronic acidity*	q+	0.344292	-
Electronic basicity*	q-	-0.53585	-
Molecular van der Waals volume	Vmc	326.978
Electronic energy	E	-767.39	a.u.
Ideal gas entropy at 298 K	S	127.877	cal/(mol.K)
Tb	Mw	Tc	Pc	Vc	Vm	DM-Solvent	DC	RI	ST	deltaHv	log P	Pola	HOMO	LUMO	DM-Solute	q+	q-	Vmc	E	S
467.1	130.228	652.3	2.783	0.509	0.1577	1.64886	10.3	1.4276	26.9	72	3.07	216.76	-0.2091	-0.0469	5.979	0.344292	-0.53585	326.978	-767.39	127.877
Mean Centered
53.4233	7.72069	48.4243	-0.883567	-16.0347	-0.242871	0.614753	2.74284	-0.0148436	-0.266284	25.415	-0.0986528	144.526	0.0481637	-0.0672312	3.73419	0.139467	-0.0470232	172.328	-424.37	45.7393
Auto Scaled
0.775205	0.158006	0.647022	-0.585143	-0.199462	-0.0484869	0.517504	0.22396	-0.245261	-0.0429366	1.50322	-0.0438697	4.72019	1.73942	-1.31414	2.8923	1.55424	-0.383357	3.59697	-1.64101	3.11352
Scores
7.00953	-2.68493	-3.34507	-0.506416	1.13224
y_pred-mcs
-4.95934
Yscaled
-13.5282

## Sheet: Wstar
-0.0461922	-0.141263	-0.0235985	-0.101683	0.250568
-0.0998171	-0.0252263	-0.0938301	-0.0725952	0.295926
-0.00381875	-0.0678264	0.202894	-0.179684	0.14699
0.143129	-0.0378255	0.1285	0.331538	0.156367
-0.0072252	0.0125711	0.0331099	0.0269665	0.124127
-0.0144887	0.0593338	0.19634	-0.0440525	0.0864691
0.209887	-0.205448	0.116251	0.13246	-0.0204515
0.100815	-0.0530361	0.300819	-0.104582	-0.290482
0.0655645	0.0779676	0.350004	-0.0783157	0.194139
0.126818	-0.0627924	0.323813	0.0331721	0.20385
-0.0311226	-0.290171	-0.327341	0.225818	0.58326
-0.212129	0.134833	-0.00235925	-0.419825	-0.213811
0.518305	-0.11357	-0.305604	0.202003	0.397641
0.21773	-0.263432	-0.0622971	-0.338359	-0.498866
-0.23188	0.252195	0.581282	-0.567279	-0.263232
0.139137	-0.13413	0.0271571	-0.253712	-0.463068
0.121464	-0.768678	-0.680809	0.474093	0.357954
-0.0898679	0.255005	-0.197551	0.545301	0.436308
0.467928	0.0850055	0.00813527	-0.149178	0.0857379
-0.215914	-0.104506	0.12173	-0.0465679	0.166756
0.411092	0.180276	0.161032	-0.310792	-0.0890264

## Sheet: Q
-0.540422	0.237069	0.157663	-0.0991743	-0.0508259

## Sheet: means-std
mx
413.677	122.507	603.876	3.66657	16.5437	0.400571	1.03411	7.55716	1.44244	27.1663	46.585	3.16865	72.2338	-0.257264	0.0203312	2.24481	0.204825	-0.488827	154.65	-343.021	82.1377
sx
68.915	48.8633	74.8419	1.51	80.3898	5.00901	1.18792	12.247	0.0605216	6.2018	16.907	2.24877	30.6187	0.0276895	0.0511599	1.29108	0.089733	0.122662	47.9093	258.602	14.6905
my
-5.0477
sy
1.71
